# Supplementary material for: Trehalose ameliorates severe acute pancreatitis by modulating the gut microbial metabolism
Source: Research Square preprint supplement (doi:10.21203/rs.3.rs-4768563/v1), 2024-10-01
Supplement: Supplementary file 1 [file 559d3b97f9c2b8ae08766e0a.xlsx]

## Sheet: Figure 1
Figure 1c	histology scores
	BC				ATBx				SAP				ATBx+SAP
	Edema	Inflammation	Necrosis	Bleeding	Edema	Inflammation	Necrosis	Bleeding	Edema	Inflammation	Necrosis	Bleeding	Edema	Inflammation	Necrosis	Bleeding
	0.6	0.2	0	0	0.3	0	0	0	3.7	2.4	0.9	0.8	1.4	0.8	0.1	0.1
	0.4	0.3	0	0	0.2	0	0	0	2.1	1.2	0.2	0.2	2.7	1.3	0.4	0.1
	0.2	0.1	0	0	0.3	0	0	0	3	1.5	0.8	0.5	3.1	1	0.5	0.1
	0.2	0	0	0	1.5	0.4	0	0	3.7	2.8	1.3	1	2.8	1.4	0.2	0
	0.2	0	0	0	0.6	0	0	0	3.9	3.3	1.5	1.2	3.3	0.8	0.6	0.6
	0.6	0.1	0	0	0.3	0	0	0	1.8	0.7	0	0	3.2	2.1	1.2	1.1
	0.5	0.1	0	0	0.6	0.1	0	0	2.2	1.2	0.6	0.7	1.5	0.9	0	0
	0.6	0	0	0	0.5	0	0	0	2.2	1	0.7	0.5	2.3	1.1	0	0.1
	0.7	0.6	0	0	0.8	0.2	0	0	2.8	1.5	0.8	0.2	2.5	1.4	0.1	0.7
	0.1	0.1	0	0	0.2	0	0	0	3	1.6	0.7	0.1	2.6	1.8	0.2	0.8
	0.7	0	0	0	0.6	0	0	0	3.2	2.5	0.9	0.8	2.6	0.8	0.5	0.8
	0.2	0.2	0	0	0.4	0.1	0	0	2.1	1.8	0.2	0	3.2	1.2	0.2	0.2
Figure 1d	Serum amylase levels
	BC	ATBx	SAP	ATBx+SAP
	0.670092	0.381288	6.20444	4.72743
	0.44132	0.572743	4.0741	3.08924
	0.40238	0.44132	5.64792	3.96161
	0.49324	0.494862	6.10385	5.19362
	0.489995	0.580855	5.09087	4.25852
	0.528935	0.723635	6.82045	4.40185
	0.502164	0.744727	7.19254	4.01569
	0.594646	0.421039	6.22121	5.52542
	0.640888	0.820985	4.77583	4.29232
	0.917524	0.776366	5.46215	5.52542
	1.17875	0.635209	5.69092	4.50649
	1.06679	0.7523	3.96863	4.99
Figure 1e	Inflammatory Factor Microarrays
		BC												SAP												ATBx+SAP
	G-CSF	219.71	398.65	246.78	557.03	231.32	1356.67	1125.25	458.63	563.21	354.32	458.78	896.23	213819	230811	170611	185734	272972	162495	198755	135988	185209	175842	284566	265490	146389	248562	212023	222821	211621	204001	186559	256488	186595	202545	185470	175839
	IL-6	7.13	8.23	10.96	6.3	1.46	61.83	5.13	6.23	11.25	5.2	9.5	12.5	82727.4	111658	85788.9	91512.6	125340	28445.9	98568.5	98765.2	78569.2	98652.4	11256.8	18795.8	42481.3	39525.1	59750.8	32927.2	53767.5	61375.3	76592.5	58946.1	68975.2	58765.4	48953.2	35897.5
	MCP-1	348.59	362.91	333.91	270.74	216.85	417.15	4582	458.68	256.35	356.25	158.4	512.2	58128.1	64688.6	64674.2	75210.5	79054.7	64761.1	78952.5	54868.2	54875.2	55468.2	68542.2	75862.2	53637.8	54213.4	67436.3	70686.7	69566.9	73316.8	56863.1	65482.2	74586.2	62548.3	70215.5	63325.5
	IL-12(p40)	1047.63	810.12	778.49	770.6	1040.77	1199.01	985.45	685.45	895.2	875.25	940.52	1099.52	24709.6	31356.5	47778.2	46210.8	42617.5	40279.8	25860.2	28569.2	39875.5	52613.2	38546.8	38542.5	39698	62011.2	54302.9	35492.6	30561.7	40009.3	35204.5	58943.2	40586.5	52012.5	20482.8	32587.4
	RANTES	230.41	250.96	190.91	208.92	167.1	213.3	332.5	152.2	256.2	158.2	185.2	321.2	28155	30541.3	39557.2	35597.7	38578.7	31301.5	18597.5	25894.5	19857.2	25468.2	40245.2	24513.5	27233.2	41503.3	39670.2	32199.9	37028.8	30449.7	30254.2	35424.2	29584.5	22154.5	27458.4	32578.8
	MIP-1β	167.09	176.31	185.38	123.3	104.94	152.95	175.5	186.2	178.5	168.56	125.5	168.5	18493	14756.6	16548.5	47255	34562.1	29468.2	20152.3	15823.2	15245.2	25621.6	45236.2	32154.2	15869.2	20563.2	26244.3	45612.6	25757.3	67405.6	18562.3	18562.2	35214.5	35688.2	32412.2	25124.5
	KC	179.97	156.29	185.13	169.55	158.96	182.56	156.23	163.54	201.3	175.5	163.2	202.1	18093.1	19875.6	20903.6	28211.7	34301.3	27256.3	19856.2	20125.2	21356.2	18548.4	24586.2	30254.8	23555.5	25576.4	21180.5	26038.4	22470.6	19317.5	24563.2	30254.5	18456.2	16895.2	24586.9	20154.8
	Eotaxin	1643.71	1699.35	1365.47	1444.36	1373.59	1313.87	1154.3	989.25	1256.24	1144.23	1045.36	1458.36	6098.63	5804.96	6466.07	6540.63	7627.69	6669.59	5425.12	4956.78	3468.87	4563.24	6647.25	3685.97	6696.93	7195.02	6019.12	5893.84	6244.28	5459.39	5624.12	5165.87	4019.56	6848.45	3244.57	4489.12
	MIP-1α	4.56	5.21	4.56	3.23	2.56	4.23	3.25	4.25	5.23	5.56	3.56	2.56	1936.25	1451.14	2438.08	1469.43	2005.88	1361.12	2063.1	1565.2	1452.5	2583.2	2001.5	1685.2	2884.94	3604.7	2437.27	2094.32	1548.3	1847.13	2856.2	1200.25	2452.2	1856.4	1689.45	1986.5
	IL-17A	100.07	107.89	97.87	106.25	93.46	64.65	85.25	87.54	105.23	113.25	102.35	74.58	1689.3	1526.9	1752.35	1186.82	374.74	811.54	1745.21	1456.25	1234.5	987.2	658.5	1811.24	506.76	1539.14	477.8	158.15	202.62	330.73	1123.5	1025.4	688.58	954.21	425.6	845.1
	IL-10	39.91	39.91	39.91	28.27	34.17	42.73	25.25	35.25	30.24	24.12	38.56	32.85	924.81	990.73	1120.71	700.81	872.29	758.6	1125.57	895.21	982.52	800.85	987.52	584.25	1241.89	1782.39	969.98	749.62	579.21	810.41	1358.24	1245.21	1025.4	985.54	879.45	910.25
	IL-12(p70)	208.84	141.49	141.36	146.86	136.12	130.76	108.25	241.25	152.23	156.23	152.35	100.58	547.57	716.9	725.43	694.18	553.17	586.85	654.52	458.65	658.25	587.21	658.24	685.21	604.62	1019.08	432.82	555.48	406.25	741.29	504.23	998.23	563.52	586.255	896.52	789.58
	IL-1β	3.39	5.12	5.12	4.26	3.39	4.26	3.52	5.02	8.12	3.65	5.48	5.86	585.66	724.73	916.51	362.58	431.44	235.01	658.59	685.52	856.23	456.21	336.25	256.32	447.57	819.71	654.52	539.17	469.44	572.81	447.54	789.54	546.23	485.21	568.45	478.45
	IFN-γ	11.81	11.81	13.69	7.99	7.51	10.39	12.25	10.24	11.25	8.56	11.51	9.35	365.93	520.34	621.36	135.99	130.45	98.02	456.21	458.24	601.24	235.24	150.24	108.25	172.13	105.06	264.2	115.11	104.86	227.45	235.12	152.14	362.12	250.74	204.51	125.86
	TNF-α	62.53	53.84	53.84	27.42	31.87	56.02	52.35	65.21	85.12	35.21	41.25	46.58	158.69	156.57	186.14	152.34	156.57	181.93	168.52	186.57	202.14	163.25	168.54	198.58	143.55	178.58	178.58	119.57	155.34	167.01	343.21	213.24	185.21	120.35	178.56	107.58
	GM-CSF	40.22	48.98	64.14	30.07	40.22	40.22	30.22	28.98	56.23	45.21	37.52	48.52	186.46	180.93	179.06	175.29	186.46	167.6	198.56	202.12	165.23	185.24	178.45	170.65	167.6	202.49	171.47	167.6	171.47	177.18	154.21	198.23	175.56	154.27	203.14	184.52
	IL-13	12.89	29.41	45.25	12.89	12.89	15.45	10.23	24.23	21.23	22.21	20.23	16.23	137.61	201.43	137.61	143.55	155.34	201.43	156.23	301.2	123.54	243.54	255.78	301.23	144.58	186.14	148.1	90.8	139.62	165.03	114.12	154.58	168.57	172.52	180.52	148.59
	IL-1α	12.86	4.1	4.99	7.5	8.3	4.1	8.52	5.12	4.52	6.58	7.5	6.4	131.98	112.22	312.37	88.02	101.25	73.92	145.25	122.22	263.58	188.54	142.58	198.58	130.99	231.95	107.9	127.76	86.96	110.95	230.25	158.56	156.24	135.24	186.58	109.57
	IL-5	27.38	49.34	35.37	14.04	14.04	19.15	22.52	35.62	24.52	18.52	16.58	20.58	92.23	103.7	100.84	51.62	53.9	41.63	102.52	203.4	100.52	62.21	86.58	104.5	68.14	165.74	85.72	40.08	62.18	76.24	108.5	105.65	98.52	60.52	82.51	126.58
	IL-9	30.3	21.77	38.65	24.64	18.87	26.06	20.35	21.35	28.56	34.56	28.57	36.25	53.62	65.63	57.64	60.31	65.63	65.63	63.52	76.52	67.58	40.52	75.89	45.85	54.96	65.63	52.27	50.92	56.3	57.64	64.58	55.28	82.58	60.58	66.23	47.25
	IL-2	0.94	3.21	1.24	3.24	5.26	0.94	1.02	2.25	2.58	1.58	4.12	3.25	24.79	31.99	23.31	30.58	29.86	28.43	25.68	32.58	24.58	36.58	35.86	33.45	29.15	37.55	29.15	29.15	29.15	30.58	28.58	38.52	28.54	33.58	30.28	20.98
	IL-3	1.94	2.49	2.49	1.94	0.81	3.29	2.58	2.2	1.24	1.52	1.87	2.29	25.55	25.06	27.78	22.58	23.82	27.78	35.2	20.25	20.58	28.56	32.01	24.58	20.85	31.23	22.34	19.36	18.86	23.82	18.52	35.21	32.15	18.54	22.01	13.28
	IL-4	0.14	2.93	2.93	0.14	0.84	1.12	1.2	1.93	1.25	2.14	1.85	1.68	10.1	13.74	13.74	11.72	12.13	13.74	12.58	15.47	12.58	15.24	12.68	11.85	12.94	14.15	10.5	10.5	10.5	8.04	12.52	11.58	11.52	9.58	8.58	11.25
Figure 1f	Serum lipids levels
	TG				TC				HDL-C				LDL-C
	BC	ATBx	SAP	ATBX+SAP	BC	ATBx	SAP	ATBX+SAP	BC	ATBx	SAP	ATBX+SAP	BC	ATBx	SAP	ATBX+SAP
	0.31	0.55	1.76	0.55	1.97	2.43	2.28	2.55	0.79	0.87	0.75	0.66	0.2	0.25	0.13	0.12
	0.5	0.27	0.91	0.52	2.02	2.59	1.8	2.26	1.32	1.02	0.54	0.59	0.21	0.18	0.09	0.13
	0.33	0.43	0.95	0.45	2.08	2.38	2.27	2.51	0.86	0.93	0.61	0.69	0.2	0.23	0.17	0.12
	0.36	0.31	1.11	0.42	2.53	2.63	2.43	2.57	1.2	1.03	0.9	1.16	0.19	0.22	0.15	0.16
	0.25	0.33	0.6	0.76	2.75	2.67	2.64	2.55	1.45	1.22	0.89	1.06	0.2	0.2	0.12	0.16
	0.54	0.27	0.55	0.49	2.62	2.77	2.65	2.7	1.17	1.13	1.1	1.02	0.19	0.23	0.13	0.17
	0.35	0.64	0.5	0.42	1.96	2.14	3.05	1.77	0.82	0.91	0.96	0.97	0.29	0.19	0.18	0.09
	0.3	0.31	1.42	0.67	1.98	2.03	2.85	1.82	0.85	0.9	1.12	0.92	0.27	0.29	0.32	0.3
	0.39	0.33	0.5	0.87	2.12	1.94	2.85	2.11	0.92	0.93	1.07	1.31	0.28	0.21	0.23	0.22
	0.7	0.29	0.89	0.66	2.17	1.79	3.14	2.49	1.17	0.71	0.91	0.93	0.3	0.25	0.26	0.27
	0.72	0.41	0.75	0.59	2.56	2.61	2.18	2.55	1.24	1.31	1.21	1.22	0.26	0.28	0.25	0.21
	0.93	0.68	0.45	0.54	2.32	2.53	2.88	2.74	1.14	1.3	0.85	1.06	0.21	0.17	0.35	0.12

## Sheet: Figure 2
Figure 2a	PCoA
	Sample	V1	V2	V3	Groups
	C1	-0.445375	-0.267895	-0.0625634	BC
	C2	-0.472354	-0.200274	-0.112357
	C3	-0.428228	-0.192736	-0.123951
	C4	-0.458182	-0.239235	-0.109164
	C5	-0.456696	-0.216158	-0.11052
	C6	-0.403812	-0.148611	0.10432
	C7	-0.445923	-0.106997	0.0461946
	C8	-0.484968	-0.100613	-0.0355746
	C9	-0.371606	-0.110383	0.122131
	C10	-0.457539	-0.228595	0.0648611
	C11	-0.347862	-0.167928	0.151401
	A1	0.437508	-0.0149029	-0.0981631	ATBx
	A2	0.446844	-0.0172356	-0.10638
	A3	0.447706	-0.0343793	-0.0882568
	A4	0.392209	-0.00664002	-0.040652
	A5	0.460819	-0.0367017	-0.0899477
	A6	0.456754	-0.0328901	-0.0840674
	A7	0.29825	-0.00271495	-0.00519297
	A8	0.349789	-0.0317906	-0.0512048
	A9	0.376135	-0.0178305	-0.0602672
	A10	0.246746	-0.0207452	0.0813529
	A11	0.348227	-0.0381689	0.00915668
	A12	0.220619	-0.0588808	0.0479219
	S1	-0.307735	0.252498	-0.232581	SAP
	S2	-0.270443	0.279453	-0.0829144
	S3	-0.32987	0.150562	-0.0482322
	S4	-0.277035	0.357848	-0.144131
	S5	-0.346244	0.147514	0.0301815
	S6	-0.310851	0.277647	0.0293816
	S7	-0.311826	0.146572	0.096905
	S8	-0.20847	0.189953	0.100363
	S9	-0.221652	0.437428	-0.0189118
	S10	-0.333518	0.238371	0.0510562
	SA1	0.310336	-0.0300738	-0.0432336	ATBx+SAP
	SA2	0.421974	0.0382503	-0.0646918
	SA3	0.441938	-0.0160032	-0.0833572
	SA4	0.308946	0.0556694	0.24743
	SA5	0.228248	0.0189079	0.14727
	SA6	0.182844	0.0621583	0.363584
	SA7	0.323996	-0.0704251	-0.0542606
	SA8	0.231074	-0.109025	0.00575805
	SA9	0.126042	0.0046446	0.0867935
	SA10	0.303266	-0.0530795	-0.0128834
	SA11	0.0419996	-0.024086	0.139653
	SA12	0.287918	-0.0624776	0.0377439
Figure 2b	Microbial distribution of the top 10 abundance after ATBx treatment
	Phylum	BC	ATBX	SAP	ATBx+SAP	Family	BC	ATBX	SAP	ATBx+SAP
	p__Firmicutes	50.8686	8.55317	32.7069	14.8407	f__Lachnospiraceae	29.1118	3.09006	9.65624	3.95594
	p__Verrucomicrobiota	19.6527	0.797233	30.2082	3.19235	f__Akkermansiaceae	19.6054	0.783375	30.1872	3.14605
	p__Bacteroidota	9.00762	2.1978	9.08403	4.15113	f__Muribaculaceae	7.63974	1.47405	8.04927	1.87496
	p__Desulfobacterota	7.1383	1.34773	4.29385	3.09275	f__Desulfovibrionaceae	7.36766	1.60966	4.39402	3.3699
	p__Proteobacteria	5.9779	83.2873	16.2314	67.8082	f__Erysipelotrichaceae	6.29475	0.440139	2.57524	0.873004
	p__Actinobacteriota	1.25725	0.575867	0.585293	1.12019	f__Lactobacillaceae	3.89074	2.34044	7.12937	3.9925
	p__Actinobacteria	0.679919	0.439056	1.2579	0.880236	f__Enterobacteriaceae	3.35244	81.8766	12.6758	63.726
	p__Deferribacteres	0.266006	0.0233913	0.212916	0.0348043	f__Streptococcaceae	2.24686	0.342139	1.20292	2.46337
	p__Spirochaetota	0.154982	0.0352141	0.0261199	0.133063	f__Methylophilaceae	1.44473	0.00484806	0.0912604	0.0144804
	p__Synergistota	0.0929128	0.0557519	0.496739	0.0630252	f__Eggerthellaceae	1.09871	0.254694	0.413015	0.26512
	Others	4.90378	2.68754	4.8966	4.68355	Others	17.9472	7.78396	23.6257	16.3187
Figure 2c	LEFSe analysis
	Microbial names	Logarithm value	Groups	LDA value	p value	Note
	p__Firmicutes	5.72152	BC	4.99836	0.000430095	Top10
	p__Cyanobacteria	4.03449	SAP	3.67832	0.00485175
	p__Verrucomicrobiota	5.48705	SAP	4.7098	0.0242357	Top10
	p__Desulfobacterota	4.86798	BC	4.14362	0.0290392	Top10
	p__Gemmatimonadota	1.61213	SAP	4.13922	0.00357946
	p__Proteobacteria	5.21745	SAP	4.73705	0.00194577	Top10
	f__Desulfovibrionaceae	4.91815	BC	4.17194	0.0346405	Top10
	f__Thermoactinomycetaceae	1.99971	SAP	3.63845	0.019334
	f__unidentified_Chloroplast	4.05023	SAP	3.67576	0.00745335
	f__Diplorickettsiaceae	1.3727	SAP	3.9004	0.0238574
	f__Enterobacteriaceae	5.14471	SAP	4.71267	0.000107511	Top10
	f__Lachnospiraceae	5.5091	BC	4.99186	0.000189854	Top10
	f__Solirubrobacteraceae	1.96952	SAP	3.93379	0.00532556
	f__Peptostreptococcaceae	4.03008	SAP	3.56848	0.00745335
	f__Promicromonosporaceae	0.947776	SAP	4.40766	0.0238574
	f__Pseudomonadaceae	4.17994	SAP	3.8472	0.00310093
	f__Akkermansiaceae	5.52111	SAP	4.68503	0.0137156	Top10
	f__Erysipelotrichaceae	4.84246	BC	4.31477	0.0137156	Top10
	f__Lactobacillaceae	4.89636	SAP	4.23123	0.0290392	Top10
Figure 2d	LEFSe analysis
	Microbial names	Logarithm value	Groups	LDA value	p value	Note
	p__Firmicutes	5.52279	SAP	4.99437	0.000369931	Top10
	p__Coprothermobacterota	1.85339	ATBx+SAP	4.93804	0.0381513
	p__unidentified_Bacteria	4.1853	SAP	4.06447	0.0295586
	p__Verrucomicrobiota	5.48705	SAP	5.12108	7.61e-05	Top10
	p__Deferribacteres	3.3361	SAP	4.05574	0.000584947	Top10
	p__Bacteroidota	4.96461	SAP	4.35833	0.0146991	Top10
	p__Proteobacteria	5.8375	ATBx+SAP	5.41693	7.61e-05	Top10
	f__Enterobacteriaceae	5.8148	ATBx+SAP	5.40188	7.6125e-05	Top10
	f__Lachnospiraceae	5.0296	SAP	4.56704	0.0122228	Top10
	f__Peptostreptococcaceae	4.03008	SAP	3.62655	0.00123373
	f___Eubacterium__coprostanoligenes_group	3.95286	SAP	3.6902	0.000368517
	f__Peptococcaceae	4.08855	SAP	3.78985	0.00435159
	f__Akkermansiaceae	5.52111	SAP	5.15948	7.6125e-05	Top10
	f__Hungateiclostridiaceae	1.03844	SAP	3.77365	0.0467678
	f__Erysipelotrichaceae	4.44867	SAP	3.90829	0.005616	Top10
	f__Muribaculaceae	4.94415	SAP	4.46488	0.000606304	Top10
	f__Lactobacillaceae	4.89636	SAP	4.29342	0.0146991	Top10
Figure 2e	PCA analysis
	id	PC1(36.5%)	PC2(9%)	Groups
	C1	-23.4633	5.49536	BC
	C2	-23.9573	30.5752	BC
	C3	-18.4799	22.4632	BC
	C4	-24.245	0.818309	BC
	C5	-24.1838	12.5329	BC
	C6	-24.9317	8.71421	BC
	C7	-24.4977	15.7795	BC
	C8	-23.4532	17.7497	BC
	C9	-22.6678	13.9129	BC
	C10	-22.5856	10.509	BC
	C11	-22.8466	9.21499	BC
	A1	29.9846	17.0863	ATBX
	A2	22.2689	-1.01597	ATBX
	A3	20.7811	-3.87158	ATBX
	A4	32.2711	13.5561	ATBX
	A5	23.0316	0.430695	ATBX
	A6	26.6126	-0.778393	ATBX
	A7	24.109	-0.223511	ATBX
	A8	24.1755	0.312212	ATBX
	A9	24.7437	1.31586	ATBX
	A10	27.4139	7.8204	ATBX
	A11	28.171	8.7111	ATBX
	A12	26.3369	7.47115	ATBX
	S1	-26.6095	-17.3259	SAP
	S2	-32.7953	-2.48087	SAP
	S3	-27.0837	-5.71703	SAP
	S4	-24.6297	-14.1242	SAP
	S5	-28.209	-17.5217	SAP
	S6	-30.6491	-8.66428	SAP
	S7	-26.9475	-14.5647	SAP
	S8	-24.7247	-15.6792	SAP
	S9	-31.9001	-12.0604	SAP
	S10	-29.7454	-1.58506	SAP
	SA1	23.6358	2.73939	ATBx+SAP
	SA2	27.6589	11.0664	ATBx+SAP
	SA3	13.4131	-10.9632	ATBx+SAP
	SA4	21.642	-7.66455	ATBx+SAP
	SA5	10.5328	-22.9411	ATBx+SAP
	SA6	17.4706	-16.6651	ATBx+SAP
	SA7	13.963	-17.7704	ATBx+SAP
	SA8	19.0602	-5.95333	ATBx+SAP
	SA9	20.5233	-3.83618	ATBx+SAP
	SA10	15.4209	-13.1887	ATBx+SAP
	SA11	26.0629	4.21491	ATBx+SAP
	SA12	19.3229	-7.8945	ATBx+SAP
Figure 2f,g	Supplementary Table 1
Figure 2h	Gut metabolites distribution in BC mice
	Log2(Relative abundance)	Count	The proportion of classes(%)
			Fatty Acyls	Glycerophospholipids	Organooxygen compounds	Carboxylic acids and derivatives	Others
	≤21	74	24.3243	1.35135	4.05405	25.6757	44.5946
	21-23	119	21.8487	3.36135	10.084	20.1681	44.5378
	23-25	271	21.7712	4.05904	8.48709	16.9742	48.7085
	25-27	455	12.7472	6.59341	6.15385	17.3626	57.1429
	27-29	451	13.082	7.5388	5.09978	18.4035	55.8758
	29-31	234	13.2479	9.82906	7.26496	14.9573	54.7009
	>31	68	5.88235	10.2941	5.88235	13.2353	64.7059
Figure 2i	Supplementary Table 1
Figure 2j	ChemRICH for ATBX treatment in SAP vs. BC group							ChemRICH in ATBx+SAP vs. SAP group
	Cluster name	Cluster size	p-values	Altered metabolites	Increased	Decreased	Increased proportion (%)	Cluster name	Cluster size	p-values	Altered metabolites	Increased	Decreased	Increased proportion (%)
	Carboxylic acids and derivatives	28	2.2e-20	28	2	26	7.14286	Carboxylic acids and derivatives	28	2.2e-20	28	23	5	82.1429
	Fatty Acyls	19	2.2e-20	19	14	5	73.6842	Fatty Acyls	19	2.2e-20	19	4	15	21.0526
	Glycerophospholipids	8	2.2e-20	8	6	2	75	Glycerophospholipids	8	2.2e-20	8	1	7	12.5
	Imidazopyrimidines	4	2.2e-20	4	2	2	50	Indoles and derivatives	5	2.2e-20	5	3	2	60
	Indoles and derivatives	5	2.2e-20	5	1	4	20	Organonitrogen compounds	4	2.2e-20	4	3	1	75
	Organooxygen compounds	9	2.2e-20	9	1	8	11.1111	Organooxygen compounds	9	2.2e-20	9	7	2	77.7778
	Organonitrogen compounds	4	4.9e-15	4	1	3	25	Prenol lipids	4	2.2e-20	4	1	3	25
	Prenol lipids	4	2.9e-13	4	2	2	50	Imidazopyrimidines	4	1.7e-13	4	1	3	25
Figure 2l	Compound Name	Class	Log2(Flod Change)
			ATBx+SAP vs. SAP	SAP vs. BC
	α,α-Trehalose	Organooxygen compounds	7.17332	-1.92909
	Maltotetraose	Organooxygen compounds	5.49158	-1.70631
	2-(2-acetyl-3,5-dihydroxyphenyl)acetic acid	Organooxygen compounds	5.37778	-2.38052
	Stachyose	Organooxygen compounds	5.34468	-1.58247
	D-(+)-Maltose	Organooxygen compounds	3.94058	-3.72246
	Gluconolactone	Organooxygen compounds	3.43115	-3.12911
	α-Lactose	Organooxygen compounds	2.69151	-1.67947
	Glucosamine 6-sulfate	Organooxygen compounds	-2.89617	1.75084
	L-(-)-Glyceric acid	Organooxygen compounds	-2.9816	-1.01328
	GQH	Carboxylic acids and derivatives	7.04204	-1.0203
	DL-Arginine	Carboxylic acids and derivatives	6.28275	-2.95073
	WNH	Carboxylic acids and derivatives	5.09147	-1.58846
	L-Histidine	Carboxylic acids and derivatives	4.96039	-1.46615
	DKK	Carboxylic acids and derivatives	4.45957	-2.03054
	N-α-L-Acetyl-arginine	Carboxylic acids and derivatives	4.39773	-1.78936
	cis-4-Hydroxy-D-proline	Carboxylic acids and derivatives	4.27762	-1.3527
	EPK	Carboxylic acids and derivatives	3.58919	-1.79421
	N-[1-(4-methoxy-2-oxo-2H-pyran-6-yl)-2-methylbutyl]acetamide	Carboxylic acids and derivatives	2.59438	-2.46215
	N3,N4-Dimethyl-L-arginine	Carboxylic acids and derivatives	2.52059	-1.30554
	YLH	Carboxylic acids and derivatives	2.49789	-2.21879
	FQH	Carboxylic acids and derivatives	2.25838	-1.66115
	Hydroxyproline	Carboxylic acids and derivatives	2.17278	-1.1305
	DL-Serine	Carboxylic acids and derivatives	2.10498	-1.05969
	LPK	Carboxylic acids and derivatives	2.04718	-2.20371
	INK	Carboxylic acids and derivatives	2.00902	-2.7499
	DPK	Carboxylic acids and derivatives	1.98378	-1.10565
	PNK	Carboxylic acids and derivatives	1.64658	-1.41277
	DPH	Carboxylic acids and derivatives	1.609	-1.07841
	L-arginine	Carboxylic acids and derivatives	1.58643	-1.2387
	NLK	Carboxylic acids and derivatives	1.45935	-2.39578
	TMK	Carboxylic acids and derivatives	1.33445	-1.13473
	Cinnamoylglycine	Carboxylic acids and derivatives	1.29993	-1.77565
	4-decyl-3-hydroxy-5-oxooxolane-2,3-dicarboxylic acid	Carboxylic acids and derivatives	-2.62768	2.88196
	Ornithine	Carboxylic acids and derivatives	-2.93783	-1.49195
	Citrulline	Carboxylic acids and derivatives	-3.1436	-1.53021
	Cyclohexaneacetic acid	Carboxylic acids and derivatives	-3.83626	1.54798
	FMH	Carboxylic acids and derivatives	-4.2586	-1.67396

## Sheet: Figure 3
Figure 3c	histology scores
	BC				0.2% Tre				SAP				0.2% Tre+SAP				0.5% Tre+SAP				1% Tre+SAP				2% Tre+SAP				5% Tre+SAP
	Edema	Inflammation	Necrosis	Bleeding	Edema	Inflammation	Necrosis	Bleeding	Edema	Inflammation	Necrosis	Bleeding	Edema	Inflammation	Necrosis	Bleeding	Edema	Inflammation	Necrosis	Bleeding	Edema	Inflammation	Necrosis	Bleeding	Edema	Inflammation	Necrosis	Bleeding	Edema	Inflammation	Necrosis	Bleeding
	0.3	0.1	0	0	0.6	0.2	0	0	2.5	1.8	0.6	0.7	2.2	1.4	0.3	0.2	2.1	1.6	0.4	0.3	2.4	1.8	0.5	0.4	2.1	1.6	0.1	0.2	2.7	2.1	0.5	0.6
	0.2	0.2	0	0	0.4	0.1	0	0	2.8	2.2	0.4	0.3	2.4	2	0.4	0.3	2	2.1	0.3	0.4	2.2	1.5	0.1	0.2	2.2	1.3	0.1	0.4	2.7	1.9	0.5	0.6
	0.6	0	0	0	0.6	0.2	0	0	2.7	2.7	0.3	0.4	2.2	1.8	0.2	0.4	2.2	1.6	0.5	0.3	2.5	1.7	0.3	0.1	2.1	1.5	0	0.6	2.4	1.5	0	0.3
	0.7	0.2	0	0	0.6	0	0	0	2.7	2.6	0.5	0.9	2.2	0.9	0.5	0.5	2.3	0.6	0.3	0.6	2.4	1.4	0.4	0.6	2.3	1.6	0.3	0.1	2.7	1.8	0.2	0.9
	0.5	0	0	0	0.2	0	0	0	2.5	2.2	0.3	0.7	1.7	1.4	0.3	0.2	1.9	1.6	0.2	0.3	2.3	1.7	0.1	0.4	2.4	1.9	0.4	0.5	2.5	2	0.4	0.2
	0.3	0	0	0	0.4	0.1	0	0	2.3	1.8	0.2	0	2.8	2.2	0.4	0.3	2	2	0.1	0.4	2	2	0.3	0.4	2.3	1.3	0.6	0.3	2.5	1.6	0.4	0.3
	0.2	0	0	0	0.2	0.1	0	0	3.2	2	0.5	0.4	2.4	2.3	0.3	0.2	2.6	1.7	0.1	0.8	2	1.7	0.4	0.5	2.8	1.4	0.5	0.5	3.2	1.5	0.4	0.2
	0.2	0.1	0	0	0.1	0	0	0	2.2	2.4	0.3	0.3	3	1.6	0.2	0.4	2	1.3	0.5	0.4	2.2	1.8	0.6	0.2	2.9	1.7	0	0	2.3	2.4	0.5	0.5
	0.1	0	0	0	0	0	0	0	1.8	2.2	0.4	0.4	2.4	1	0.1	0.5	3.5	2.3	0.2	0.9	2.7	1.7	0.4	0.8	2.5	1.6	0.3	0.2	2.4	2.5	0.4	0.7
	0.6	0.1	0	0	0.6	0.1	0	0	1.6	1.2	0.1	0.5	2.8	2.4	0.3	0.2	3.2	2.2	0.2	0.1	2	1.5	0.5	0.7	2.5	1.8	0.4	0.4	3.2	2.2	0.3	0.9
	0.3	0	0	0	0.1	0	0	0	2.3	1.6	0.6	0.4	2.7	2	0.5	0.1	2	1.7	0.5	0.9	3.3	2	0.1	0.4	2.8	2	0.1	0.4	2.3	1.8	0.4	0.4
	0.3	0	0	0	0.2	0	0	0	2.4	2.6	0.4	0.2	2.4	1.8	0.4	0.4	2.8	2.3	0.2	0.6	2.6	1.4	0.5	0.2	2	1.4	0.2	0.6	3	1.9	0.8	0.4
	0.3	0	0	0	0.2	0	0	0	3.5	2	0.3	0.3	1.4	0.8	0.3	0	2.7	1.2	0	0	2.7	1.3	0.2	0.2	2.4	1.3	0.4	0.4	2.1	1.4	0.7	0.6
	0.1	0	0	0	0.4	0	0	0	3.1	2	0.2	0.2	3.2	2.2	0.2	0.3	2	0.3	0	0.1	2.6	1.6	0.1	0.3	2.4	1.7	0.1	0.2	2.5	2	0.2	0.2
	0.2	0	0	0	0.5	0.2	0	0	2.6	1.8	0.5	0.1	2.6	1.2	0.1	0.6	2.5	1	0.1	0.2	2.1	1.2	0.2	0.5	2.7	1.9	0.2	0.1	2.8	2.4	0.6	0.4
	0.1	0	0	0	0.4	0	0	0	2.5	2.2	0.7	0.2	2.4	1.2	0.3	0.4	3.4	2.4	0.3	0.4	3.1	1.7	0.1	0.4	2.3	1.8	0.3	0.3	1.9	1.5	0.5	0.4
	0.1	0	0	0	0.3	0	0	0	2.7	2.4	0.6	0.4	1.2	0.4	0.1	0.5	2.6	1.4	0.1	0.2	1.4	0.9	0	0.1	2.2	1.4	0.5	0.2	2	1.7	0.4	0.2
Figure 3d	Serum amylase levels
	BC	0.2% Tre	SAP	0.2%Tre+SAP	0.5%Tre+SAP	1%Tre+SAP	2%Tre+SAP	5%Tre+SAP
	0.618173	0.455923	3.16171	3.42548	3.0215	3.1254	1.587	3.121
	0.608437	0.627907	2.7404	3.05301	2.5821	2.58468	4.8751	4.0251
	0.618173	0.53218	2.89129	2.63656	4.125	2.6351	3.65421	2.032
	0.548405	0.543538	4.12223	2.67388	3.21025	3.65487	2.58462	3.65421
	0.35892	0.611683	3.12115	3.16712	1.8524	2.5421	4.1254	4.1251
	0.54828	0.556357	4.7541	3.7542	2.15486	4.2581	3.2542	4.2512
	0.572505	0.603173	3.8745	3.0215	3.6542	3.2548	3.84562	4.02512
	0.619748	0.579375	2.59336	4.06521	3.02451	3.02541	4.02512	3.0215
	0.560078	0.475177	5.84761	2.9875	2.25451	3.84521	4.85621	3.8452
	0.578527	0.57144	2.52773	2.89662	3.8594	2.74585	4.5231	5.1205
	0.6207	0.611662	2.21555	2.38423	3.32154	3.32545	1.95462	2.5245
	0.67446	0.56157	2.56503	1.99439	3.25121	1.95462	2.52136	5.21242
	0.56856	0.626618	3.3642	2.48415	3.45215	2.2415	2.35412	4.2152
	0.50586	0.535913	2.89424	4.60872	2.6254	2.68547	2.65482	4.65182
	0.60054	0.502328	3.7584	3.73884	2.7854	2.74581	2.75652	1.85642
	0.585398	0.493125	4.55835	3.07416	2.2352	2.2541	3.5421	2.01245
	0.712395	0.516075	2.98296	2.5784	2.3654	3.2145	2.03152	3.542
Figure 3e	Inflammatory Factor Microarray (log2(mean serum levels))
	Name	BC	0.2%Tre	SAP	0.2%Tre+SAP	0.5%Tre+SAP	1%Tre+SAP	2%Tre+SAP	5%Tre+SAP
	Eotaxin	10.5442	10.6032	13.3914	13.2436	13.4582	13.2666	13.48	13.1445
	IL-12(p40)	9.38123	9.15834	12.8972	12.6044	12.8781	12.5255	12.8884	12.7776
	G-CSF	8.60247	8.36331	18.3633	18.4374	14.9007	15.1575	15.297	18.1875
	RANTES	6.89028	7.14426	13.9199	13.8067	13.6148	14.1786	14.3295	14.0406
	MCP-1	6.90582	6.5928	15.0369	14.5441	14.1771	13.9853	14.0175	14.3057
	IL-17A	5.75715	5.54146	9.70856	8.82962	8.19032	8.06356	7.4317	7.10879
	IL-12(p70)	5.68538	5.55965	7.39562	7.63326	7.70183	7.44708	7.51175	7.31016
	MIP-1β	5.62029	5.45441	10.8803	10.5904	10.6954	10.7525	10.9746	10.9565
	TNF-α	5.51459	5.08623	8.21515	7.88489	7.65464	7.52	7.78	7.39766
	KC	5.02696	4.91337	13.6785	13.3402	13.4996	13.9245	13.7418	13.3701
	IL-13	4.52212	4.67792	7.37369	7.21803	7.25172	7.23074	7.13545	7.41109
	IL-10	3.623	3.49208	8.97715	8.74163	8.84015	9.23458	9.10905	9.2293
	GM-CSF	3.59483	3.4874	7.22606	7.34471	7.04985	7.30561	7.49346	7.47978
	IL-9	3.42009	3.25994	5.45408	5.40147	5.32912	5.2555	5.59096	5.39917
	IFN-γ	2.73361	2.51972	6.97525	6.64764	5.95884	6.36632	6.17393	5.87774
	IL-5	1.99192	1.7501	6.40124	6.39458	6.67525	6.55766	6.23266	6.46761
	IL-2	1.22433	1.43704	4.3243	4.13316	4.21101	4.02237	3.93074	4.49185
	IL-1α	1.23807	0.854817	6.67637	6.42478	6.57289	6.81762	6.62205	6.91648
	IL-3	1.0017	0.419063	4.12131	3.93995	4.10434	4.04439	3.94486	3.89724
	IL-1β	0.640458	0.4975	7.57105	7.17397	7.64962	7.29829	7.34021	7.53683
	IL-6	0.641002	0.208995	13.082	11.7958	11.4792	10.85	10.78	12.0559
	MIP-1α	0.237708	0.143662	5.53182	5.4859	5.40939	5.60259	5.65592	5.33092
	IL-4	-0.262695	-0.353024	2.32396	2.24471	2.49057	1.71765	2.25852	2.38957
Figure 3f,g	Name/(pg/ml)	BC																	0.2%Tre																	SAP
	Eotaxin	1462	1383	1392	1359	1082	1044	1330	1676	1301	1265	2035	1739	1197	1908	2006	1161	2044	425.43	1780	1807	1346	1520	1476	715.98	1200	1163	1668	1000	1311	2177	2054	2145	2541	2115.5	11077	12600	14124	13487	8642	8990	13436	10548	9924	10506	12037	13008	10101	5949
	IL-12(p40)	570.69	660.28	606.07	552.02	598.72	980	636.17	612.76	566.69	408.45	558.69	524.71	658.41	1029	794.35	728.63	850.92	560.02	529.37	498.1	542.69	429.68	798.93	363.35	347.44	407.12	631.48	536.03	572.02	725.72	853.84	447.65	680.44	789.78	4022	8686	8843	9062	7717	6941	17513	7313	8667	5363	8915	8407	4468	3389.64
	G-CSF	405.36	422.53	516.05	450.61	615.51	511.38	410.05	447.49	216.7	104.33	360.08	297.63	328.24	408.74	243.41	283.55	586.03	313.23	420.97	188.88	232.21	590.67	244.65	239.98	253.98	480.23	294.51	274.23	176.58	345.45	408.15	352.57	405.2	376.8	332658	445685	421562	321547	285641	315486	288465	328415	398546	380571	401287	356849	296236	326248
	RANTES	69.5	132.65	125.18	114.53	138.55	111.45	111.45	97.34	108.35	120.64	124.42	129.67	134.35	147.24	122.1	103.01	126.22	47.11	178.2	165.75	145.84	140.01	160.13	108.35	108.35	81.16	141.47	132.65	79.51	208.01	207.13	110.55	183.05	207.57	11260	12673	13416	13625	12021	13789	25756	16815	13365	13297	11271	14404	19336	21172
	MCP-1	146.86	108.89	101.04	81.06	101.04	124.33	120.5	139.43	85.09	112.78	131.93	101.04	175.22	127.54	127.54	105.29	148.91	112.78	116.66	116.66	77	101.04	139.43	68.84	81.06	72.93	108.89	77	52.36	136.8	105.29	72.35	80.76	121.045	46128	46637	48848	53969	33848	38769	55848	46949	24188	34060	17692	47531	12588	9460
	IL-17A	39.56	69.23	52.22	50.48	55.81	65.38	63.93	78.76	51.35	55.42	55.52	52.61	47.36	50.08	22.55	49.68	59.5	11.3	47.17	44.45	25.8	38.98	86.16	50.09	49.12	47.07	67.31	48.92	37.51	49.88	43.88	48.04	49.2	46.88	579.86	889.09	889.67	874.26	801.63	507.23	3365	779.38	508.65	1441	658.51	1003	161.15	417.5
	IL-12(p70)	80.71	56.64	34.55	30.24	55.42	36.76	40.12	75.51	38.99	62.82	57.87	23.07	53.33	53.33	62.03	46.97	66.46	33.4	40.12	30.24	22.09	35.65	110.23	11.31	32.38	24.06	51.8	45.88	10.52	64.24	49.08	34.77	149.38	56.66	104.76	166.76	228.43	268.79	184.2	150.94	327.71	195.91	85.96	115.74	204.74	200.32	162.97	70.94
	MIP-1β	44.81	49.89	46.84	34.58	48.87	56.94	44.81	70.8	56.94	36.63	45.83	26.36	49.91	73.47	42.93	46.44	60.18	22.12	56.94	42.77	44.81	44.81	71.78	20.22	14.16	30.47	40.73	27.38	24.3	68.53	41.17	67.71	72.65	54.85	1560	2789	2025	1738	1353	1614	4132	1623	1470	1713	1183	2405	1635.2	1517.76
	TNF-α	72.09	66.92	47.16	47.16	56.84	27.54	38.6	72.09	42.5	72.09	61.83	37.97	17.61	39.8	25.29	29.32	22.34	21.43	49.54	47.16	33.58	31.94	18.06	47.16	51.94	37.97	52.09	29.35	37.97	28.3	17.61	14.9	35.55	22.955	192.96	273.76	318.13	327.7	239.27	267.46	453.15	280.07	202.14	286.39	261.18	299.06	156.85	400.55
	KC	37.26	28.22	36.36	30.94	31.85	37.26	31.85	46.18	29.58	37.26	30.94	29.12	24.08	30.42	32.1	30	30.84	23.66	32.75	32.75	33.66	27.3	45.3	53.21	28.67	25.03	28.22	32.75	22.29	21.12	22.81	26.2	34.61	21.965	18118	15042	18251	21221	16123	14894	16233	15670	12436	17944	10535	16569	4024.08	4204.8
	IL-13	32.81	21.94	30.57	21.94	21.94	26.18	21.94	35.08	21.94	32.81	17.87	26.18	15.8	22.41	12.7	12.7	15.8	17.87	21.94	21.94	21.94	26.18	30.57	83.89	30.57	17.87	26.18	26.18	17.87	22.41	15.8	15.8	19.04	19.105	124.84	166.08	202.06	176.38	140.3	186.66	303.46	196.93	124.84	235.26	145.46	242.89	110.52	103.48
	IL-10	12.2	5.17	6.78	12.2	10.08	23.11	11.48	42.97	6.78	9.39	10.78	6.78	10.94	13.28	5.59	9.81	12.11	14.43	12.2	9.39	7.41	13.67	9.39	5.57	3.37	6.78	15.17	10.78	5.57	13.28	9.81	27.83	10.94	15.69	135.38	362.06	379.12	551.38	598.64	414.53	1551	455.02	408.93	337.47	710.94	438.41	319.32	388.72
	GM-CSF	11.9	14.33	11.9	11.9	19.76	11.9	11.9	22.42	11.9	17.06	11.9	11.9	5.19	7.86	5.88	7.86	9.84	11.9	11.9	14.33	11.9	11.9	17.06	11.9	11.9	11.9	11.9	11.9	11.9	7.86	5.88	7.86	11.8	6.87	118.38	154.97	169.53	156.91	128.82	142.94	191.43	152.34	107.4	172.6	135.99	171.37	142.36	139.2
	IL-9	6.2	12.83	10.95	10.02	10.95	12.83	10.95	22.11	11.88	11.88	14.74	8.21	8.14	7.36	5.86	8.14	8.92	12.68	9.11	12.83	10.95	11.88	18.65	5.61	11.88	6.46	14.74	10.02	5.61	5.86	3.72	5.13	12.93	4.79	40.7	41.7	61.7	59.22	44.72	41.2	64.68	47.73	31.63	38.68	39.69	45.72	35.74	32.42
	IFN-γ	5.98	7.15	6.44	5.98	6.44	6.91	5.53	11.62	6.91	7.39	6.91	3.39	7.76	5.83	5.64	6.98	6.21	6.76	6.91	5.98	4.86	5.3	9.34	4.21	4.21	5.08	5.98	5.08	3.39	7.76	4.18	4.72	7.76	5.97	138.47	168.05	111.42	198.27	130.51	173.18	173	121.42	61.22	154.96	144.72	149.27	52.9	90.4
	IL-5	2.48	2.65	2.48	5.69	4.94	2.48	5.69	3.15	2.81	3.15	2.48	2.81	7.12	2.83	2.42	7.5	6.94	1.86	1.86	2.81	1.56	4.21	3.85	4.21	2.48	4.21	2.48	2.48	1.28	3.88	5.91	2.69	6.52	4.895	62.09	115.41	166.47	157.51	97.74	87.42	79.56	78.31	41.52	93.61	47	121.14	59.56	49.04
	IL-2	3.97	1.84	2.23	1.84	2.65	3.74	1.84	3.07	2.23	2.23	2.65	2.65	1.37	2.98	1.67	1.09	1.67	2.23	3.07	2.86	2.65	2.65	2.65	10.99	3.52	2.65	2.23	2.04	1.47	1.67	1.37	1.09	1.37	1.52	16.88	20.42	28.33	21.23	17.7	18.24	32.7	22.87	15.8	25.05	19.6	23.42	16.24	13.32
	IL-1α	2.95	3.17	2.95	2.31	2.41	6.11	1.61	3.39	4.42	2.41	2	1.8	0.49	1.14	0.73	1.14	1.07	0.37	4.31	1.8	2.2	2.2	3.28	3.96	1.16	1.61	2.1	2	2	0.86	0.61	0.55	1	0.735	83.84	110.12	149.77	175.71	98.59	126.54	272.28	106.21	61.05	73.79	59.32	115.45	49.92	66.52
	IL-3	1.82	1.45	1.45	1.63	1.63	2.4	2.32	2.01	2.41	1.63	1.45	1.1	0.62	7.85	1.26	1.83	1.18	2.48	1.63	1.63	1.1	1.45	1.45	0.64	1.1	1.02	1.82	0.94	1.1	2.01	0.75	0.89	1.34	1.38	13.58	19.11	20.72	16.46	15.67	17.52	24.2	19.38	13.58	19.65	13.58	23.13	13.96	10.4
	IL-1β	1.48	2.04	1.22	1.48	1.48	1.76	3.58	2.04	1.76	0.97	1.48	1.09	0.88	1.76	1.3	1.3	0.88	0.97	1.48	1.76	0.97	2.04	1.48	1.48	2.19	2.64	1.48	0.97	1.22	1.08	0.88	1.08	1.3	0.98	170.1	209.77	280.7	394.54	240.55	206.38	156	318.83	120.77	139.45	177.17	311.11	93.9	114.75
	IL-6	1.56	0.76	1.69	0.76	0.62	2.52	2.13	1.31	1.43	0.62	1.02	0.62	2.98	1.91	1.53	1.69	3.36	1.43	1.14	0.62	0.62	2.38	1.56	0.62	0.62	1.62	0.62	0.52	1.22	0.8	1.56	1.8	1.84	0.68	2962	9963	9850	7283	4605	7316	25498	13550	2892	22288	5302	24023	2311.44	2169.36
	MIP-1α	1.36	1.36	1.08	0.99	0.99	1.36	1.26	1.95	1.36	1.45	1.26	1.08	0.67	0.92	1.12	1.04	0.795	0.9	1.08	1.36	0.9	0.99	2.16	0.65	0.99	0.65	1.36	1.08	0.61	0.89	1.27	0.85	1.77	1.27	32.01	51.6	46.84	37.11	40.54	43.64	88.81	42.98	49.72	61.66	36.22	47.95	42.2	38.04
	IL-4	1.37	1	0.73	0.8	0.8	1.07	1.07	1.07	0.93	1.22	0.93	0.8	0.59	0.47	0.59	0.26	0.47	0.5	1	0.93	0.33	0.93	1.15	0.55	0.55	0.67	1.37	0.93	0.67	0.85	0.59	0.72	0.85	0.72	3.69	4.49	6.49	4.9	5.11	3.89	6.38	4.09	3.49	4.29	4.39	5.32	5.13	7.26
Figure 3h	TG				TC				HDL-C				LDL-C
	BC	0.2%Tre	SAP	0.2%Tre+SAP	BC	0.2%Tre	SAP	0.2%Tre+SAP	BC	0.2%Tre	SAP	0.2%Tre+SAP	BC	0.2%Tre	SAP	0.2%Tre+SAP
	0.8925	0.825	3.24	1.7825	2.885	2.505	3.665	3.83	1	0.915	1.235	1.165	0.395	0.31	0.445	0.615
	0.51	0.77	1.2625	1.3575	2.445	3.09	3.16	3.29	0.91	1.145	1.045	1.15	0.28	0.435	0.36	0.36
	0.8125	0.905	0.9775	0.81	2.15	2.66	3.315	3.435	0.77	1	1.15	1.125	0.26	0.445	0.36	0.385
	0.5125	0.6575	2.41	1.1525	2.425	2.83	4.165	3.6	0.9	1.005	0.875	1.235	0.415	0.365	0.26	0.43
	0.7225	0.4925	1.0225	0.91	2.55	2.735	3.985	3.66	0.835	1.04	1.51	1.07	0.365	0.35	0.315	0.61
	0.7275	0.5275	1.83	0.995	2.48	2.615	3.54	5.425	1.065	1.045	1.08	0.345	0.335	0.335	0.56	0.101
	0.62	0.76	1.19	1.46	2.67	3.135	3.985	3.89	1.005	1.05	1.635	1.335	0.43	0.46	0.425	0.53
	0.82	0.84	2.3775	1.9225	2.695	2.575	3.745	3.985	1.445	0.975	1.42	1.765	0.425	0.365	0.335	0.66
	0.7875	1.1125	2.5925	1.12	2.885	2.815	3.83	2.825	1.66	1.035	1.13	1.17	0.365	0.415	0.61	0.48
	0.7425	0.675	1.4275	1.3525	2.825	2.52	3.435	3.52	1.065	1.77	1.215	1.43	0.33	0.4	0.38	0.515
	0.715	0.745	1.0875	1.175	2.9	2.945	3.115	4.295	1.045	1.63	1.59	0.965	0.395	0.425	0.415	0.29
	0.5225	0.8575	1.78	0.9575	3.03	2.625	3.985	4.65	1.175	0.95	0.795	1.125	0.335	0.315	0.64	0.34
	0.6	0.47	0.51	0.47	2.65	2.55	2.57	1.96	1.21	1.18	1.03	0.78	0.44	0.47	0.32	0.23
	0.28	0.38	0.99	0.58	2.42	2.32	2.7	2.23	1.14	1.02	1.02	0.97	0.43	0.43	0.28	0.25
	0.55	0.19	0.91	0.45	2.29	2.34	2.54	2.55	1.35	1.08	1.02	0.83	0.43	0.41	0.26	0.33
	0.29	0.29	0.67	0.61	2.48	2.29	2.39	2.38	1.17	1.03	1.01	1.01	0.43	0.41	0.26	0.29
	0.35	0.79	0.76	0.29	2.025	2.23	2.02	1.99	1.123	1.07	0.86	0.87	0.235	0.34	0.21	0.23
[truncated: 20 more columns]

## Sheet: Figure 4
Figure 4a	PCoA analysis
	sample	V1	V2	V3	Groups
	BC1	-0.0302378	-0.135795	-0.0238743	BC
	BC2	-0.110402	-0.0770316	0.0565063
	BC3	-0.0330005	-0.0936943	-0.110767
	BC4	-0.0822897	-0.131621	-0.0602186
	BC5	-0.106041	-0.0152526	-0.0377795
	BC6	-0.198499	-0.0946047	-0.0898882
	BC7	-0.0813536	-0.191099	-0.0544624
	BC8	-0.207673	-0.128051	-0.0430581
	BC9	-0.0745947	-0.0717556	-0.0576687
	BC10	-0.196036	-0.0887163	-0.0656166
	BC11	-0.0920009	-0.0975749	-0.0315857
	BC12	-0.16191	-0.0610251	-0.074542
	BC13	-0.191725	-0.196049	-0.0190806
	BC14	-0.260397	-0.252901	-0.10535
	BC15	-0.199989	-0.215212	-0.0181662
	BC16	-0.287775	-0.217869	-0.0142991
	BC17	-0.204807	-0.137461	0.00685649
	Tre1	0.17052	-0.0305876	0.0732168	Tre
	Tre2	0.1427	-0.101937	-0.0539796
	Tre3	0.165834	-0.0899493	0.0656958
	Tre4	0.0863975	-0.0265185	0.0478908
	Tre5	0.134975	-0.077539	0.0598861
	Tre6	0.104937	-0.0687448	0.0482535
	Tre7	0.131593	-0.108681	0.0271538
	Tre8	0.0828685	-0.103394	0.0258228
	Tre9	0.141822	0.0351639	-0.077929
	Tre10	0.156045	-0.0942519	-0.0913435
	Tre11	0.155996	-0.0712214	-0.00826811
	Tre12	0.103227	-0.0261055	0.043117
	Tre13	-0.00859489	-0.0426879	0.136732
	Tre14	0.0899556	-0.0139535	0.164523
	Tre15	0.104729	-0.105743	0.270452
	Tre16	0.143908	-0.116472	0.20561
	Tre17	-0.0201373	-0.0919644	0.0792253
	SAP1	-0.0791032	0.116261	-0.0130356	SAP
	SAP2	-0.153721	0.103256	-0.051919
	SAP3	-0.101554	0.183424	-0.087329
	SAP4	-0.0831416	0.219044	-0.0657367
	SAP5	-0.0952973	0.13183	0.0255469
	SAP6	-0.157112	0.172752	-0.0744789
	SAP7	-0.0444592	0.180437	-0.0195407
	SAP8	-0.114073	0.266435	0.00756436
	SAP9	-0.105153	0.266634	-0.032669
	SAP10	-0.0626427	0.241373	0.00902855
	SAP11	-0.0902194	0.206749	-0.0911521
	SAP12	-0.0725918	0.17146	-0.0556511
	SAP13	-0.227184	0.083164	0.191322
	SAP14	-0.172144	0.205856	0.0796062
	SAP15	-0.163546	0.141248	0.137607
	SAP16	-0.0713879	0.197004	0.13955
	SAP17	-0.163383	0.0541279	0.167099
	TreSAP1	0.100743	-0.0236622	0.0130799	Tre+SAP
	TreSAP2	0.169276	-0.0255933	-0.081891
	TreSAP3	0.116728	0.0669168	-0.0564714
	TreSAP4	0.212088	0.0738649	-0.117089
	TreSAP5	0.270107	0.0297438	-0.0839627
	TreSAP6	0.162356	0.0273742	-0.0485908
	TreSAP7	0.15587	0.0453936	-0.077519
	TreSAP8	0.124699	0.0403073	-0.019352
	TreSAP9	0.17252	0.0335607	-0.113192
	TreSAP10	0.236023	0.0341629	-0.0615336
	TreSAP11	0.142217	0.0729659	-0.00914166
	TreSAP12	0.183927	-0.0387022	-0.0770746
	TreSAP13	0.0127709	-0.0272059	0.0557463
	TreSAP14	0.0234552	0.0334703	0.0571066
	TreSAP15	0.139158	-0.00855707	0.029022
	TreSAP16	0.092353	0.0057842	0.0382935
	TreSAP17	0.274377	0.0594191	0.0136941
Figure 4b	Microbial distribution of the top 10 abundance after oral trehalsoe
	Phylum	BC	Tre	SAP	Tre+SAP	Family	BC	Tre	SAP	Tre+SAP
	p__Firmicutes	47.7114	27.1857	40.6308	20.4057	f__Lachnospiraceae	20.3985	7.82376	6.90441	6.26058
	p__Bacteroidota	27.0778	42.09	23.9505	42.3524	f__Muribaculaceae	17.9144	33.8809	16.6149	33.702
	p__Verrucomicrobiota	13.5101	16.7303	22.639	24.5121	f__Akkermansiaceae	13.5092	16.7238	22.6137	24.5102
	p__Actinobacteriota	4.6104	6.12651	2.13973	2.21704	f__Lactobacillaceae	10.1901	4.99302	23.0098	2.96172
	p__Deferribacterota	3.05249	2.67082	2.17485	1.8491	f__Erysipelotrichaceae	8.62234	6.51973	2.48931	3.57259
	p__Desulfobacterota	1.76312	1.18936	1.62118	1.67167	f__Rikenellaceae	6.75437	5.16054	5.29296	6.05013
	p__Proteobacteria	1.23697	2.68969	4.52919	4.32591	f__Bifidobacteriaceae	3.10492	3.25116	1.09064	1.46691
	p__Cyanobacteria	0.119467	0.0535107	0.0551759	0.0170391	f__Deferribacteraceae	3.05249	2.67082	2.17485	1.8491
	p__Acidobacteriota	0.0179931	0.0145073	0.0623996	0.121172	f__Oscillospiraceae	1.68128	1.2208	1.37077	1.23155
	p__Spirochaetota	0.0275102	0.0380378	0.0245655	0.016267	f__Clostridia_UCG-014	1.57327	2.05846	1.85112	1.99332
	Others	0.872718	1.21149	2.17249	2.51165	Others	13.1992	15.697	16.5876	16.4019
Figure 4c	LEFSe analysis
	Microbial names	Logarithm value	Groups	LDA value	p value	Note
	p__Elusimicrobiota	1.57424	Tre	4.03189	0.0363942
	p__Bacteroidota	5.62878	Tre	4.89741	1.30287e-06	Top10
	p__Planctomycetota	1.59318	Tre	4.26254	0.0363632
	p__Firmicutes	5.68199	BC	5.0247	6.45472e-07	Top10
	p__Deferribacterota	4.48677	BC	3.64705	0.047647	Top10
	p__Entotheonellaeota	0.783947	Tre	4.20035	0.0175166
	p__Proteobacteria	4.4363	Tre	3.83795	0.047647	Top10
	f__Atopobiaceae	4.05354	Tre	3.60159	0.00288846
	f__Deferribacteraceae	4.49593	BC	3.5527	0.0439102	Top10
	f__Lachnospiraceae	5.32071	BC	4.82616	7.7069e-07	Top10
	f__Lactobacillaceae	5.01928	BC	4.42371	8.02058e-05	Top10
	f__Rikenellaceae	4.84041	BC	3.9232	0.0125194	Top10
	f__Muribaculaceae	5.53976	Tre	4.91179	1.5485e-06	Top10
Figure 4d	LEFSe analysis
	Microbial names	Logarithm value	Groups	LDA value	p value	Note
	p__Bacteroidota	5.6365	Tre+SAP	4.95624	7.7069e-07	Top10
	p__Firmicutes	5.6196	SAP	5.00161	1.83834e-06	Top10
	p__Halanaerobiaeota	1.04409	SAP	3.70503	0.0363942
	f__Solibacteraceae	1.11131	SAP	3.55552	0.0363942
	f__Saccharimonadales	0.978973	SAP	3.89116	0.00821581
	f__Ktedonobacteraceae	0.661068	SAP	4.51569	0.0363942
	f__Caldilineaceae	1.42216	SAP	3.54932	0.0175166
	f__Coleofasciculaceae	2.32676	SAP	3.565	0.0363942
	f__Marinobacteraceae	0.874646	SAP	4.01082	0.0363942
	f__Fusibacteraceae	1.12839	SAP	3.79874	0.0300996
	f__Cytophagaceae	1.06256	SAP	3.89792	0.00821581
	f__Halanaerobiaceae	1.05159	SAP	3.72553	0.0363942
	f__Alicyclobacillaceae	1.06794	SAP	3.79468	0.0363942
	f__Lactobacillaceae	5.37866	SAP	5.01909	6.45472e-07	Top10
	f__Muribaculaceae	5.54238	Tre+SAP	4.96469	7.7069e-07	Top10
	f__Subgroup_17	1.34672	SAP	3.604	0.0175166
Figure 4e	PCA analysis
	id	PC1(28.4%)	PC2(6.3%)	Groups
	BC1	-26.7686	5.89316	BC
	BC2	-26.7498	-0.283909
	BC3	-33.6216	0.694957
	BC4	-14.6383	-9.84721
	BC5	-18.945	-3.27467
	BC6	-15.9466	-4.54
	BC7	-16.4205	-9.7871
	BC8	-19.6381	-2.68821
	BC9	-17.7517	5.90672
	BC10	-9.96237	-9.18696
	BC11	-16.1056	-0.596513
	BC12	-27.5503	-2.66837
	BC13	-23.7486	3.04327
	BC14	-21.4675	-0.575394
	BC15	-19.9349	-6.24165
	BC16	-17.2731	-5.22919
	BC17	-19.4411	-3.61179
	Tre1	-14.192	-3.28355	Tre
	Tre2	-15.9469	9.12752
	Tre3	-20.2375	3.06022
	Tre4	-35.9639	-2.22929
	Tre5	-18.9303	9.28468
	Tre6	-20.2219	8.63128
	Tre7	-38.128	11.2472
	Tre8	-20.5882	-4.4452
	Tre9	-32.1469	-1.27663
	Tre10	-25.1895	-5.38429
	Tre11	-13.627	-5.7537
	Tre12	-21.3408	0.898275
	Tre13	-21.7864	1.34738
	Tre14	-20.9584	-3.56913
	Tre15	-20.908	-2.90456
	Tre16	-27.9045	11.212
	Tre17	-23.6565	2.1962
	SAP1	26.8049	11.5711	SAP
	SAP2	29.3641	2.39969
	SAP3	16.9175	19.1559
	SAP4	24.3016	-42.5063
	SAP5	11.0006	13.613
	SAP6	28.5581	-7.3275
	SAP7	31.4059	-18.7989
	SAP8	22.4759	-16.8155
	SAP9	23.9124	-2.44606
	SAP10	23.9113	-8.17671
	SAP11	23.4011	1.39175
	SAP12	22.0225	-5.55446
	SAP13	14.1646	-24.78
	SAP14	26.4085	2.39896
	SAP15	26.7812	4.05855
	SAP16	29.011	5.11849
	SAP17	22.5931	-8.04074
	TreSAP1	22.8269	11.9258	Tre+SAP
	TreSAP2	22.4963	-3.36151
	TreSAP3	17.3113	9.36759
	TreSAP4	32.5797	4.9859
	TreSAP5	20.097	6.95151
	TreSAP6	13.1156	14.5228
	TreSAP7	13.6131	-0.961262
	TreSAP8	6.36932	6.58369
	TreSAP9	27.2611	14.6844
	TreSAP10	20.7593	9.26989
	TreSAP11	11.691	-16.7025
	TreSAP12	27.9214	4.56537
	TreSAP13	23.2049	36.9582
	TreSAP14	19.9645	-2.23117
	TreSAP15	18.9755	-2.52983
	TreSAP16	17.9956	-3.63015
	TreSAP17	18.4735	-0.825569
Figure 4f,g	Supplementary Table 2
Figure 4h	VIP value by OPLS-DA
	SAP vs. Tre+SAP	SAP vs. BC
	x	y1	y2	y3	y4
	9.9784	12.9817
	1.0118	1.0679
	0.504741		1.40303
	0.0143476				0.0141119
	0.00825465				0.0274465
	0.00686717				0.00113555
	0.00533177				0.0191366
	0.00381658				0.00106052
	0.0146656				0.00949289
	0.00700058				0.00947916
	7.25412	2.31328
	1.00248	1.94059
	2.63394	2.2327
	2.55889	1.06565
	3.76127	4.23952
	0.306619				0.872622
	3.26681	3.01806
	0.996661	2.63937
	0.564562		1.18905
	1.14731	3.76548
	1.4209	1.99128
	1.04687	3.4525
	0.281501		2.11705
	0.954444				0.989635
	0.666188				0.928122
	2.17847	1.99029
	0.83643		2.35159
	0.632483				0.419426
	0.164811		1.34626
	0.891962		1.83208
	0.0518651				0.0410821
	1.19511	1.92442
	0.321364				0.661784
	2.02182	1.18578
	0.190708		1.36779
	1.99269	1.15215
	0.492803		1.19344
	1.05017	1.25659
	2.40769			0.698904
	1.16802	1.12542
	0.166792				0.138029
	1.26713			0.30463
	0.304473		1.17375
	0.00822449		1.5587
	0.00556762		1.65077
	0.100942		1.03231
	1.88435			0.292749
	1.52829			0.717776
	2.46734			0.93901
	0.0206738		1.3175
	0.31011		1.49172
	1.12018			0.406381
	0.437957				0.668476
	1.6414			0.200473
	0.31744		1.15819
	0.549976				0.702675
	0.0432208		1.23334
	2.1443			0.965545
	0.0681858				0.240632
	0.577621				0.75287
	0.470957				0.40062
	0.132863				0.568535
	0.906272				0.59562
	0.243034				0.68967
	1.32196			0.638468
	0.011506				0.185411
	0.583895				0.489128
	0.157657				0.183959
	1.11162			0.261652
	0.616228				0.124451
	1.09223			0.637066
	0.94819				0.558062
	0.382861				0.748962
	1.28037			0.392179
	0.648008				0.89271
	0.395991				0.90184
	0.591081				0.580343
	0.368833				0.0603914
	0.3248				0.870503
	0.536473				0.154348
	0.369412				0.552292
	0.737307				0.592858
	0.928927				0.664034
	1.49126			0.247635
	0.578444				0.262513
	0.58466				0.246053
	0.481718				0.763161
	0.104427				0.45758
	0.190013				0.22604
	0.839562				0.31329
	0.244041				0.090476
	0.356541				0.513292
	0.610107				0.263879
	0.55115				0.192771
	0.342959				0.187783
	0.448716				0.740284
	0.241584				0.634631
	0.382381				0.424281
	0.648044				0.050999
	0.00657796				0.460158
	0.695739				0.333794
	0.362649		1.56094
	0.0553267				0.598491
	0.370192				0.465307
	0.386548				0.627909
	0.487294				0.615789
	0.547173				0.323525
	0.186274				0.436323
	0.711464				0.611397
	0.409228				0.498027
	0.439299				0.539246
	0.0516168				0.517919
	1.7386	1.0762
	0.99774	1.25559
	0.0939116				0.527871
	0.44501				0.0138962
	0.0116786				0.206983
	0.39245				0.288978
	0.384492				0.14842
	0.258934				0.503797
	0.135415				0.422077
	0.429069				0.335762
	0.307573				0.11574
	0.140649				0.398497
	0.907255				0.757835
	0.00389058				0.499951
	0.151535				0.403614
	0.345208				0.0182895
	0.209658				0.200429
	0.746753				0.273796
	0.376297				0.401377
	0.365909				0.317963
	0.303693				0.13572
	0.199197				0.235311
	0.344985				0.392406
	1.64282			0.78688
	0.0324582				0.334263
	0.412529				0.166652
	0.330537				0.0537917
	0.0790701				0.0633904
	0.355148				0.429553
	0.353014				0.320578
	0.378507				0.347479
	0.258266				0.398501
	0.0156444				0.404624
	0.387662				0.229165
	0.49448				0.254211
	0.462561				0.30353
	0.2048				0.304182
	0.133741				0.365782
	0.281495				0.409743
	0.225723				0.241233
	0.197571				0.322127
	0.109481				0.183576
	0.199585				0.247944
	0.188731				0.352683
	0.0257122				0.283655
	0.105615				0.796232
	0.245864				0.369922
	0.227855				0.173586
	0.323396				0.0944139
	0.118762				0.240153
	0.363291				0.046425
	0.314957				0.129189
	0.422648				0.396829
	0.116395				0.175824
	0.491517				0.233171
	0.0498401				0.189397
	0.0999741				0.635491
	0.00545218				0.101395
	0.408981				0.205956
	0.169403				0.276466
	0.20338				0.249048
	0.297283				0.201938
	0.245096				0.190017
	0.284893				0.0295912
	0.0157172				0.0145918
	0.100021				0.178011
	0.246205				0.180821
	0.104008				0.928172
	0.207554				0.147758
	0.0456147				0.152641
	0.0282321				0.183633
	0.0798612				0.146499
	0.106188				0.0779941
	0.0527608				0.0479046
	0.0495401				0.134073
	0.102955				0.121093
	0.175211				0.214358
	0.162962				0.135008
	0.368736				0.518538
	0.167905				0.192312
	0.110397				0.137705
	0.158111				0.181487
	0.12632				0.171761
	0.022476				0.0473066
	0.0495179				0.138886
	0.024283				0.103402
	0.0648927				0.0243561
	0.116891				0.00681876
	0.190893				0.119827
	0.0789118		1.05436
	0.0649177				0.0351397
	0.201204				0.0379923
	0.152743				0.108585
	0.0594632				0.0276995
	0.110361				0.103706
	0.0657623				0.0509997
	0.174231				0.0487165
	0.0744795				0.11109
	0.0799621				0.120048
	0.00687843				0.0273025
	0.341266				0.143622
	0.0480468				0.111772
	0.0945922				0.000557875
	0.131834				0.0137457
	0.0932253				0.11454
	0.00794459				0.0425724
	0.10165				0.139511
	0.00175496				0.043995
	0.0957986				0.0128635
	0.0464023				0.0818029
	0.144399				0.0507301
	2.75385	5.43847
	0.624298				0.450076
	0.0871652				0.0896833
	0.114399				0.073223
	0.0805802				0.0101766
	0.0340139				0.0916717
	0.026063				0.0492311
	0.0931629				0.0157269
	0.174039				0.0972978
	0.00626701				0.113036
	0.141494				0.0230466
	0.06006				0.0935015
	0.347389				0.301143
	0.112034				0.0298629
	0.0863209				0.0756189
	0.0741214				0.0866187
	0.0360972				0.00875757
	0.0255714				0.0304816
	0.0276772				0.0223219
	0.0185769				0.015655
	0.0116225				0.0151169
	0.299223				0.322124
	1.0334			0.368691
	0.0123388				0.769892
	0.0379825				0.227893
	11.4223	3.91379
	4.95104	11.2118
	0.934897		9.09304
	0.48514		10.6389
	1.6733	12.2286
	5.3277	8.2209
	4.0839	3.82132
	3.2526	2.67786
	11.1482	2.44472
	0.435586				0.237371
	2.73865	2.70449
	5.20488	1.98094
	9.20215	3.23124
	2.33521	4.23613
	2.02746	3.55469
	2.87331	3.12357
	1.73175	1.90022
	0.538378		2.88707
	1.7144	2.45219
	2.41568	2.63354
	0.0787693				0.572618
	1.01264			0.915841
	0.167932		2.71611
	0.901543		1.39458
	0.48667		2.80554
	1.01178	1.61414
	2.26474	2.08856
	4.49436	1.36899
	0.358853		1.25599
	0.698471				0.391663
	0.852678		1.18392
	0.243747				0.387684
	1.13742	1.70953
	1.93352	1.41647
	0.700011		2.48086
	0.0875871				0.954398
	1.19239	1.50837
	1.93586			0.0161598
	0.370553				0.654761
	0.0727153		1.4572
	0.00984525		1.23905
	0.897341				0.86662
	0.462203				0.470816
	0.414606		1.351
	0.171936		1.25521
	0.761406		1.832
	0.927968		1.30916
	0.308058		1.01673
	2.06255			0.847161
	0.74819		1.27127
	0.706748		1.73517
	0.791482		1.1244
	2.10149			0.0589942
	0.527812				0.110335
	0.998873			0.487614
	0.788806				0.582066
	0.346052				0.984608
	0.461279				0.513051
	0.508034				0.211363
	0.679267				0.690889
	0.651915				0.683125
	1.26455			0.200634
	0.674538				0.340319
	0.584759				0.295979
	0.641129				0.276672
	0.452983		1.18403
	0.146543				0.902881
	1.33923			0.37115
	0.448041				0.94914
	0.393396		1.15144
	1.57188			0.861701
	0.703366				0.287657
	1.20053			0.661997
	0.771366				0.666192
	0.17345				0.350344
	0.100217				0.054096
	0.154151				0.518487
	0.55366		1.38443
	0.276377				0.151674
	0.527057				0.390441
	0.297678				0.506344
	0.222911				0.960275
	1.3686			0.766207
	1.22161			0.740407
	0.559817		1.04709
	0.0855222				0.696982
	5.18898	2.09891
	11.7511	2.86861
	0.192543				0.480233
	0.0903176				0.528122
	0.135419				0.617516
	0.779505				0.749153
	1.02693			0.503395
	1.22689			0.634865
	0.0457717				0.68129
	0.203923				0.828321
	1.82294			0.126725
	0.00872266				0.00316444
	4.06757	5.14405
	0.188503				0.812736
	0.313517				0.426507
	0.368607				0.380744
	0.233821				0.78014
	0.474878				0.610417
	0.290584				0.804706
	0.404508				0.773602
	0.24037				0.69886
	0.194111				0.430034
	0.907516				0.405005
	4.85471	4.57729
	0.0753444				0.369123
	0.463214				0.902079
	0.721252				0.486225
	0.0438589				0.21721
	0.948013				0.704925
	0.652545				0.103231
	0.305503				0.213458
	0.32873				0.618983
	1.09414			0.60072
	0.0254637				0.629487
	3.51503	5.13531
	0.974929				0.351926
	0.63389				0.253753
	0.397182				0.70789
	0.26596				0.517319
	0.432608				0.436255
	0.607103				0.724692
	0.391975				0.0470083
	0.442276				0.812134
	0.439945				0.39615
	0.361818				0.593316
	3.08691	2.94477
	0.758867				0.505114
	0.0519093				0.00952105
	0.421133				0.309005
	0.195145				0.929712
	0.243218				0.480275
	1.03681			0.52678
	0.210489				0.679646
	0.243327				0.260917
	0.603691				0.622726
	0.114917				0.415813
	5.26498	1.90004
	0.801486				0.788105
	0.311715				0.478975
	1.13998			0.518688
	0.168413				0.413364
	0.556968				0.14346
	0.713785				0.350919
	0.208336				0.273879
	0.369304				0.489405
	0.0629616				0.394298
	0.112193				0.662022
	2.60987	1.06586
	0.227377				0.213832
	0.0745601				0.351289
	0.0482298				0.645943
	0.109126				0.539891
	0.383322				0.221791
	0.229298				0.408645
	0.268121				0.614688
	0.33428				0.419524
	0.314414				0.536354
	0.181803				0.530696
	3.26112			0.921045
	0.0476375				0.576742
	0.310953				0.281253
	0.431628				0.334793
	0.175868				0.0155774
	0.557576				0.388481
	0.144838				0.0461239
	0.152375				0.00584186
	0.0836821				0.293375
	0.0869836				0.540794
	0.0199348				0.528794
	0.619347				0.397861
	0.574565				0.225621
	0.391699				0.238108
	0.0172997				0.0777715
	0.108642				0.52488
	0.437329				0.383122
	0.344107				0.175306
	0.240904				0.410725
	0.386377				0.166
	0.347219				0.522065
	0.255238				0.225346
	0.990533		2.9944
	0.201845				0.292337
	0.692304				0.0817144
	0.66224				0.113539
	0.387796				0.00966472
	0.365291				0.226848
	0.0781712				0.349177
	0.101318				0.305708
	0.178298				0.342902
	0.136204				0.214999
	0.198823				0.121244
	2.44977			0.248414
	3.2162	1.05444
	0.234225				0.0511508
	0.00231541				0.00321661
	0.383197				0.255955
	0.0440869				0.0281143
	0.427031				0.120322
	0.256626				0.479557
	0.152483				0.421024
	0.187723				0.479838
	0.00414693				0.136989
	0.263666				0.0987633
	0.248374				0.377644
	0.0104336				0.0138001
	0.0682922				0.306835
	0.217667				0.366304
	0.198981				0.141327
	0.0908889				0.0245325
	0.24332				0.300494
	0.184823				0.0475408
	0.250925				0.171937
	0.273587				0.344014
	0.257885				0.0531482
	0.519388		2.70083
	0.0296064				0.0838062
	0.505855				0.0882507
	0.0136557				0.311334
	0.411389				0.271283
	0.0971777				0.288473
	0.0550106				0.302365
	0.419913				0.115697
	0.196596				0.263595
	0.244609				0.308213
	0.051415				0.373129
	1.15319			0.0645586
	0.263413				0.0424098
	0.165634				0.100036
	0.347697				0.265491
	0.0119383				0.0838712
	0.264588				0.00678298
	0.108357				0.286022
	0.353075				0.283498
	0.177646				0.29933
	0.387565				0.164531
	0.0244768				0.191497
	1.29183	1.49243
	0.221816				0.173999
	0.429247				0.130468
	0.242996				0.0598067
	0.12716				0.351299
	0.355324				0.138258
	0.389992				0.199008
	0.154588				0.0745353
	0.0478404				0.129651
	0.0561581				0.0932804
	0.0832462				0.248741
	1.60496			0.214635
	0.405251				0.0813697
	0.195261				0.29677
	0.156403				0.294153
	0.173757				0.0558368
	0.436299				0.00981082
	0.0320654				0.125137
	0.147667				0.336798
	0.0805012				0.17224
	0.133315				0.158567
	0.0382745				0.136903
	0.37293		2.17428
	0.342713				0.0275037
	0.274948				0.216875
	0.000112833				0.130161
	0.0374151				0.0127543
	0.229062				0.0561531
	0.118419				0.146451
	0.0319184				0.118219
	0.159378				0.279534
	0.332396				0.219107
	0.0804316				0.28099
	0.47001		2.46934
	0.0450711				0.16541
	0.360639				0.0782953
	0.121763				0.153772
	0.0965348				0.051072
	0.212311				0.186811
	0.235288				0.217438
	0.0884623				0.143258
	0.240784				0.0612548
	0.0295015				0.205769
	0.127642				0.0564741
	1.67889			0.678735
	0.16573				0.220495
	0.0171198				0.0230851
	0.0238172				0.0483606
	0.0655612				0.128391
	0.0974814				0.123925
	0.0583624				0.0913567
	0.200429				0.0336495
	0.263934				0.0207494
	0.264727				0.0529278
	0.062514				0.107467
	1.90388			0.145503
	0.138343				0.0910682
	0.161422				0.0370117
	0.306127				0.177401
	0.0443071				0.0601009
	0.334469				0.0805149
	0.0496421				0.184708
	0.0239995				0.189048
	0.0866943				0.0841631
	0.0342127				0.0518309
	0.0313849				0.184305
	2.39686			0.707406
	0.478689		1.63094
	0.192991				0.105894
	0.151482				0.0139776
	0.179575				0.164162
	0.0948631				0.0952459
	0.173745				0.0736168
	0.0411709				0.125839
	0.203162				0.0880768
	0.246694				0.0627675
	0.206019				0.129624
	0.0048196				0.02308
	1.34615			0.726956
	0.0826975				0.126794
	0.0655735				0.0804237
	0.0978916				0.0566051
	0.102105				0.124688
	0.0277112				0.0618232
	0.138308				0.0715466
	0.18279				0.171312
	0.126758				0.020175
	0.175946				0.026245
	0.183824				0.0615761
	0.913489				0.276283
	0.0640668				0.0589666
	0.160745				0.125075
	0.125095				0.0764746
	0.266666				0.00661402
	0.166262				0.102681
	0.0419627				0.0220377
	0.00311051				0.130023
	0.0734894				0.169138
	0.186655				0.0659944
	0.234909				0.0390484
	0.120377		1.12789
	0.0372331				0.139805
	0.0841248				0.114578
	0.0755373				0.00103254
	0.161276				0.111483
	0.0700796				0.184756
	0.0766514				0.0165642
	0.0110534				0.132472
	0.245561				0.0576995
	0.133054				0.0433318
	0.10829				0.110498
	0.0512111				0.57624
	0.0389627				0.128782
	0.104849				0.142583
	0.0943345				0.1685
	0.0604555				0.0935279
	0.0566401				0.0361078
	0.0786193				0.116072
	0.0223603				0.0669262
	0.179355				0.0147442
	0.0311618				0.0568689
	0.137137				0.127292
	1.00843			0.808628
	0.0203584				0.0815803
	0.153119				0.0970126
	0.0130996				0.119088
	0.0593739				0.0579939
	0.109185				0.0581546
	0.0862106				0.0571729
	0.0134598				0.119874
	0.0332459				0.0722873
	0.171947				0.0847386
	0.0856488				0.0223092
	0.58971		1.60779
	0.0405365				0.107985
	0.0301372				0.127011
	0.0693613				0.0623185
	0.0140189				0.0925166
	0.152212				0.0550508
	0.0229134				0.0398419
	0.0778316				0.0520585
	0.000159281				0.0720661
	0.0908838				0.0329068
	0.0583755				0.0271418
	0.721191		1.34906
	0.172749				0.011366
	0.0107395				0.00600594
	0.0514731				0.056564
	0.0323562				0.0713041
	0.041405				0.00151897
	0.0289367				0.0458888
	0.0286655				0.0567855
	0.0103762				0.0695333
	0.115499				0.0776117
	0.0147351				0.0134642
	1.43948			0.124397
	0.00493927				0.0222725
	0.0482087				0.0328602
	0.117838				0.0712486
	0.107412				0.035142
	0.107844				0.0357282
	0.0379344				0.051541
	0.0233831				0.0511153
	0.0781331				0.035536
	0.0430563				0.063015
	0.0145559				0.118302
	1.11052			0.320443
	0.137709				0.0660478
	0.0112668				0.0907293
	0.120055				0.0289633
	0.0285712				0.0655534
	0.0693624				0.0697673
	0.0542094				0.00823979
	0.127538				0.0380437
	0.0517045				0.0411536
	0.00479832				0.0247433
	0.0204145				0.0930411
	0.462562		3.48369
	0.00428239				0.454407
	0.00488087				0.102295
	0.0473001				0.103955
	0.00709295				0.087213
	0.00368629				0.0221971
	0.112757				0.0205599
	0.0865425				0.0760799
	0.00692102				0.0404029
	0.0615713				0.0300674
	0.055089				0.0622754
	0.00820366				0.0740597
	0.675		1.24264
	0.0182024				0.0691565
	0.0871609				0.0320734
	0.105658				0.00356909
	0.000115705				0.0703749
	0.0852072				0.0123106
	0.115154				0.0301461
	0.0617648				0.0194532
	0.0641112				0.0735335
	0.0509835				0.0206864
	0.0102796				0.0207528
	0.299706				0.565407
	0.00409544				0.0105774
	0.0107783				0.0339933
	0.0578393				1.32106e-05
	0.0415153				0.0210054
	0.0385919				0.0185693
	0.0340697				0.0180646
	0.0363986				0.00806593
	0.0047836				0.0403631
	0.0204562				0.00434255
	0.0293507				0.0258398
	0.715123				0.196286
	0.0117833				0.0168761
	0.0103139				0.00850995
	0.00367618				0.0194285
	0.00051142				0.00713088
	0.0208257				0.00341402
	0.0269399				0.021752
	0.0167374				0.0042136
	0.0297972				0.000693825
	0.023328				0.0208728
	0.0175531				0.00519724
	0.4249		1.81327
	0.00117733				0.0195361
	0.0355304				0.0060634
	0.836587				0.976803
	1.50563	1.03304
	1.7982	1.55538
	0.360802				0.215098
	0.372162				0.465281
	0.193032				0.881602
	1.36445			0.613934
	3.825	1.55858
	1.12148	1.72961
	1.07266	1.61658
	2.48544	4.54643
	1.54221	1.49982
	0.485297				0.9695
	1.53048			0.219406
	0.170196				0.610084
	0.0727098				0.363407
	0.0578945				0.155236
	1.47816	1.14978
	0.233788				0.29261
	0.260506		1.62539
	1.06146			0.470926
	0.454136				0.411014
	1.35344			0.638325
	0.790449		1.01066
	0.217757				0.408625
	2.98267	2.09343
	0.82129		1.1926
	0.154457				0.228956
	0.154623				0.810009
	0.218619				0.1235
	0.121182		1.24346
	0.165084				0.272563
	0.428713				0.472656
	0.215437		2.99543
	0.367574				0.425656
	0.726615				0.94116
	0.200357				0.488333
	0.762276				0.0876929
	4.43309	1.41432
	0.000429831				0.40822
	0.424932				0.160925
	1.35978			0.303051
	0.29549				0.497547
	0.158355				0.551128
	0.498033				0.33432
	0.671784				0.59244
	0.381836		1.33016
	0.187795				0.264664
	0.358177				0.385125
	0.0831405				0.0987671
	0.730273				0.409151
	0.205959				0.0553999
	0.202904				0.560084
	0.371253				0.848077
	0.0521172				0.22098
	2.01299			0.759385
	0.0236732				0.126579
	1.24291			0.555941
	0.190121				0.0672127
	0.272861				0.110345
	1.0822			0.633857
	2.57048	1.10348
	0.0278702				0.0217095
	0.100506				0.120907
	0.273726				0.56864
	0.449887				0.157425
	0.373476				0.0575761
	0.32246				0.739505
	0.149505				0.0679327
	0.0783983				0.300753
	2.93147			0.964074
	0.348666				0.096049
	0.203217				0.0198354
	0.606089				0.00554812
	0.0016467				0.275113
	1.53563			0.69401
	0.484388				0.0253401
	0.458065				0.367323
	0.193609				0.186709
	0.343224		2.10556
	0.883358				0.393866
	0.942206				0.136933
	0.704871				0.310746
	0.327582				0.182257
	1.03232			0.455799
	0.362441				0.320062
	0.231637				0.734106
	0.136007				0.174006
	0.316133		1.16215
	1.35743			0.418826
	1.21965	5.3495
	0.745352				0.346131
	0.320314				0.12482
	0.0691628				0.361241
	0.292115				0.00267047
	0.0959017				0.0839186
	0.063025				0.378287
	0.212237				0.828887
	0.199765				0.0201957
	0.132652				0.249112
	0.527812				0.439095
	1.22206			0.471879
	1.51706			0.175645
	0.280402				0.352273
	0.849918				0.548808
	0.349304				0.223919
	0.156306				0.249338
	0.0010574				0.165236
	0.153084				0.175106
	0.265764				0.312513
	0.339626				0.256097
	1.011	1.129
	0.280113				0.270254
	0.0590316				0.0934143
	0.0906307				0.141487
	0.15716				0.139098
	0.457672				0.377328
	0.0917861				0.433905
	0.21878				0.215904
	0.342461				0.202265
	0.353026				0.417134
	0.731444				0.485761
	0.370831				0.216274
	0.117374				0.0806214
	0.112617				0.700926
	0.505105				0.0181265
	0.184344				0.152272
	0.427521				0.246038
	0.797856				0.426862
	0.965244				0.467946
	0.883186				0.724294
	0.0447817				0.0800194
	0.136489				0.22901
	0.0740137				0.223848
	0.179623				0.220811
	2.95446			0.983687
	0.486429				0.228609
	0.309661				0.108181
	0.28204				0.00612354
	0.176398				0.0589537
	0.931703		1.17674
	0.739507		1.10603
	0.82657		1.09563
	0.331343				0.13392
	0.190375				0.810459
	0.400061				0.0310899
	0.409316				0.0490228
	0.344919		1.62878
	0.0818551				0.238811
	0.157844				0.0195118
	0.0228842				0.615545
	0.177643				0.0123222
	1.00353	1.29008
	0.149229				0.20269
	0.215752				0.823594
	0.181413				0.1407
	0.242631				0.106145
	0.190273				0.0935281
	0.12663				0.231902
	0.101144				0.0893738
	0.943703				0.362052
	0.00941302				0.281151
	0.769899		2.07693
	0.293665				0.0725062
	0.365942				0.122889
	0.162365				0.0760013
	0.085568				0.0519105
	0.167363				0.454963
	0.0250381				0.0592018
	0.112654				0.152821
	0.0118592				0.107588
	0.798777				0.733844
	0.0158978				0.0261328
	0.0485262				0.0694783
	1.24446	1.91235
	0.0178556				0.461174
	0.0852353				0.0841926
	0.222938				0.172511
	0.129857				0.103312
	1.8643	2.25226
	0.432819				0.12972
	0.0182123				0.0926393
	0.0268573				0.179285
	0.672936		2.41125
	0.0741343				0.0325021
	1.08611			0.493455
	0.658826				0.873974
	0.214625				0.060474
	0.0569517				0.0638112
	1.97146			0.776854
	0.485413				0.175534
	0.446559				0.0797311
	0.0767249				0.0321707
	0.474546				0.52771
	0.0697881				0.10541
	0.00864901				0.00978577
	0.254513				0.0227912
	2.05784			0.0182226
	0.10182				0.0310991
	0.190771				0.870341
	0.166793				0.0743389
	1.06942			0.991516
	1.42829			0.611401
	0.861984		1.13597
	1.66244			0.0724083
	0.393869		1.9316
	0.588617				0.225932
	1.16619			0.915081
	0.61538				0.801828
	0.000444289				0.00717556
	0.298982		1.152
	0.0707094				0.380723
	1.11682			0.866395
	1.77685			0.623792
	0.731921				0.112157
	1.43937			0.752577
	1.50358			0.225787
	0.297371		1.09139
	1.19182			0.73773
	0.324493				0.253701
	0.0916071				0.539478
	0.33366				0.284066
	0.735786		1.01268
	1.02496			0.303737
	0.272357				0.222873
	0.420327		1.19509
	0.11609				0.0361852
	0.0167873				0.272056
	3.32535			0.767902
	0.692312				0.113534
	0.464106				0.259551
	0.184462				0.658964
	0.272456				0.669576
	0.388035				0.21499
	0.226636		1.11488
	0.66416				0.293861
	0.487857				0.576245
	0.528545		1.12644
	0.570454				0.479036
	1.63096	1.99552
	1.59845			0.588846
	0.262862				0.0542952
	0.493834				0.653469
	0.265488				0.282983
	0.321926				0.592432
	0.64501				0.763847
	0.435695				0.658761
	0.4923				0.716478
	0.00895397				0.845142
	0.0696984				0.559762
	0.658498		2.50442
	0.802678				0.490832
	0.500639				0.417194
	0.666175				0.536625
	0.686822				0.147155
	0.764901				0.179286
	0.0364686				0.797906
	0.319854				0.799125
	0.0930638				0.698276
	0.278726				0.544937
	0.538788				0.408177
	1.64874	1.80657
	0.475636				0.497071
	0.489546				0.0277819
	0.170557				0.952734
	0.198945				0.0935691
	0.485737				0.467135
	0.681027				0.558245
	0.80102				0.501328
	0.738651				0.0932604
	0.530811				0.685939
	0.140561				0.637224
	0.0456488		1.77605
	0.206728				0.382948
	0.203235				0.354485
	0.0899134				0.857008
	0.413851				0.771304
	0.00589368				0.475592
	0.149876				0.304392
	0.389789				0.455996
	0.295684				0.0159431
	0.689477				0.45155
	0.193067				0.166626
	1.08149			0.551099
	0.206591				0.446545
	0.501704				0.235832
	0.336358				0.0576772
	1.41631			0.571755
	0.460819				0.768943
	0.0615852				0.193798
	0.411194				0.492462
	0.0527715				0.49922
	0.581923				0.0456282
	0.0601166				0.305505
	0.102078		1.31649
	0.614451				0.0740377
	0.260174				0.365462
	1.00782			0.842439
	0.712203				0.7857
	1.05433			0.522133
	1.00765			0.622613
	0.731764				0.102842
	0.274894				0.0889801
	0.0354269				0.183209
	0.0471434				0.327299
	1.23485			0.309675
	0.720568				0.885803
	0.297892				0.0229872
	0.551921				0.736471
	0.304364				0.648687
	0.411744				0.0633571
	0.133684				0.0963615
	0.448947				0.133007
	0.00173903				0.0910635
	0.142658				0.0982142
	0.0849528				0.0107461
	0.30796				0.623884
	0.556295				0.577511
	0.369474				0.310324
	0.341804				0.673143
	1.08625			0.420198
	0.517917				0.38742
	0.332977				0.56603
	0.340442				0.433585
	0.667976				0.502606
	0.564052				0.0515205
	0.354368				0.243392
	1.11609	1.25721
	0.496512		1.62173
	0.207207				0.262209
	0.316447				0.600698
	0.831036				0.11586
	0.412495				0.583399
	0.349038				0.358481
	0.071838				0.528452
	0.999197			0.0435811
	0.258025				0.201635
	0.760475				0.0581462
	0.458753				0.395656
	2.39932	0.99842
	0.115798				0.595867
	0.467937				0.347168
	0.559875				0.325566
	0.079089				0.387122
	0.349753				0.310927
	0.366302				0.0509522
	0.192487				0.0111016
	0.281559				0.415842
	0.324865				0.104001
	0.317683				0.442391
	1.14012			0.592479
	0.24911				0.169386
	0.0765523				0.289278
	0.371267				0.602248
	0.110544				0.257626
	0.234561				0.0709385
	0.43233				0.000779832
	0.268842				0.180791
	0.734302				0.34963
	0.702906				0.50865
	0.36678				0.144588
	0.379426		1.70962
	0.376166				0.390309
	0.093064				0.223418
	0.779255				0.291361
	0.276829				0.316013
	0.44826				0.19261
	0.287468				0.0482631
	0.0372519				0.636549
	0.854402				0.380601
	0.118264				0.430429
	0.022582				0.000466345
	0.391493		1.0334
	0.184179				0.137708
	0.0518398				0.595582
	0.527687				0.0669495
	0.131905				0.387449
	0.232061				0.0986927
	0.2275				0.0667685
	0.720447				0.365577
	0.517368				0.251515
	0.106526				0.516497
	0.193179				0.283774
	1.81777			0.322266
	0.344572				0.311781
	0.117389				0.439257
	0.209373				0.427179
	0.139753				0.706788
	0.458624				0.0131852
	0.243418				0.238792
	0.245643				0.199561
	0.859238				0.177785
	0.813091				0.15061
	0.409024				0.118928
	2.10322	1.05429
	0.0415628				0.288822
	0.311064				0.634274
	0.149094				0.269014
	0.501536				0.479899
	0.472513				0.480434
	0.0922192				0.289323
	0.490471				0.115337
	0.248152				0.417497
	0.0969138				0.0145525
	0.272773				0.0602716
	0.719883				0.516021
	0.44978				0.26356
	0.58066				0.283161
	0.360912				0.375052
	0.732214				0.125381
	0.238823				0.250116
	0.0256099				0.150426
	0.51561				0.182905
	0.113102				0.151227
	0.703813				0.2222
	0.408336				0.180936
	0.39058				0.810122
	0.688842				0.270823
	0.401134				0.261157
	0.178557				0.309846
	0.622017				0.0386621
	0.268091				0.262651
	0.215616				0.276144
	0.572067				0.222418
	0.479895				0.150617
	0.0147646				0.231137
	0.409772				0.146742
	0.65938				0.610596
	0.502047				0.0822728
	1.11522			0.516876
	0.392707				0.42513
	0.0777219				0.279082
	0.403397				0.374578
	0.0892978				0.277016
	0.146684				0.398483
	0.511748				0.0437536
	0.600067				0.288422
	0.543103				0.419148
	0.69835		4.19806
	0.674541				0.151903
	0.0320582				0.438103
	0.185753				0.236703
	0.308381				0.218532
	0.606142				0.0120748
	0.50483				0.130616
	0.592867				0.307046
	0.0669129				0.454719
	0.0561584				0.0838253
	0.305285				0.318731
	0.209425				0.155908
	0.517263		1.24916
	0.24257				0.105633
	0.589791				0.116338
	0.638269				0.0675543
	0.296675				0.294231
	0.227262				0.403553
	0.0017396				0.0348934
	0.383261				0.525457
	0.162116				0.391632
	0.15223				0.443433
	0.327166				0.359848
	0.519149		1.13778
	0.405787				0.393636
	0.507255				0.27816
	0.250474				0.318635
	0.33476				0.405671
	0.285094				0.0673778
	0.0721023				0.0161411
	0.348039				0.284314
	0.073572				0.556339
	0.0840386				0.431536
	0.476809				0.00821744
	0.929666				0.471705
	0.142235				0.0499233
	0.499363				0.0031851
	0.388941				0.344631
	0.0211128				0.0246872
	0.0302574				0.272528
	0.540743				0.0388366
	0.108387				0.371647
	0.371475				0.0160354
	0.590499				0.118073
	0.00186789				0.574704
	1.27028			0.135215
	0.237572				0.340425
	0.560285				0.176748
	0.123385				0.349564
	0.454278				0.0247362
	0.505381				0.264491
	0.173247				0.446741
	0.282869				0.337876
	0.284792				0.206706
	0.446439				0.108426
	0.269733				0.119293
	0.110168				0.690618
	0.392123				0.383837
	0.134706				0.255819
	0.365213				0.30815
	0.258617				0.355499
	0.0013025				0.448335
	0.105103				0.287566
	0.0509233				0.332799
	0.354942				0.361613
	0.437853				0.285256
	0.0750505				0.198616
	0.750785				0.302999
	0.019211				0.305017
	0.0334384				0.159814
	0.626256				0.267873
	0.219293				0.229222
	0.0421696				0.320768
	0.34172				0.278378
	0.426912				0.232121
	0.202534				0.247139
	0.211592				0.462555
	0.505019				0.179289
	0.385186				0.472144
	0.104469				0.227136
	0.24018				0.104346
	0.431781				0.328523
	0.173874				0.336009
	0.421521				0.147826
	0.576742				0.189966
	0.127136				0.0651474
	0.161698				0.168719
	0.121356				0.139149
	0.129238				0.382686
	0.554718				0.814503
	0.269249				0.160611
	0.568079				0.0517976
	0.407371				0.279082
	0.599191				0.184356
	0.393351				0.164408
	0.330301				0.142384
	0.231572				0.214603
	0.431069				0.0453166
	0.411908				0.0322889
	0.482039				0.250897
	0.661847				0.767265
	0.141074				0.348343
	0.413929				0.252013
	0.423735				0.263918
	0.256742				0.0572632
	0.431867				0.204623
	0.0606286				0.200824
	0.432219				0.395131
	0.0448877				0.267751
	0.192664				0.196826
	0.311421				0.0151375
	1.49482			0.755476
	0.227766				0.40899
	0.530175				0.153155
	0.398952				0.308286
	0.631228				0.282897
	0.215535				0.329706
	0.0626448				0.120565
	0.00294154				0.0773941
	0.129065				0.0919291
	0.413679				0.0328596
	0.0773335				0.305772
	0.0396458				0.0578658
	0.0325143				0.102768
	0.133829				0.0090556
	0.22801				0.0106487
	0.260018				0.404952
	0.406256				0.0637247
	0.0258684				0.345793
	0.186147				0.181838
	0.0720698				0.137395
	0.1258				0.289547
	0.072057				0.231595
	0.18646				0.061175
	0.355844				0.198691
	0.461174				0.0473326
	0.423255				0.0228004
	0.00126545				0.361406
	0.562888				0.290416
	0.0666829				0.34809
	0.501527				0.0145017
	0.0862403				0.311435
	0.370945				0.0331053
	0.224128				0.272282
	0.220485				0.196518
	0.171361				0.449797
	0.348908				0.212087
	0.220048				0.394227
	0.203669				0.314883
	0.0957149				0.104326
	0.13083				0.129722
	0.0233751				0.321412
	0.279528				0.197238
	0.0568333				0.0579077
	0.236938				0.436333
	0.0172584				0.270179
	0.220536				0.0100014
	0.194082				0.229912
	0.086008				0.298708
	0.0531373				0.250953
	0.103352				0.0965047
	0.0105152				0.307512
	0.0952488				0.25356
	0.159588				0.125052
	0.157785				0.162997
	0.187924				0.218794
	0.0485537				0.2122
	0.0731534				0.892245
	0.545903				0.135449
	0.0710048				0.330739
	0.015026				0.31919
	0.461224				0.129938
	0.133807				0.268895
	0.317919				0.248563
	0.253319				0.181525
	0.0935483				0.0688804
	0.12839				0.0472093
	0.230354				0.131754
	0.268833				0.419284
	0.0677913				0.174272
	0.0804171				0.185166
	0.356142				0.238005
	0.137899				0.151724
	0.338188				0.0490314
	0.0442009				0.319036
	0.240635				0.348369
	0.237725				0.227953
	0.173316				0.138613
	0.00809683				0.0818462
	0.364859				0.0488915
	0.120366				0.216586
	0.176297				0.00435428
	0.0881828				0.230257
	0.310025				0.0590139
	0.336804				0.0455821
	0.212106				0.153841
	0.106257				0.0403512
	0.220891				0.11526
	0.0215104				0.0437685
	0.0394155				0.105743
	0.0449429				0.395011
	0.143227				0.0329748
	0.288922				0.391133
	0.126417				0.22049
	0.290099				0.0256014
	0.0351269				0.0941538
	0.335493				0.299928
	0.0687108				0.240616
	0.361221				0.309849
	0.34301				0.302614
	0.15688				0.311029
	0.0654539				0.524956
	0.537277				0.164526
	0.0480792				0.221013
	0.085111				0.355103
	0.0479573				0.257172
	0.130137				0.173306
	0.102248				0.191816
	0.302843				0.0692902
	0.0110242				0.116101
	0.364783				0.0888778
	0.225725				0.219325
	0.0533401		1.38773
	0.362156				0.647419
	0.0983966				0.169136
	0.253729				0.154245
	0.0639291				0.0698474
	0.309904				0.211031
	0.215539				0.207586
	0.177602				0.259026
	0.0227708				0.286075
	0.200545				0.261479
	0.0443187				0.117656
	0.495128				0.238679
	0.515524				0.155394
	0.00422346				0.296067
	0.0869773				0.0670283
	0.169737				0.17483
	0.205964				0.0176315
	0.290385				0.0642615
	0.169814				0.155576
	0.0342721				0.0356966
	0.147926				0.0854225
	0.241508				0.149166
	0.17				0.200778
	0.252132				0.554032
	0.105552				0.0806381
	0.0230493				0.288914
	0.0547197				0.060231
	0.0973778				0.0164253
	0.196147				0.0201542
	0.00664865				0.202776
	0.174828				0.130576
	0.144438				0.254942
	0.164383				0.0174918
	0.00729561				0.202178
	0.0467692				0.835863
	0.18728				0.0306125
	0.12088				0.189627
	0.319229				0.286939
	0.0315911				0.16698
	0.379074				0.133768
	0.185286				0.37076
	0.045426				0.220986
	0.121057				0.132113
	0.213211				0.0549075
	0.0199665				0.139232
	0.159239				0.412797
	0.0635668				0.220445
	0.340614				0.241376
	0.000456129				0.176263
	0.245078				0.129807
	0.175033				0.113101
	0.0327084				0.218751
	0.445519				0.114692
	0.120641				0.216402
	0.147862				0.200079
	0.13662				0.1022
	0.407819				0.578823
	0.510582				0.13555
	0.322175				0.0180733
	0.0423385				0.229602
	0.198791				0.20738
	0.0246826				0.158294
	0.198172				0.118163
	0.00328561				0.218506
	0.364516				0.172236
	0.22879				0.196693
	0.0236101				0.18731
	0.387667				0.595047
	0.299327				0.128676
	0.105437				0.18537
	0.0587645				0.0745248
	0.285262				0.157445
	0.0541871				0.137161
	0.284684				0.21427
	0.0925066				0.023447
	0.0362447				0.053305
	0.0122203				0.19701
	0.0433154				0.167032
	0.0474707				0.643368
	0.442068				0.171896
	0.0902333				0.182299
	0.153254				0.00786808
	0.0667761				0.0410037
	0.115412				0.148224
	0.00421437				0.0585852
	0.159631				0.0163157
	0.340271				0.271951
	0.00493904				0.139773
	0.169525				0.0113326
	0.0321665				0.234332
	0.098627				0.0863849
	0.121862				0.214543
	0.320767				0.155678
	0.0560152				0.186617
	0.207926				0.207799
	0.192974				0.144321
	0.0475056				0.209541
	0.340819				0.0432903
	0.0619105				0.143792
	0.0482035				0.0897591
	0.0404342				0.374161
	0.107886				0.0811272
	0.154816				0.0219486
	0.345419				0.168368
	0.0355094				0.157227
	0.0839479				0.0508782
	0.146032				0.0634403
	0.214922				0.106415
	0.119609				0.245744
	0.156305				0.1945
	0.145839				0.190087
	4.52499	3.5123
	0.229557				0.0449374
	0.227236				0.0211145
	0.0287842				0.14127
	0.131365				0.137225
	0.281325				0.0393123
	0.0452242				0.110693
	0.103831				0.228928
	0.0728972				0.0587436
	0.00171907				0.206141
	0.0380727				0.120651
	0.110118				0.210354
	0.957086				0.28607
	0.117332				0.209622
	0.0622838				0.0836475
	0.0955442				0.17557
	0.258759				0.0566079
	0.102759				0.0205617
	0.078735				0.150176
	0.326149				0.139412
	0.0705219				0.117144
	0.158298				0.158105
	0.285999				0.075209
	0.0432274				0.34012
	0.0197949				0.132813
	0.11743				0.0363064
	0.0391707				0.106622
	0.0184486				0.17478
	0.0950923				0.144474
	0.0144484				0.0722765
	0.158176				0.124295
	0.146175				0.00460797
	0.1389				0.22419
	0.186353				0.0680951
	0.328834				0.462371
	0.0580524				0.189872
	0.283135				0.148188
	0.251472				0.046005
	0.0501733				0.0246438
	0.0734455				0.164378
	0.114929				0.0196393
	0.0638026				0.123625
	0.168118				0.147913
	0.17776				0.135222
	0.00289116				0.157222
	0.0673066				0.0875881
	0.108496				0.0164474
	0.186277				0.0553719
	0.0506249				0.00414737
	0.111275				0.018303
	0.0938202				0.11529
	0.142688				0.0931001
	0.114971				0.0870215
	0.00361362				0.203413
	0.0118478				0.091943
	0.0486265				0.102878
	0.0345273				0.0176261
	0.153868				0.0890029
	0.157616				0.00567333
	0.0256184				0.0220219
	0.187443				0.102483
	0.204501				0.155127
	0.136252				0.0740363
	0.0269328				0.0457496
	0.00844628				0.0752097
	0.00934545				0.135969
	0.176595				0.0502206
	5.96754	1.67726
	0.0406939				0.0442966
	0.179838				0.131899
	0.0301144				0.100883
	0.271488				0.0713701
	0.101314				0.152474
	0.111401				0.16198
	0.0288729				0.16483
	0.196388				0.0117967
	0.0472707				0.0617689
	0.00331827				0.0377567
	4.5606	4.20369
	0.0217409				0.208831
	0.0368093				0.0605493
	0.127601				0.102414
	0.101626				0.0767195
	0.174431				0.0413257
	0.133021				0.129808
	0.00410067				0.0908405
	0.0747632				0.0353981
	0.121411				0.0740326
	0.128313				0.0454595
	5.96323	7.63511
	0.235143				0.0824023
	0.0593136				0.114914
	0.0374182				0.0888287
	0.107083				0.0765216
	0.0814934				0.145341
	0.0187869				0.0342736
	0.11787				0.0181152
	0.0143028				0.147296
	0.115203				0.0910597
	0.104078				0.116364
	4.24622			0.153885
	0.0856493				0.19709
	0.00436398				0.0087615
	0.17784				0.00777648
	0.00905032				0.000910195
	0.0305448				0.0345485
	0.0547904				0.0502149
	0.0356969				0.196232
	0.160958				0.0972327
	0.12066				0.1055
	0.0335035				0.217499
	1.10989	3.63285
	5.60242			0.47998
	0.191324				0.101012
	0.0677946				0.10575
	0.267473				0.00312626
	0.0108234				0.0351447
	0.214862				0.0716396
	0.0216495				0.120163
	0.0563763				0.0997564
	0.00989094				0.149542
	0.153949				0.0391985
	0.0426165				0.130324
	2.45753	2.70262
	0.0135044				0.11895
	0.0337249				0.126524
	0.0180804				0.0103828
	0.106899				0.0496407
	0.0419494				0.0970041
	0.136735				0.0417512
	0.0647113				0.135547
	0.165592				0.104155
	0.04221				0.148519
	0.333262				0.150843
	7.87662	1.29934
	0.102618				0.0741592
	0.0335826				0.132912
	0.130623				0.0617199
	0.00394844				0.0228579
	0.144818				0.0658326
	0.107917				0.0770318
	0.0815488				0.0375384
	0.0524155				0.0595519
	0.0365266				0.0587324
	0.0531698				0.0810959
	2.65352	2.58301
	0.167161				0.0603828
	0.242705				0.0319586
	0.00796256				0.0169946
	0.117204				0.0635534
	0.016521				0.0334936
	0.056835				0.0347864
	0.00834989				0.0915171
	0.00402663				0.0677433
	0.0251373				0.0445858
	0.0347637				0.041123
	4.68118	2.47155
	0.0266992				0.0637943
	0.156851				0.108282
	0.0527903				0.112198
	0.0102365				0.0149023
	0.0189274				0.0180512
	0.0618266				0.0561161
	0.121466				0.0903412
	0.0596078				0.000888156
	0.0326802				0.0801919
	0.179742				0.121463
	2.50104	4.24624
	0.0117327				0.0502116
	0.0754763				0.0688498
	0.177188				0.0168632
	0.0833608				0.130595
	0.0531194				0.0326258
	0.110984				0.0376581
	0.00641797				0.135439
	0.0978189				0.055636
	0.0763186				0.0920386
	0.077684				0.0552571
	3.35738	2.48182
	0.138153				0.13059
	0.0240237				0.0770616
	0.0955919				0.076648
	0.016106				0.0333622
	0.0353704				0.120017
	0.273666				0.133834
	0.0598686				0.00497834
	0.00992577				0.0108014
	0.0263799				0.086436
	0.1581				0.0534931
	3.04491	3.6999
	0.0196269				0.0171771
	0.035592				0.00920395
	0.0056808				0.0767497
	0.0463954				0.0138978
	0.0596505				0.0249307
	0.0275214				0.0913573
	0.000478933				0.0133165
	0.119748				0.121202
	0.0268286				0.0948291
	0.0515645				0.0936386
	3.11609	3.89734
	0.0266876				0.0423425
	0.0567451				0.0721359
	0.168834				0.014296
	0.0768498				0.02708
	0.082506				0.0228436
	0.0578946				0.111922
	0.065657				0.0571854
	0.0913421				0.00202394
	0.0129262				0.0325733
	0.135002				0.03797
	0.778972		2.55331
	0.13053				0.0108967
	0.0814546				0.0919853
	0.0203421				0.0566478
	0.000101541				0.0384593
	0.0319824				0.0409775
	0.159448				0.0749637
	0.0178684				0.0448397
	0.00187881				0.116271
	0.00132665				0.00608433
	0.0144982				0.110396
	1.01425	2.81535
	1.81222			0.123405
	0.0187762				0.0329023
	0.0412356				0.00880162
	0.158447				0.0449445
	0.000237497				0.135931
	0.0687401				0.0239679
	0.0160466				0.0918125
	0.0455237				0.0973313
	0.00596768				0.0541221
	0.104508				0.0624497
	0.0994961				0.0111244
	2.09855	3.47962
	0.0636568				0.0733027
	0.0460614				0.0796127
	0.0586253				0.0547508
	0.107599				0.0462831
	0.102205				0.00326857
	0.0613559				0.0138896
	0.00900236				0.0606051
	0.00461329				0.0604971
	0.106502				0.0261923
	0.032804				0.0590202
	1.5619	3.0755
	0.0571955				0.0537878
	0.00491904				0.0255772
	0.0790503				0.00181922
	0.0605657				0.099623
	0.0957971				0.0464725
	0.119555				0.0360545
	0.0809359				0.0154391
	0.0323987				0.110746
	0.0442911				0.0554423
	0.084832				0.0942073
	2.53698			0.732539
	0.074052				0.0644729
	0.00429541				0.0357535
	0.00795799				0.022311
	0.0266759				0.00928912
	0.0619359				0.00134851
	0.0109661				0.031513
	0.0683223				0.0173981
	0.096552				0.022336
	0.00293843				0.0711403
	0.0412937				0.0606433
	1.84411	2.45882
	0.0280192				0.0184244
	0.00722563				0.0282723
	0.0372307				0.0647922
	0.00232228				0.0484245
	0.00462526				0.0660105
	0.0109091				0.0707442
	0.0814307				0.0340474
	0.102559				0.00539715
	0.0189258				0.0485162
	0.00139341				0.00746711
	0.356095		1.64507
	0.0585113				0.020064
	0.0827893				0.0468751
	0.0501508				0.0493651
	0.0652718				0.00781518
	0.0382319				0.0021343
	0.0473617				0.0238655
	0.0275618				0.0016031
	0.0101664				0.0277264
	0.0521872				0.0397798
	0.0226349				0.0238936
	1.67855	1.97574
	0.0434722				0.0369601
	0.00977573				0.0255708
	0.029908				0.0215842
	0.0159663				0.0424137
	0.0499116				0.0499682
	0.0177274				0.0540557
	0.0358177				0.0582246
	0.0121337				0.0104854
	0.0276532				0.00488443
	0.0185283				0.0198975
	1.84445			0.751556
	0.0636662				0.00979581
	0.0493062				0.00990527
	0.00661323				0.00803612
	0.04945				0.00841262
	0.00821365				0.00172387
	0.0335066				0.0107931
	0.0252505				0.0289751
	0.00172573				0.0249244
	0.0399919				0.0124057
	0.0393605				0.0225085
	0.841735				0.616197
	0.00510027				0.014576
	0.0136362				0.0665126
	0.00425673				0.0109226
	0.0546319				0.0176742
	0.00491186				0.0197026
	0.0461294				0.0158167
	0.0113982				0.00946866
	0.0198226				0.00670132
	0.00317976				0.00613753
	0.0265143				0.0267246
	1.88848	2.03263
	0.00873449				0.0268986
[truncated: 135 more rows]
[truncated: 4 more columns]

## Sheet: Figure 5
Figure 5c	SAP				Tre+SAP				BC-FMT+SAP				Tre-FMT+SAP
	Edema	Inflammation	Necrosis	Bleeding	Edema	Inflammation	Necrosis	Bleeding	Edema	Inflammation	Necrosis	Bleeding	Edema	Inflammation	Necrosis	Bleeding
	1.8	1.1	0.1	0	2	1.5	0.3	0	2.8	2.1	0.3	0	2.2	2.3	0	0
	1.6	0.7	0.3	0.1	2.6	0.6	0.1	0.1	3.2	1.9	0.2	0	2.5	1.7	0.2	0.2
	2.2	0.8	0.2	0	2.5	0.9	0.1	0.1	2.1	2.3	0.4	0.2	3.1	1.4	0.1	0.1
	2.6	1.1	0	0	2.4	1.2	0.2	0.3	2.9	1.7	0.3	0.1	2.6	2.2	0.3	0.1
	2.2	1.9	0.2	0.2	3	1.3	0.3	0.4	2.4	2.9	0.3	0.4	2.7	1.6	0.1	0
	2.3	1	0.1	0.3	2.2	1.4	0.1	0	2.5	2.4	0.2	0	2.4	1.5	0.1	0.3
	3.2	1.4	0.3	0.1	2.3	1.8	0.4	0	2.9	2.5	0.1	0.2	3.3	2.1	0.2	0
	2.7	1.2	0.2	0.2	1.9	1.2	0	0	2.1	2.6	0.4	0.1	2.4	1.6	0.3	0.2
	2.8	2	0.4	0.2	2.4	1.9	0	0.1	2	1.8	0.5	0	2.1	2	0.3	0
	2.1	1.2	0.1	0.1	3.1	1.1	0.3	0.2	3	2.5	0.4	0	2.4	2.3	0.1	0.1
	2.1	0.7	0.1	0.3	2.1	1.5	0.2	0	2.6	2.2	0.3	0.1	1.8	2	0.4	0
	2.4	0.6	0	0	2.3	1.4	0	0	1.7	1.5	0.2	0	2.3	1.8	0.2	0
Figure 5d	Serum amylase levels
	SAP	Tre+SAP	BC-FMT+SAP	Tre-FMT+SAP
	2.123	2.345	2.81341	2.69173
	2.34	2.567	2.74527	1.80855
	2.243	2.234	3.34884	2.2569
	1.567	2.687	1.80747	2.69118
	2.34	2.256	2.54874	2.86351
	1.444	1.879	2.73119	2.11355
	1.345	1.3567	1.91644	2.06723
	1.789	2.7987	1.88417	2.24462
	1.987	1.0987	2.15082	2.51097
	2.097	2.134	2.61341	1.9939
	1.096	1.5674	2.44711	3.04705
	2.111	1.6574	2.68023	2.33918
Figure 5e, f	Name/(pg/ml)	SAP												Tre+SAP												BC-FMT+SAP												Tre-FMT+SAP
	G-CSF	239444	282503	248115	259858	233999	244890	270381	233887	154253	395879	80141	371491	250441	377059	82533	79667	78225	83229	375894	179753	212958	81448	158053	378225	325658	302568	295684	402156	385698	412568	365897	356894	365897	378137	303999	354890	356897	298687	284568	382978	395789	372641	335648	365789	289754	382533	379667	383229
	MCP-1	16107	11414	13000	14507	14349	17865	10354	12228	14968	17122	12345	4775	12302	12287.5	12052	14714	10269	20583	14306	13017.8	15968.9	17648.5	15545.1	10269	17338	26924	30603	39804	45940	27932	21378	28263	6967	39220	24349	15865	8093	23888	16889	13882	18122	26581	27475	35923	26242	12052	14714	20583
	RANTES	7934.5	8181.89	8504.6	8592.63	10398	5471	7960.64	8989.03	10672.5	9870	9861.67	4814	8804.54	9495	8729	11349	9507	6203	9631	9857.67	10563.9	8776	7732.52	9359	12097	14330	11174	13685	14564	12775	11035	10759	7893	17104	13725	12838	7364	12645	9508	12111	18532	9837	10767	14020	9575	8355	8832	10127
	KC	4281.5	7090.89	6768.37	7064.85	4725	3838	7461.49	7814.52	9035.25	7175	8848.67	5249	7576.98	8665	8355	8832	9359	10127	7823	8617.33	8855.78	9479.5	8984.2	9507	14817	15337	13155	14070	13386	13579	9825	8236	3574	8500	14898	7471	4286	13507	11617	10903	7308	10773	11762	14546	11338	8729	11349	12203
	Eotaxin	5861	4939.11	5072.43	5403.41	7801	3921	4544.24	4897.33	4598.5	9056	3678.33	2083	4853.96	7329	3911	3370	3754	3366	7904	4870	5380	3368	4539.33	6754	7581	8817	11812	11563	12532	9067	8338	12286	5258	6946	6801	5921	4194	8784	5834	6098	9305	10497	8706	10809	9501	6911	6370	5366
	IL-12P40	3688.5	4225.11	4239.31	4719.84	2965	4412	4637.88	4629.55	4594.75	5325	4149.33	3201	4317.52	6288	4745	4381	3322	4422	6254	3138	5271.33	4401.5	4936.94	2322	5308	8096	8840	13760	10440	10126	14228	9175	5225	2200	3965	3412	4075	6395	5623	5808	8086	6161	7755	10147	8545	8745	4381	8422
	IL-6	728	589.36	681.61	723.08	609	847	684.93	701.17	842.71	539.6	724.87	503.61	652.7	796.42	787	904	483.62	374	709.22	829.14	937.45	489	951.86	883.62	2000	2285	10651	18848	20108	11168	4136	3422	568.65	21289	9109	5747	336.68	1339	869.2	768.62	4087	3778	1218	10788	6421	1287	1904	3474
	IL-17A	627	309.63	430.06	423.23	700	554	400.72	405	451.89	304.52	499.38	124.99	345.19	345.12	787.6	428.22	282.32	689.1	407.91	520.31	539.11	558.66	539.36	282.32	406.91	557.71	1662	1795	2488	1149	475.85	2097	239.4	4960	1300	1554	113.47	548.53	264.06	321.82	451	697.45	666.82	852	1322	787.6	428.22	689.1
	MIP-1β	842.37	661.62	720.75	764.15	914	770.74	615.45	683.47	797.49	953.6	678.72	352.54	695.59	760.18	653.48	690.21	692.48	979.38	827.87	701.29	836.18	834.8	790.75	692.48	1172	1316	1436	1929	1904	1250	1071	1325	536.12	943	1114	570.74	595.8	1033	741.75	813.7	817.01	1304	1074	1618	1138	1653.48	1690.21	979.38
	IL-10	420.51	495.74	507.12	568.26	336.44	504.58	498.87	569.77	660.1	607.97	653.46	225.8	536.83	551.95	680.89	731.46	548.04	705.03	655.86	654.77	671.89	718.25	681.63	448.04	1156	523.68	678.26	707.23	983.74	867.39	796.2	584.97	675.28	4058	436.44	304.58	752.25	922.16	1055	1200	730.89	319.28	857.27	985.17	583.45	680.89	731.46	705.03
	IL-12P70	499.74	177.85	271.27	270.89	366.79	632.68	196.63	202.66	237.82	84.65	262.29	186.62	192.84	165.06	242	285.13	259.73	336.03	70.38	230.73	212.38	310.58	251.23	259.73	288.37	210.64	158.11	181.28	237.36	187.12	149.51	155.24	57.87	437.96	466.79	532.68	74.23	166.76	172.55	172.55	122.68	50.6	112.98	238.85	135.31	242	285.13	336.03
	TNF-α	257.23	239.89	255.87	247.88	265.68	248.77	249.88	274.72	288.26	177.77	354.1	187.81	251.98	279.62	280.11	391.67	390.51	102.14	268.72	317.13	229.33	246.91	264.46	290.51	261.18	273.76	311.77	311.77	395.03	292.72	202.14	229.93	139.04	157.28	285.68	318.77	101.82	211.36	205.21	223.73	211.36	144.91	192.96	273.76	192.96	80.11	91.67	102.14
	IL-1β	138.5	109.83	117.12	121.93	135.98	141.01	131.89	116.99	81.58	138.17	91.98	99.35	102.77	172.32	153.13	61.2	61.62	108.06	95.45	128.88	110.8	84.63	108.1	249.18	154.18	195.85	124.79	250.9	252.63	150.49	97.27	196.04	36.76	117	230.38	110.04	47.33	121.87	96.36	116.39	62.59	120.04	168.25	204.5	138.72	109.1	57.83	124.25
	IFN-γ	170.21	73.22	104.97	115.24	130.38	210.04	104.49	90.61	84.62	86.43	72.04	61.2	76.07	171.59	109.1	57.83	49.18	124.25	107.2	112.84	114.76	91.04	106.21	235.98	105.49	129.37	188.57	343.03	425.23	211.42	167.48	253.92	35.21	153.13	61.62	108.06	36.06	82.16	73.04	85.58	119.71	97.53	120.56	221.16	258.82	423.43	23.38	241.01
	IL-13	102.03	54.3	70.21	68.03	142.49	61.57	61.25	58.54	74.92	83.89	38.58	40.42	59.45	104.71	40.42	42.3	33.03	47.98	176.38	62.48	95.61	45.14	67.74	33.03	124.84	124.84	166.08	207.18	202.06	166.08	129.99	124.84	63.83	126.36	112.49	91.57	158.9	99.17	94.06	88.97	119.7	188.97	88.97	181.52	135.15	40.42	42.3	47.98
	GM-CSF	72.4	65.1	64.95	69.21	78.27	66.52	56.76	61.53	61.25	100.01	48.4	46.9	64.14	66.29	49.73	55.21	40.25	57.2	92.33	57.08	68.87	56.21	60.72	40.25	130.28	124.41	153.66	158.85	165.81	142.94	124.41	112.18	73.07	85.06	88.27	86.52	81.58	115.3	100.84	94.06	115.3	116.85	105.78	147.69	116.85	49.73	55.21	57.2
	IL-1α	82.56	40.8	54.21	54.56	84.03	81.09	45.99	44.84	55.31	45.58	51.85	24.96	44.42	61.07	53.53	32.49	69.52	66.63	52.61	49.03	56.09	49.56	51.56	69.52	68.05	77.43	57.58	63.76	74.4	61.42	44.57	53.73	33.86	251.01	124.03	61.09	37.58	64	51.98	92.61	38.35	55.72	58.7	65.36	51.86	53.53	32.49	66.63
	MIP-1α	57.99	22.23	32.7	30.75	64.47	51.51	24.09	24.74	30.08	23.35	26.33	17.02	24.19	28.25	26.89	27.15	24.94	36.65	31.56	27.43	31.88	31.9	30.4	24.94	38.11	43.47	40.6	33.23	47.4	36.67	29	36	34.62	42.3	54.47	31.51	14.82	45.08	23.97	24.64	28.11	39.55	30.78	46.68	33.45	36.89	27.15	36.65
	IL-9	52.64	25.53	32.76	31.03	58.96	46.32	24.8	26.66	28.74	28.62	27.59	20.37	26.33	26.7	25.79	31.2	25.79	30.37	27.61	27.9	28.63	30.79	29.1	25.79	50.74	44.72	41.7	43.71	49.73	65.66	45.72	45.22	23.11	34.52	18.96	26.32	22.11	34.15	40.7	35.16	37.68	21.61	35.66	38.18	38.18	50.79	31.2	30.37
	IL-5	38.52	30.63	35.46	34.16	38.82	38.22	33.58	36.04	45.1	17.88	44.7	29.32	34.25	41.44	29.32	35.4	49.38	42.1	33.5	42.05	39.22	48.75	33.34	49.38	33.92	21.66	44.9	43.84	54.14	27.58	39.84	29.27	12.88	97.37	48.82	48.22	24.62	26.31	47.42	17.04	47	40.68	13.29	32.23	28.43	29.32	55.4	42.1
	IL-2	7.74	6.17	6.68	7.93	5.49	9.99	6.69	6.62	6.15	10.2	4.62	3.69	6.17	11.34	5.56	4.8	3.51	7.12	9.16	7.23	7.84	5.96	7.01	13.51	14.73	13.65	22.32	23.42	22.87	17.97	15.8	14.73	8.9	18.04	7.49	8.99	7.87	13.12	13.92	11.52	15.8	11.52	11.26	20.14	15.26	15.56	14.18	17.12
	IL-3	11.18	6.92	8.48	8.55	12.1	10.25	8.43	8.28	8.05	7.71	8.04	5	7.2	12.17	9.37	8.5	6.25	9.37	8.08	10.01	9.15	8.94	9.37	16.25	11.5	12.8	19.38	22.59	23.4	17.39	12.28	14.62	6.97	25.78	16.1	16.25	16.73	12.28	9.72	10.1	12.41	11.12	10.99	18.05	16.2	19.37	8.5	9.37
	IL-4	2.13	2.49	2.41	2.47	2.18	2.07	2.39	2.48	2.67	2.74	2.39	2.33	2.53	2.35	2.33	2.7	2.15	3.28	2.55	2.46	2.76	2.99	2.74	2.15	5.11	3.89	3.99	4.9	5.53	4.49	3.4	3.3	2.02	4.89	3.18	3.07	2.11	3.69	3.3	3.69	3.69	2.74	4.74	4.39	3.49	2.33	2.7	3.28
Figure 5g	TG				TC				HDL-C				LDL-C
	SAP	Tre+SAP	BC-FMT-SAP	Tre-FMT+SAP	SAP	Tre+SAP	BC-FMT-SAP	Tre-FMT+SAP	SAP	Tre+SAP	BC-FMT-SAP	Tre-FMT+SAP	SAP	Tre+SAP	BC-FMT-SAP	Tre-FMT+SAP
	1.02	1.1	1.6925	1.11	2.37	2.42	3.2	2.545	0.71	1.02	1.555	1.145	0.38	0.46	0.48	0.575
	0.56	1.51	1.935	1.795	3.12	2.91	2.34	3.165	1.56	0.85	0.645	1.23	0.53	0.51	0.705	0.705
	0.877	1.3225	2.2325	1.9225	2.89	2.021	2.375	3.105	0.558	1.056	1.615	1.335	0.568	0.358	0.545	0.59
	1.5	2.3	1.975	2.16	3.07	1.82	1.805	2.665	0.91	1.12	1.13	1.495	0.68	0.6	0.64	0.79
	1.36	1.81	1.24	1.92	2.02	2.31	3.09	2.055	0.76	0.75	1.41	0.545	0.47	0.81	0.825	0.76
	1.077	0.9225	2.4025	2.395	1.89	2.341	2.97	2.855	0.938	1.056	1.105	1.635	0.848	0.258	0.645	0.6
	2.02	1.2	1.485	1.48	3.17	2.65	1.54	2.94	0.61	1.34	0.68	0.635	0.68	0.36	0.395	0.76
	1.86	1.51	1.2275	1.7925	2.62	1.94	2.9	2.95	1.26	0.55	0.645	1.305	0.83	0.97	0.815	0.675
	1.777	1.0225	2.6925	0.89	1.69	3.021	2.19	1.375	1.358	0.56	1.41	1.135	0.731	0.468	1.075	0.515
	1.4	2	1.7175	1.19	2.37	3.35	2.115	3.095	1.31	0.94	1.22	1.13	0.93	0.71	0.875	0.76
	1.36	1.31	1.81	1.35	1.92	2.57	2.95	3.02	0.86	0.81	0.94	1.06	0.43	0.51	0.29	0.28
	1.977	1.4225	2.11	1.74	2.19	3.061	2.69	1.87	1.438	1.6	0.96	1.12	0.998	0.588	0.66	0.32

## Sheet: Figure 6
Figure 6a	PCoA analysis
	sample	V1	V2	V3	Groups
	FTSAP1	-0.218203	0.0440054	-0.0222458	BC-FMT+SAP
	FTSAP2	-0.139257	-0.067835	-0.016143
	FTSAP3	0.0965345	-0.0880205	0.013331
	FTSAP4	0.00637337	0.0562731	0.000756545
	FTSAP5	0.0542518	0.0500429	-0.00100375
	FTSAP6	-0.0291916	-0.0646541	-0.0717492
	FTSAP7	0.157571	-0.0528398	-0.0280815
	FTSAP8	0.0945838	-0.0293483	-0.0155215
	FTSAP9	-0.213332	0.0354332	-0.00711631
	FTSAP10	-0.257272	0.045272	0.087181
	FTSAP11	-0.0454742	-0.0487666	0.00839246
	FTSAP12	-0.149213	-0.117303	0.0213303
	TreFTSAP1	0.143882	0.0831612	0.0578378	Tre-FMT+SAP
	TreFTSAP2	0.058044	0.0179339	-0.00419121
	TreFTSAP3	0.0786904	-0.0701897	0.0935741
	TreFTSAP4	0.151427	0.0309419	0.00462882
	TreFTSAP5	-0.14195	0.0355286	0.03529
	TreFTSAP6	0.184981	0.051211	-0.016808
	TreFTSAP7	-0.0379866	0.0591968	-0.0470199
	TreFTSAP8	0.0343321	-0.0510737	-0.022409
	TreFTSAP9	-0.00605297	0.0109203	-0.0915612
	TreFTSAP10	0.144037	0.0563931	0.00300762
	TreFTSAP11	-0.0925756	0.0370893	-0.0346934
	TreFTSAP12	0.125799	-0.023372	0.0532139
Figure 6b	Microbial distribution of the top 10 abundance after FMT in GF mice
	Phylum	BC-FMT+SAP	Tre-FMT+SAP	Family	BC-FMT+SAP	Tre-FMT+SAP
	p__Bacteroidota	40.8228	49.736	f__Muribaculaceae	32.152	39.6242
	p__Verrucomicrobiota	28.6234	24.7887	f__Akkermansiaceae	28.6216	24.7884
	p__Firmicutes	20.5584	15.3377	f__Lactobacillaceae	5.62762	1.71999
	p__Desulfobacterota	3.2674	3.08612	f__Rikenellaceae	4.72346	4.60192
	p__Proteobacteria	2.86317	2.85983	f__Lachnospiraceae	4.68144	4.37165
	p__Deferribacterota	1.98905	2.49695	f__Desulfovibrionaceae	2.77567	2.48902
	p__Actinobacteriota	1.60094	1.35822	f__Erysipelotrichaceae	2.45488	2.19438
	p__Cyanobacteria	0.0584351	0.00200808	f__Deferribacteraceae	1.98905	2.49695
	p__Campilobacterota	0.0507542	0.0117975	f__Enterobacteriaceae	1.84342	1.47024
	p__Acidobacteriota	0.0453324	0.213911	f__Eubacterium_coprostanoligenes_group	1.83408	1.29938
	Others	0.120334	0.108788	Others	13.2969	14.9439
Figure 6c	LEFSe analysis
	Microbial names	Logarithm value	Groups	LDA value	p value	Note
	p__Bacteroidota	5.69668	Tre-FMT+SAP	4.56462	0.0282404	Top10
	p__Acidobacteriota	3.33025	Tre-FMT+SAP	3.92112	0.0319093	Top10
	p__Synergistota	2.8863	Tre-FMT+SAP	3.85852	0.0468854
	p__Firmicutes	5.31301	BC-FMT+SAP	4.32086	0.0110744	Top10
	f__Lactobacillaceae	4.7538	BC-FMT+SAP	4.2943	0.000174887	Top10
	f__Muribaculaceae	5.60127	Tre-FMT+SAP	4.56324	0.00558362	Top10
Figure 6d	PCA analysis
	id	PC1(26.6%)	PC2(14.7%)	Groups
	BC-FMT1	-17.5929	-1.3065	BC-FMT+SAP
	BC-FMT2	11.5618	-5.00744
	BC-FMT3	-7.7761	-7.06584
	BC-FMT4	-18.138	-4.01374
	BC-FMT5	-0.85227	20.3382
	BC-FMT6	23.2132	-2.84291
	BC-FMT7	22.7234	-24.3666
	BC-FMT8	-19.3397	-6.33264
	BC-FMT9	-10.2545	6.35165
	BC-FMT10	24.3746	31.4638
	BC-FMT11	29.9282	39.6888
	BC-FMT12	18.2182	24.3317
	Tre-FMT1	12.7931	-3.95248	Tre-FMT+SAP
	Tre-FMT2	-1.86559	-19.9864
	Tre-FMT3	52.1415	-21.3215
	Tre-FMT4	-8.61565	-9.31392
	Tre-FMT5	-20.8449	-12.6115
	Tre-FMT6	7.78237	-11.5434
	Tre-FMT7	-39.4036	7.79229
	Tre-FMT8	-20.8088	7.49039
	Tre-FMT9	-9.05232	-9.43967
	Tre-FMT10	-36.715	13.7479
	Tre-FMT11	11.4912	-13.3584
	Tre-FMT12	-2.96802	1.25808
Figure 6e	OLPS-DA in Tre-FMT+SAP vs. BC-FMT+SAP
	sample	t1(15%)	to1	Groups
	BC-FMT1	-116440	215091	BC-FMT+SAP
	BC-FMT2	-82649.8	-86391.5
	BC-FMT3	-22744.6	276977
	BC-FMT4	-69503.6	346712
	BC-FMT5	-341995	-117380
	BC-FMT6	30597.5	-283015
	BC-FMT7	93367.8	-252912
	BC-FMT8	-170282	352197
	BC-FMT9	-36716.4	78830.5
	BC-FMT10	-394496	-108033
	BC-FMT11	-413191	-140820
	BC-FMT12	-184607	-281254
	Tre-FMT1	49608.8	-199140	Tre-FMT+SAP
	Tre-FMT2	212422	-4015.69
	Tre-FMT3	72862.9	-497290
	Tre-FMT4	308922	47127.8
	Tre-FMT5	144460	236210
	Tre-FMT6	264004	-192635
	Tre-FMT7	30940.3	369558
	Tre-FMT8	39444.6	158362
	Tre-FMT9	309578	-36040.1
	Tre-FMT10	95273.4	306699
	Tre-FMT11	230454	-162067
	Tre-FMT12	-49308.7	-26770
Figure 6f	ChemRICH for FMT in Tre-FMT+SAP vs. BC-FMT+SAP group
	Cluster name	Cluster size	p-values	Altered metabolites	Increased	Decreased	Increased proportion (%)
	Glycerophospholipids	18	2e-08	2	2	0	100
	Carboxylic acids and derivatives	20	3.9e-07	3	3	0	100
	Organooxygen compounds	7	4.5e-05	3	3	0	100
	Fatty Acyls	34	0.00095	2	1	1	50
	Imidazopyrimidines	4	0.13	2	2	0	100
	Benzene and substituted derivatives	8	1	1	1	0	100
	Hydroxy acids and derivatives	4	1	0	0	0	-
	Indoles and derivatives	4	1	0	0	0	-
	Phenols	3	1	0	0	0	-
	Pyridines and derivatives	4	1	1	1	0	100
	Steroids and steroid derivatives	13	1	0	0	0	-
Figure 6g	BC-FMT+SAP vs. Tre-FMT+SAP
	VIP	-log10(pvalue)
	x	y1	y2	y3
	15.5535	1.08548
	12.9264			1.90254
	11.424	1.00294
	10.4767	0.60417
	9.31546			1.39349
	8.9664	0.618743
	7.77627	0.777266
	7.33672	1.21868
	7.13329	0.701963
	6.83519	1.12074
	6.58682	0.728685
	6.44804	0.837107
	5.51075	0.450757
	5.40053	0.842131
	5.26857	1.21686
	5.23591	1.2319
	4.88004	0.523351
	4.7168			1.95345
	4.25414	0.573778
	3.98431	0.0084354
	3.81602	0.806987
	3.71996	0.883684
	3.31399	1.06439
	3.28746	0.0948605
	3.15383	0.51862
	3.07217	0.585453
	3.05798	0.213291
	2.9274	0.449995
	2.82918	0.450844
	2.7396			1.32154
	2.71804	0.623208
	2.69723	0.79954
	2.63151	0.796059
	2.53659	0.31802
	2.44535	0.792049
	2.38336	0.173817
	2.38051	0.62611
	2.36128	0.274835
	2.35489	0.323777
	2.35025	1.04903
	2.32366	1.01519
	2.31116	1.16156
	2.29422	0.751088
	2.27801	1.02624
	2.26033	0.463451
	2.24123	0.574678
	2.19101	0.788932
	2.14968			1.46839
	2.12161	0.896768
	2.1186	0.760855
	2.0545	1.17267
	2.05072	0.402209
	2.0097	0.71198
	1.98537	1.05879
	1.93857	0.285295
	1.93655	0.667377
	1.92686	1.13838
	1.90068	1.03886
	1.89819			1.34408
	1.88716	0.628219
	1.88367	1.03873
	1.83048	1.2294
	1.80078	0.870888
	1.76202	1.08113
	1.75358			1.71497
	1.75067	0.0265065
	1.73935			1.83576
	1.73656	0.622175
	1.72918	1.15776
	1.72223	0.738784
	1.71075	0.118531
	1.69031	0.46752
	1.68774	0.937211
	1.68081	0.952091
	1.66758			1.301
	1.63481	0.668239
	1.61098			1.81963
	1.58112	0.678757
	1.56204	0.0106867
	1.54173			1.46821
	1.51712	0.842338
	1.48812	1.16924
	1.48766	0.92699
	1.47913	0.167856
	1.43871	0.364389
	1.42788	0.322085
	1.42108	0.559511
	1.41265	0.387148
	1.41089	0.6037
	1.39244	0.798136
	1.38544			1.96209
	1.34014	0.621521
	1.33448	0.0891798
	1.31567	0.826943
	1.29985	0.85441
	1.29981	1.24114
	1.29572	0.157111
	1.29343	0.0132553
	1.27539			1.60692
	1.23475	0.704609
	1.22047	0.942308
	1.21988	0.524865
	1.21851			1.61942
	1.20313	0.343377
	1.19724	0.343079
	1.1945	0.641934
	1.18742	0.062505
	1.17938	0.921339
	1.16226	0.977066
	1.16151	0.858093
	1.15922	0.730207
	1.14646	0.171987
	1.14142			1.82039
	1.13607	1.02968
	1.12515			1.30006
	1.11958	0.287884
	1.11923	0.204358
	1.11614	0.19626
	1.10483	0.826287
	1.10389	0.292394
	1.09706			1.43881
	1.09004	0.611634
	1.07748			1.47902
	1.06912			1.30975
	1.06779	0.595596
	1.06259	1.02437
	1.05156	0.0420099
	1.04223	1.01363
	1.03899	0.242919
	1.03295	0.679331
	1.01027	0.371701
	1.00993	1.21613
	0.999691	1.22448
	0.996796	0.466797
	0.993792		1.23977
	0.992913		0.881314
	0.992652		1.00455
	0.985506		0.24975
	0.98388		2.50887
	0.978557		1.1111
	0.967763		0.860206
	0.956844		1.00299
	0.943529		0.544026
	0.937777		0.838425
	0.930375		0.788517
	0.921572		0.0940672
	0.919808		0.7732
	0.917786		1.17506
	0.907369		0.284339
	0.89898		0.437709
	0.892204		0.0196974
	0.885556		0.896332
	0.88508		0.695116
	0.881659		0.426279
	0.878682		1.20091
	0.876191		0.825032
	0.848526		0.979846
	0.847955		2.12133
	0.838736		0.423931
	0.836675		0.750097
	0.836364		0.673098
	0.831518		0.782536
	0.829713		1.35387
	0.82299		0.591922
	0.821452		0.379681
	0.814028		0.272116
	0.802748		1.10505
	0.796621		0.0309063
	0.791742		0.297069
	0.790804		0.498552
	0.790028		1.06814
	0.786682		0.20987
	0.78167		0.0980394
	0.772375		0.828657
	0.769468		0.684253
	0.768607		1.52982
	0.763302		0.286961
	0.761344		1.33753
	0.76112		0.593907
	0.754596		0.817926
	0.752346		1.46666
	0.750635		0.844858
	0.747945		0.870378
	0.747855		0.229482
	0.740675		1.23713
	0.737264		0.454854
	0.729469		1.1622
	0.723174		1.26992
	0.722291		0.25839
	0.72195		0.453001
	0.716597		1.07934
	0.714139		0.463454
	0.711914		1.07446
	0.71092		1.25361
	0.710622		0.353893
	0.698075		0.640373
	0.695075		0.772133
	0.680495		0.473963
	0.67712		0.88303
	0.672823		0.773006
	0.671558		0.644886
	0.671087		1.20013
	0.670361		0.627015
	0.666006		2.08339
	0.661221		0.582472
	0.661189		0.561462
	0.659174		1.43014
	0.658732		0.594707
	0.658707		1.04793
	0.657421		0.994901
	0.655234		0.00443641
	0.651015		0.0817884
	0.65098		0.659652
	0.650126		0.0385253
	0.647582		0.828537
	0.646634		0.456923
	0.64295		0.372146
	0.641642		0.701365
	0.64003		0.706296
	0.639071		0.774436
	0.636707		1.00154
	0.635387		0.451242
	0.633113		0.853006
	0.631796		0.787328
	0.630978		1.62481
	0.62963		0.419772
	0.622561		0.845077
	0.622407		0.211182
	0.622361		0.129159
	0.621905		0.435174
	0.621841		0.0748945
	0.620082		0.603695
	0.619932		0.277342
	0.619798		0.450003
	0.617973		0.535466
	0.617685		0.706503
	0.605538		1.20599
	0.605477		0.572148
	0.603162		0.255152
	0.600153		1.30749
	0.594839		1.65694
	0.594273		0.202131
	0.594023		2.05043
	0.591407		1.1239
	0.591117		0.942255
	0.590845		1.07836
	0.590591		0.89328
	0.590257		0.796399
	0.589891		0.775289
	0.589641		1.09442
	0.583557		1.26364
	0.578972		0.374248
	0.577084		0.664933
	0.576632		0.76565
	0.575995		0.940241
	0.570475		2.12002
	0.566888		0.0354293
	0.566233		0.828709
	0.565492		1.27535
	0.56533		0.755358
	0.563673		1.82001
	0.562799		1.00552
	0.561184		0.402216
	0.557108		0.369952
	0.552339		0.237446
	0.550517		0.676523
	0.549897		1.16537
	0.549227		0.826961
	0.547061		1.0109
	0.546601		0.306295
	0.545925		0.764577
	0.538676		1.18325
	0.537071		0.874702
	0.534295		0.326827
	0.5342		0.448471
	0.530766		0.0754221
	0.524789		0.936805
	0.524416		0.452235
	0.524327		2.35646
	0.524306		0.464666
	0.521176		0.0346583
	0.521034		0.84877
	0.518704		0.340748
	0.518168		0.897646
	0.517516		0.254304
	0.516249		0.360385
	0.513958		0.218589
	0.513607		0.144638
	0.512743		0.000218954
	0.512365		0.0446891
	0.51184		1.00939
	0.510279		0.0120131
	0.506063		0.4662
	0.505465		0.239538
	0.504764		0.0486177
	0.504173		0.765081
	0.495789		0.00741803
	0.494643		0.677049
	0.494075		0.449949
	0.493045		0.333076
	0.491884		0.61683
	0.491126		0.717949
	0.489798		0.871272
	0.48965		0.839682
	0.489242		0.298198
	0.488818		0.488413
	0.486315		0.191251
	0.483172		0.892782
	0.482509		0.20236
	0.481774		0.911329
	0.48169		1.11211
	0.480562		1.16867
	0.478444		0.149023
	0.478031		0.995364
	0.476895		1.43859
	0.476826		0.797494
	0.476764		0.0414856
	0.475932		0.835329
	0.475652		0.997239
	0.474412		0.0190486
	0.473549		0.947652
	0.47205		1.49482
	0.471134		0.201824
	0.470016		0.334556
	0.469096		0.647038
	0.467947		0.604036
	0.467691		1.08823
	0.462966		0.956193
	0.462466		0.166638
	0.458892		1.0024
	0.458443		0.653912
	0.455162		0.85887
	0.453624		0.195104
	0.451603		1.01308
	0.451555		0.881452
	0.450115		0.721538
	0.448158		0.685133
	0.444758		3.01883
	0.44296		1.10637
	0.440409		0.453864
	0.439879		0.673446
	0.439538		0.893023
	0.437552		0.570175
	0.433908		0.655653
	0.432741		1.17591
	0.430587		1.37387
	0.428087		1.09613
	0.427001		1.37991
	0.426749		0.356696
	0.424418		1.22785
	0.424158		0.53039
	0.421745		0.738332
	0.421334		0.15087
	0.419509		1.08705
	0.418683		1.96646
	0.418427		1.02666
	0.415451		0.251856
	0.415184		0.776285
	0.414568		0.434481
	0.414215		1.55469
	0.41417		0.0372542
	0.413915		0.70475
	0.413411		0.486523
	0.410647		1.02605
	0.410452		0.046122
	0.41021		0.788676
	0.409244		0.168809
	0.409022		0.434104
	0.408523		0.550063
	0.406941		0.120044
	0.405514		1.08073
	0.405297		0.576101
	0.402067		0.390823
	0.40194		0.245185
	0.398222		0.467655
	0.397818		0.41658
	0.397567		0.552813
	0.397172		0.654077
	0.396235		0.242956
	0.395691		0.166515
	0.395529		0.184931
	0.395519		0.115068
	0.395432		0.837473
	0.395285		1.58341
	0.394		0.65205
	0.392343		0.0722534
	0.392053		0.0667756
	0.391944		0.010065
	0.391045		0.277497
	0.391034		0.149084
	0.390981		0.818001
	0.39092		0.552973
	0.385648		0.726792
	0.385576		0.0658873
	0.384514		0.681444
	0.380837		0.186822
	0.380339		0.617444
	0.380334		0.111857
	0.376812		1.0069
	0.376385		0.135516
	0.374651		0.0189113
	0.374208		1.35105
	0.373754		0.581756
	0.372562		0.288445
	0.372484		0.322551
	0.372446		0.954094
	0.372435		1.38617
	0.372327		0.127235
	0.371524		0.25256
	0.371419		1.05562
	0.371252		0.449058
	0.370926		0.00805288
	0.369035		0.4673
	0.363482		0.566961
	0.361652		1.04856
	0.361285		1.66596
	0.36062		0.240911
	0.360282		1.24305
	0.359938		0.654455
	0.35553		0.474454
	0.353711		1.36566
	0.3531		0.140169
	0.352335		0.66312
	0.350495		0.159779
	0.350337		0.766206
	0.349858		0.963101
	0.349621		0.274569
	0.349387		0.583627
	0.349042		0.232795
	0.348992		0.518843
	0.346428		0.547772
	0.346231		0.244199
	0.346203		0.224095
	0.346195		0.727769
	0.345488		1.31752
	0.344921		1.00482
	0.344883		0.295542
	0.344831		0.982243
	0.344688		0.604404
	0.344088		0.667505
	0.341881		0.584943
	0.340149		0.120252
	0.338753		0.357545
	0.338126		0.152104
	0.337884		0.918451
	0.337687		0.217932
	0.336903		0.259946
	0.335924		0.655526
	0.335711		0.67199
	0.334961		0.292624
	0.333077		0.286078
	0.332842		0.830281
	0.330773		0.874884
	0.330667		0.58889
	0.330399		0.974829
	0.328761		0.634834
	0.328125		0.6948
	0.325508		0.642501
	0.324353		1.3544
	0.322308		0.175134
	0.321745		1.05636
	0.32157		0.350767
	0.319949		0.708462
	0.319202		1.6446
	0.318562		0.772232
	0.318053		0.514649
	0.317616		0.897757
	0.316338		0.308578
	0.314707		0.0972211
	0.314637		0.0263482
	0.314353		0.358463
	0.313885		0.0799426
	0.313255		0.821913
	0.312979		1.80077
	0.312925		0.0139881
	0.312593		0.710877
	0.311683		1.81385
	0.311598		1.99274
	0.310837		1.55188
	0.310274		0.761613
	0.309274		1.68947
	0.309264		0.197568
	0.307887		0.896447
	0.307453		0.643993
	0.304786		0.714649
	0.303933		1.00928
	0.302675		0.0600364
	0.302059		1.3724
	0.30169		0.209376
	0.300926		0.855901
	0.298646		0.0406138
	0.298392		0.788505
	0.297862		0.0075143
	0.29771		0.658218
	0.296817		0.74787
	0.296359		0.428886
	0.296029		1.0835
	0.295731		0.177225
	0.294373		0.0706795
	0.292816		0.256368
	0.292644		0.31559
	0.291605		0.188459
	0.289327		0.177903
	0.288971		0.843668
	0.285489		1.20596
	0.284633		0.697904
	0.284498		0.0664836
	0.283967		0.523438
	0.282584		0.319007
	0.282336		0.216879
	0.281825		0.131621
	0.280759		2.01477
	0.280757		0.791576
	0.280365		0.41447
	0.279389		0.0816561
	0.279375		0.188803
	0.279213		0.00436603
	0.278588		0.954889
	0.278297		0.41913
	0.278122		0.574653
	0.277848		1.18612
	0.276391		0.426185
	0.275861		2.12756
	0.275272		0.198969
	0.273748		0.324865
	0.272393		0.833106
	0.271127		0.508812
	0.270947		0.218678
	0.270755		0.592134
	0.270251		0.260811
	0.269828		0.663962
	0.269822		0.659489
	0.269779		1.24165
	0.269243		0.2166
	0.268064		0.353943
	0.267972		0.351894
	0.267869		0.768488
	0.267861		0.743685
	0.267294		1.15703
	0.267175		0.714855
	0.26713		0.73676
	0.266683		0.592727
	0.266553		0.408982
	0.266009		0.00691028
	0.265673		0.874058
	0.26562		0.259212
	0.264969		0.554209
	0.264257		0.893831
	0.263701		0.463743
	0.262972		0.982851
	0.261344		0.512216
	0.260845		0.364223
	0.260636		1.07784
	0.258257		0.150266
	0.258069		0.936142
	0.257587		0.420345
	0.2575		0.162817
	0.256127		0.728931
	0.255705		0.714337
	0.255609		0.556838
	0.254709		0.123961
	0.25456		0.295556
	0.254347		0.564406
	0.25412		0.492173
	0.253773		0.0171758
	0.253454		0.556641
	0.252625		0.660128
	0.252413		0.248111
	0.251973		0.00685217
	0.251267		1.41842
	0.251152		0.158627
	0.250887		1.00369
	0.250766		0.620255
	0.249974		0.490712
	0.249929		0.227303
	0.249211		0.621604
	0.24757		0.0959649
	0.247293		0.72063
	0.247117		0.57367
	0.246382		0.687284
	0.24565		0.613455
	0.244627		0.869049
	0.243328		1.1288
	0.242387		0.0450543
	0.241914		0.696112
	0.241781		0.327471
	0.241704		0.841588
	0.241531		0.689685
	0.241154		1.09819
	0.240888		1.09534
	0.240418		0.40509
	0.240193		0.409573
	0.23929		0.565897
	0.239133		0.283655
	0.238604		0.905597
	0.23838		3.13813
	0.237717		0.526613
	0.237009		0.534957
	0.236963		0.226105
	0.236888		0.0965471
	0.236467		0.731784
	0.235752		0.0266325
	0.235667		0.330666
	0.235495		0.840554
	0.234883		0.0875616
	0.234053		0.939194
	0.233739		0.370723
	0.232719		1.27701
	0.231897		0.513006
	0.231103		0.368984
	0.230985		0.696907
	0.230423		0.972848
	0.230108		0.503211
	0.229632		0.48215
	0.228796		0.0860408
	0.227601		0.463213
	0.226694		0.161379
	0.22664		1.53226
	0.226352		0.837184
	0.226023		2.0696
	0.225959		0.228642
	0.225653		0.300552
	0.225447		1.03193
	0.22541		0.140846
	0.224127		0.512684
	0.223387		0.273164
	0.223302		0.736917
	0.223087		0.279843
	0.221989		0.495677
	0.221986		0.491339
	0.221889		0.264587
	0.221374		0.740539
	0.220995		1.12296
	0.220815		0.781203
	0.220568		0.0413353
	0.219278		0.921951
	0.218728		0.473834
	0.218714		0.720638
	0.218529		0.540783
	0.218428		0.0110854
	0.218206		0.408923
	0.21802		0.402539
	0.21786		0.4622
	0.217751		0.742614
	0.217547		0.122223
	0.217201		0.735677
	0.217074		0.0305645
	0.217072		0.575037
	0.216531		0.260582
	0.215534		0.648865
	0.215403		0.867487
	0.215363		1.15003
	0.215023		1.0645
	0.214819		0.546902
	0.214261		1.10556
	0.212645		0.515761
	0.212208		1.69196
	0.211858		0.520409
	0.211282		0.468654
	0.21025		0.728837
	0.209831		0.344715
	0.209271		1.11959
	0.209159		1.03758
	0.209139		0.858978
	0.208916		0.676212
	0.208886		0.326935
	0.207301		0.610014
	0.206949		0.930114
	0.206565		0.500591
	0.205122		0.189233
	0.204741		0.300585
	0.204243		1.04724
	0.204036		0.36929
	0.203918		0.304293
	0.203641		0.325896
	0.20347		0.533219
	0.203279		1.74892
	0.202709		0.362509
	0.20217		0.698657
	0.201831		0.135336
	0.20172		0.502169
	0.201465		0.882035
	0.201382		1.00319
	0.201046		0.194923
	0.200709		1.37672
	0.20067		0.103418
	0.200133		0.34918
	0.199473		0.00674497
	0.199414		0.857591
	0.199374		1.35282
	0.198649		0.195048
	0.198247		0.532048
	0.198126		0.603589
	0.198054		0.270703
	0.197647		1.27032
	0.196491		0.0915989
	0.196242		0.289078
	0.196057		0.486093
	0.196023		0.311451
	0.195658		0.33694
	0.195364		0.553663
	0.195273		0.992241
	0.195171		0.792305
	0.194716		0.0592289
	0.193646		0.548703
	0.193625		0.0799015
	0.193384		0.591982
	0.193156		0.185271
	0.19281		1.21836
	0.192363		0.163653
	0.192205		0.0826754
	0.192143		1.16438
	0.191312		0.213642
	0.191036		0.537331
	0.190025		1.1696
	0.189758		0.146555
	0.189081		0.0952621
	0.188877		0.280468
	0.188094		0.0323828
	0.187759		1.11263
	0.187649		0.984577
	0.187351		0.143857
	0.187227		0.190838
	0.187194		0.669099
	0.187176		0.893487
	0.187081		0.899861
	0.186834		1.08561
	0.186684		0.791723
	0.186638		0.358218
	0.185723		0.160729
	0.185669		0.724127
	0.185314		0.540741
	0.185085		1.09129
	0.184837		0.280833
	0.184441		0.619567
	0.183899		0.360875
	0.183669		0.354618
	0.183514		0.408005
	0.182971		0.261887
	0.182912		0.681792
	0.181586		0.107656
	0.181458		3.18084
	0.181347		2.07082
	0.181049		1.94233
	0.18089		1.47025
	0.180621		0.834765
	0.180594		0.0400381
	0.180332		0.708621
	0.180207		0.640237
	0.179763		0.0302395
	0.1794		0.76642
	0.178749		0.170316
	0.178202		0.634641
	0.177752		0.32326
	0.176482		0.0964765
	0.176237		0.0278825
	0.176091		1.02331
	0.175748		0.168448
	0.175553		0.405511
	0.175095		0.397414
	0.174516		0.712426
	0.174053		0.812767
	0.173922		0.804569
	0.17366		0.776358
	0.172478		0.4397
	0.172113		0.696426
	0.171576		1.09604
	0.171208		0.781553
	0.171116		0.961908
	0.170506		0.271345
	0.170071		0.677001
	0.169903		0.068704
	0.169718		0.485752
	0.169407		1.8177
	0.169322		0.322064
	0.168696		0.184517
	0.168052		0.0403728
	0.167878		0.00436541
	0.167618		0.711995
	0.166804		0.70052
	0.166684		0.460409
	0.166659		1.5517
	0.166103		0.173346
	0.165943		0.372773
	0.165789		0.983181
	0.165311		0.729312
	0.165145		0.574311
	0.165142		0.261326
	0.164741		0.232671
	0.164701		1.4839
	0.164581		1.04208
	0.164309		0.329717
	0.16406		1.08362
	0.164014		1.7128
	0.163736		0.324152
	0.163357		0.065223
	0.162886		0.352962
	0.162879		0.42931
	0.162672		0.41589
	0.16232		0.438486
	0.162257		0.286416
	0.161753		0.796686
	0.161669		0.462716
	0.161589		0.127036
	0.161471		1.16783
	0.161403		0.15767
	0.16122		0.559222
	0.160982		0.00827621
	0.160766		1.22497
	0.160473		0.499564
	0.160437		0.25
	0.160297		0.0980754
	0.160178		0.10899
	0.160078		1.09634
	0.159776		0.144489
	0.159727		0.184567
	0.159627		0.398537
	0.159495		1.22248
	0.158919		0.0846962
	0.158906		0.379005
	0.158517		0.711322
	0.158422		0.482721
	0.158319		1.17395
	0.157888		0.487442
	0.157558		0.194465
	0.157436		0.516487
	0.157386		0.324065
	0.157358		0.512801
	0.156894		0.0466445
	0.156876		0.0916709
	0.15663		1.51395
	0.156548		0.393786
	0.156402		1.6162
	0.155979		0.0957794
	0.155914		0.180873
	0.155656		0.882026
	0.155575		0.584381
	0.15522		0.228795
	0.154459		0.106078
	0.153268		0.625768
	0.152704		0.113701
	0.152055		0.264764
	0.150737		0.62854
	0.150723		0.220356
	0.15049		0.100027
	0.149925		1.19237
	0.149894		0.324941
	0.149581		0.760221
	0.149425		0.400999
	0.149259		0.356217
	0.149199		0.963424
	0.149166		0.399319
	0.148805		0.884516
	0.148498		0.996361
	0.14848		0.745071
	0.148471		0.257848
	0.148376		0.137993
	0.148009		0.207146
	0.147949		0.453897
	0.147782		2.52657
	0.147675		0.287623
	0.14693		0.146125
	0.146151		0.0495356
	0.145727		0.118947
	0.144128		0.96177
	0.143509		0.703696
	0.143437		0.140687
	0.143112		0.333821
	0.143027		0.833661
	0.142517		1.38651
	0.142272		0.608521
	0.142201		0.398247
	0.142194		0.436667
	0.141602		0.565362
	0.141516		0.115917
	0.141307		0.939539
	0.141037		0.202691
	0.141007		0.205305
	0.140693		1.11965
	0.140093		0.518598
	0.140078		0.501478
	0.140006		0.419238
	0.139412		0.279544
	0.139279		0.128568
	0.138789		1.19259
	0.138698		0.0727155
	0.138206		0.321006
	0.138151		0.0014626
	0.138127		0.0159905
	0.137963		0.249312
	0.137764		0.45048
	0.13731		0.802454
	0.137102		0.53223
	0.136341		0.54739
	0.135812		0.0156058
	0.135637		0.97685
	0.135349		0.184564
	0.135241		0.453216
	0.135055		1.44904
	0.134574		0.0294125
	0.134528		0.139586
	0.134326		0.689591
	0.13388		1.07907
	0.13327		0.227664
	0.133163		0.626487
	0.132448		0.736773
	0.132086		0.4671
	0.131867		0.462905
	0.131729		0.414996
	0.13148		0.0551469
	0.131109		0.132196
	0.130892		0.129085
	0.130732		0.157445
	0.130671		0.331669
	0.130638		0.41045
	0.130252		0.676455
	0.130117		0.15075
	0.129752		0.342801
	0.129618		0.612188
	0.129576		0.489208
	0.12952		0.814375
	0.129381		0.863683
	0.129312		0.990869
	0.129282		0.920822
	0.129251		0.581743
	0.129236		0.435579
	0.128812		0.0569173
	0.128569		0.904446
	0.127586		0.222286
	0.127236		0.655632
	0.126945		0.0870054
	0.126723		0.0866249
	0.126302		0.0322495
	0.125903		0.00224275
	0.125726		0.382536
	0.125629		0.0198846
	0.125029		0.485293
	0.124665		0.0436295
	0.124358		0.260598
	0.124272		1.24812
	0.124215		1.18549
	0.124099		0.559853
	0.123785		0.623714
	0.123426		0.319604
	0.122961		0.744043
	0.122932		0.962689
	0.12263		0.368592
	0.122215		0.950341
	0.122211		0.248157
	0.122108		0.0554206
	0.122046		0.183306
	0.122017		0.498663
	0.121858		0.48806
	0.121597		0.725539
	0.120628		0.471609
	0.120395		0.193143
	0.120331		1.4584
	0.120158		1.31085
	0.120122		0.00550145
	0.119631		0.40291
	0.119532		0.253002
	0.119089		0.500135
	0.118698		0.324525
	0.118635		0.779984
	0.118474		0.746703
	0.118185		0.165098
	0.118099		1.54917
	0.11765		0.313333
	0.117295		0.391328
	0.11709		0.972059
	0.116295		0.201045
	0.11613		0.120838
	0.115146		0.0375579
	0.115141		0.73085
	0.114804		0.0207623
	0.114658		1.31588
	0.114366		0.0239486
	0.114284		1.73953
	0.114196		0.397282
	0.114079		0.0611658
	0.114019		0.356487
	0.113883		0.0903154
	0.113574		0.384923
	0.113541		0.206629
	0.113304		0.74123
	0.113258		0.150855
	0.113253		0.326317
	0.113123		0.0415623
	0.113116		0.00949748
	0.113076		0.0147739
	0.112906		0.264794
	0.112742		0.799708
	0.112175		1.10768
	0.111895		0.330479
	0.111854		0.544047
	0.111819		0.269032
	0.111451		0.503008
	0.110801		0.331795
	0.110278		0.501138
	0.11019		0.634942
	0.110126		0.684084
	0.110102		0.740542
	0.110076		1.20361
	0.109972		0.603662
	0.109907		0.383445
	0.109852		0.104352
	0.10974		0.0831095
	0.109491		0.544302
	0.109475		0.231338
	0.109376		0.0428641
	0.10932		0.353274
	0.109162		0.0635244
	0.10903		0.0615085
	0.108562		0.185567
	0.108335		0.093362
	0.108309		0.578929
	0.108254		1.54809
	0.108141		1.24299
	0.108138		1.00612
	0.107781		0.33794
	0.107771		0.0486597
	0.107733		0.226467
	0.107638		0.0516117
	0.107569		0.564515
	0.107491		0.247091
	0.107399		0.125429
	0.107077		0.923749
	0.107027		0.0311337
	0.106719		0.99577
	0.106715		0.36698
	0.105827		0.625307
	0.105583		0.282461
	0.105482		0.172897
	0.105473		0.502563
	0.1049		0.726166
	0.104677		0.407452
	0.104351		2.8365
	0.104336		0.831947
	0.104199		1.02323
	0.103442		0.670212
	0.103155		0.2906
	0.102912		0.880219
	0.102621		0.0729117
	0.102275		0.179386
	0.101853		0.037807
	0.101808		0.262324
	0.101781		0.560241
	0.101563		0.866591
	0.101346		0.00996757
	0.101183		0.111989
	0.101032		0.242171
	0.100843		0.576968
	0.100408		0.00368695
	0.100097		0.307297
	0.100093		0.868069
	0.0996354		0.179077
	0.0995853		0.0965908
	0.0995491		0.675121
	0.0995018		0.229324
	0.0994148		0.00939741
	0.0993708		0.203238
	0.0988158		0.70816
	0.0986699		0.257195
	0.0984948		0.0816715
	0.098421		0.837165
	0.0981913		0.0600238
	0.0978639		0.204381
	0.0978616		1.14586
	0.0978411		0.552007
	0.0975984		0.438967
	0.097577		0.125321
	0.0974789		0.543775
	0.097407		0.011095
	0.0973545		1.09858
	0.0972228		0.348135
	0.0971456		0.396598
	0.0970141		1.25002
	0.0967815		1.21328
	0.0965876		0.124083
	0.0965084		1.1183
	0.0961041		0.00470022
	0.0958715		0.0999206
	0.0956156		0.229095
	0.0955512		0.573228
	0.0948648		0.207898
	0.0946829		0.0328895
	0.0945148		0.131331
	0.094458		0.729981
	0.0938429		0.0425009
	0.0932041		0.280856
	0.0928664		0.083627
	0.0926746		0.637741
	0.0925453		0.475705
	0.092517		0.0518666
	0.0924143		0.644494
	0.0923432		0.221331
	0.092313		0.330889
	0.0919711		1.09874
	0.091749		0.1021
	0.0915679		1.86753
	0.0912261		2.25463
	0.0908481		0.682706
	0.0906841		0.0212855
	0.0901137		0.0781001
	0.0900156		0.07979
	0.0900117		0.505918
	0.0898821		0.111622
	0.089844		0.0241924
	0.0895288		0.0618248
	0.0892115		0.275324
	0.0891836		1.42268
	0.0891049		0.422813
	0.08869		1.20931
	0.0883409		0.292046
	0.0882458		1.54985
	0.0882154		0.216403
	0.0881082		0.414563
	0.0880848		0.356583
	0.0877287		0.944589
	0.087722		0.0730078
	0.0875881		1.33616
	0.0869549		0.965553
	0.086581		0.261249
	0.0864306		0.205217
	0.0862431		1.44045
	0.0861527		0.264109
	0.0860857		0.330783
	0.0854753		0.243396
	0.0851905		0.5302
	0.0851407		0.0191916
	0.0849136		0.449924
	0.0848044		0.402
	0.084741		0.0678496
	0.0846584		0.405132
	0.0846054		1.23719
	0.0843799		0.114041
	0.0838785		0.110954
	0.0838352		0.478561
	0.083802		0.357705
	0.0837163		0.534913
	0.0835831		0.143435
	0.0835509		0.479708
	0.0834208		0.380099
	0.0833147		0.386791
	0.0832515		0.353765
	0.0831094		0.653962
	0.0830042		0.266298
	0.0828058		0.110908
	0.0827516		0.668546
	0.0825793		1.27377
	0.0821015		1.08811
	0.0817783		1.32022
	0.0815438		0.108926
	0.0814393		0.0876038
	0.0812854		0.298461
	0.0809848		0.0615763
	0.0808007		0.455401
	0.0807449		0.414583
	0.0807078		0.852847
	0.0803934		0.0699086
	0.0803863		0.270835
	0.0803804		0.789333
	0.0802135		0.609567
	0.0801871		0.074744
	0.0801431		0.0191746
	0.0797537		0.88801
	0.0796159		0.4937
	0.0792563		0.348398
	0.0792401		0.130496
	0.0791937		0.543968
	0.0789351		0.440986
	0.0783964		0.0934139
	0.0780822		0.565602
	0.0779122		0.125864
	0.0779075		0.118622
	0.0779013		0.789264
	0.077826		0.383688
	0.077671		0.071162
	0.0775136		0.952463
	0.0774533		0.0879774
	0.0772416		0.15635
	0.0772148		0.933692
	0.0768875		0.64058
	0.0768833		0.220625
	0.0768083		0.126395
	0.0767041		0.429254
	0.0766892		0.688558
	0.0764649		0.0700896
	0.0764451		0.083107
	0.0755435		0.550561
	0.0755192		0.114793
	0.0754992		0.311762
	0.0753186		0.756672
	0.0752786		1.21784
	0.0752641		0.162494
	0.075204		0.734564
	0.0750266		0.330254
	0.0748694		0.100518
	0.0747209		0.259511
	0.0745477		0.685111
	0.0744666		0.0757311
	0.07401		0.285305
	0.073835		0.843975
	0.0737288		0.299009
	0.0737009		0.6976
	0.0736428		0.213072
	0.0733763		0.901881
	0.0732624		0.923019
	0.0728		0.0100037
	0.0726508		0.340613
	0.0726406		0.886556
	0.0724665		0.148038
	0.0724019		0.0243386
	0.0722471		1.22419
	0.0721876		0.872143
	0.0719193		0.218713
	0.0717132		0.147776
	0.0716865		0.683588
	0.0714365		0.867348
	0.0713346		0.0503755
	0.0712273		0.143961
	0.0711922		0.521868
	0.0710108		0.0189184
	0.0707015		0.0715955
	0.0706572		0.0783983
	0.0705269		0.0675971
	0.0702256		0.268395
	0.0699325		0.0834244
	0.069851		0.532809
	0.0696521		0.587012
	0.06964		0.524399
	0.0696176		0.0993712
	0.0694972		0.276981
	0.0692491		0.0364898
	0.0691358		0.773614
	0.0690743		0.0908671
	0.0688764		0.694183
	0.0687799		0.483707
	0.0687578		4.22392
	0.0685288		0.507709
	0.0683686		0.0387514
	0.0682209		0.900746
	0.0679602		0.594191
	0.0675141		0.943433
	0.0673436		0.319096
	0.0667405		0.229978
	0.0666794		0.780508
	0.066669		0.539942
	0.0666557		0.426263
	0.0664407		0.0330821
	0.0663492		0.0887972
	0.066137		0.79188
	0.0660659		1.02141
	0.0656619		0.0212275
	0.0656516		1.39234
	0.0654836		0.284485
	0.0653168		0.841079
	0.0652028		4.52373
	0.0650876		0.411466
	0.0650217		0.0495992
	0.0649814		0.0312466
	0.0646536		0.788756
	0.0643587		0.910512
	0.0642998		0.217863
	0.0641041		2.44941
	0.0637789		0.588572
	0.0637027		0.113784
	0.0636073		3.54909
	0.0634244		0.0648999
	0.0631495		0.566857
	0.0630023		0.24985
	0.062878		0.0791728
	0.0628762		0.086026
	0.0623664		1.17752
	0.0623507		0.113353
	0.0622127		0.566134
	0.0621657		0.0139094
	0.0621533		0.151796
	0.0618941		0.868409
	0.0617593		1.0383
	0.0616731		0.45313
	0.0616557		0.506496
	0.0614952		0.452564
	0.0614504		1.25953
	0.0612395		0.482871
	0.0611222		0.0278886
	0.0611171		0.906678
	0.0609983		0.290883
	0.0609019		0.3644
	0.0608379		1.39124
	0.0607359		1.19162
	0.060612		0.3787
	0.0603347		0.0905799
	0.0601902		0.203344
	0.0598631		0.632889
	0.0598512		0.218094
	0.059847		0.726229
	0.0598379		0.755099
	0.0592979		0.103383
	0.0592939		0.34128
	0.0590711		0.0363008
	0.0589767		0.850386
	0.0589736		0.153039
	0.0588688		0.324289
	0.0588136		0.0683609
	0.0587784		1.07123
	0.058593		0.355856
	0.0585471		1.24291
	0.0585116		0.583912
	0.0584849		0.433427
	0.058415		1.03718
	0.0583671		1.58394
	0.0583562		0.769868
	0.0582307		1.00602
	0.0581288		0.061215
	0.0577143		0.166911
	0.0575907		0.493575
	0.0573442		0.898754
	0.0570419		0.666333
	0.0569732		2.16958
	0.0565318		0.585523
	0.0564389		0.0776881
	0.056436		0.641004
	0.0563765		0.614265
	0.0561972		1.86254
	0.0561181		0.362228
	0.0561018		0.312456
	0.0559686		0.682527
	0.055922		0.293065
	0.0556821		1.70491
	0.055382		0.199039
	0.0551642		0.114213
	0.0550946		2.15439
	0.054905		0.0179138
	0.0548161		0.0957172
	0.0546989		0.0632813
	0.054602		0.214637
	0.0545603		1.01605
	0.0544904		0.54492
	0.054416		0.22954
	0.0542665		0.645027
	0.0541969		0.238184
	0.0541281		0.186182
	0.0540841		0.195513
	0.0539797		0.571279
	0.0538468		1.71565
	0.0537423		0.244278
	0.0537269		0.21553
	0.0535893		0.696155
	0.0533093		0.173339
	0.0532154		0.217646
	0.0531286		1.14959
	0.0529599		0.209249
	0.052922		0.83803
	0.0528759		0.217407
	0.0525477		0.155901
	0.0524951		0.655125
	0.0524731		0.251602
	0.0524437		0.946871
	0.0524217		0.512376
	0.0523355		1.19866
	0.0523198		1.06129
	0.0520994		0.319768
	0.0520303		0.105476
	0.0518484		0.197502
	0.0518403		1.1176
	0.0518395		0.0444468
	0.0516923		0.421178
	0.0516356		0.31314
	0.0515996		0.0557722
	0.051595		0.380111
	0.0515675		0.787308
	0.0515407		0.637531
	0.0515362		0.0361939
	0.0514575		0.410166
	0.0513994		0.287848
	0.0513365		0.503656
	0.0511503		0.161017
	0.0510717		1.66251
	0.0506697		0.0744278
	0.0506459		0.0446269
	0.0506334		1.08962
	0.0502321		0.287232
	0.0501651		0.194602
	0.0501544		0.0110024
	0.0501448		0.32882
	0.0501339		0.618621
	0.0497916		1.07923
	0.0497329		0.114258
	0.0497064		0.216299
	0.0496433		0.292851
	0.0495715		0.00349006
	0.0493312		0.622611
	0.049272		0.446292
	0.0491709		0.00427828
	0.0487276		0.228439
	0.0486786		1.13276
	0.0486414		0.278071
	0.0484773		0.040828
	0.0483206		1.10762
	0.0483009		0.334233
	0.0482714		0.182499
	0.0480176		1.92385
	0.0479863		0.0511378
	0.0479751		0.205204
	0.0479575		0.144848
	0.0476306		0.51941
	0.0476101		2.58792
	0.0474957		0.0969113
	0.0474109		0.360815
	0.0467308		0.141515
	0.0464329		0.294948
	0.0461405		0.759155
	0.0460787		0.0209815
	0.045791		0.42199
	0.0454185		0.305995
	0.045386		0.217099
	0.0452514		0.0232078
	0.0452167		0.221204
	0.0452035		0.111509
	0.0451267		0.0685836
	0.0448975		0.308291
	0.0448886		0.0193362
	0.0446022		0.0807507
	0.0446005		1.25388
	0.0445945		0.962383
	0.0445409		1.41926
	0.0445359		0.316731
	0.044513		0.172626
	0.0444495		0.394591
	0.0444293		0.588835
	0.0443797		0.890355
	0.0442087		0.100903
	0.0440582		0.000496243
	0.0436271		0.251974
	0.0433933		0.239156
	0.0432777		0.077936
	0.0432442		0.920938
	0.0430586		0.0412881
	0.0426041		0.111918
	0.0425479		1.1794
	0.0424859		2.55733
	0.0424618		0.248156
	0.0423967		1.07481
	0.0423643		0.343821
	0.042358		0.129649
	0.0422958		0.196015
	0.0419275		0.151225
	0.0419219		0.181855
	0.0416714		0.105309
	0.0413217		0.210203
	0.0413058		0.960437
	0.0412428		0.0247652
	0.0411851		0.0155909
	0.0411816		2.58503
	0.0408861		1.17529
	0.04074		0.171157
	0.0405423		0.44722
	0.0398236		0.833996
	0.0397247		0.0428421
	0.0395044		0.609931
	0.0393885		0.332415
	0.0393833		0.191083
	0.0392162		0.171297
	0.0390831		0.209167
	0.0390475		0.0213693
	0.0390141		0.0553834
	0.0389304		0.441736
	0.0388344		0.281467
	0.0388194		0.391519
	0.038814		0.0451683
	0.038679		0.0797429
	0.0383431		0.731164
	0.0383071		0.141756
	0.0381194		0.0333157
	0.0379294		0.103403
	0.0378745		0.279131
	0.0378638		0.272247
	0.0375199		0.813188
	0.0375184		0.0588275
	0.0374808		0.0862642
	0.0374696		0.830568
	0.0374557		0.662655
	0.0374026		1.34585
	0.0373281		0.561385
	0.0370897		0.317416
	0.0370109		0.028115
	0.0368412		0.63342
	0.0367247		0.279911
	0.0366316		0.21789
	0.036588		0.0746318
	0.0365874		0.74641
	0.036544		0.0310331
	0.0364843		0.22038
	0.036247		0.515662
	0.0362397		0.366026
	0.0361947		0.770294
	0.0359886		0.229648
	0.0359484		0.254175
	0.035943		0.47498
	0.0358035		0.401498
	0.0353996		1.60699
	0.0353844		0.194796
	0.0352626		0.176407
	0.0351914		0.063725
	0.0350136		0.1388
	0.0349428		1.0503
	0.0348852		1.43182
	0.0348581		0.567584
	0.0345638		0.115798
	0.0342939		0.234234
	0.034232		0.364416
	0.034218		0.341035
	0.0342177		0.3661
	0.0342032		0.125319
	0.0340361		0.06064
	0.034004		0.770784
	0.0339775		0.206707
	0.0338846		0.690469
	0.0336689		0.20655
	0.033541		0.659683
	0.0331659		0.964497
	0.0330469		1.09841
	0.0329959		0.143443
	0.0329545		0.310592
	0.0326389		0.680881
	0.0325986		1.05722
	0.0323059		1.73345
	0.0322296		0.733922
	0.0320383		0.186959
	0.031983		0.155765
	0.0319363		0.589518
	0.0318976		0.417947
	0.0317067		0.0397877
	0.0316284		0.0900418
	0.031626		0.630301
	0.0315887		0.348686
	0.0314244		0.0837978
	0.031323		0.199009
	0.0312813		0.182372
	0.0311127		0.0969226
	0.0309735		0.508279
	0.0308465		0.195219
	0.0307911		0.302102
	0.0307775		0.318087
	0.030461		1.65317
	0.0303978		0.934018
	0.0302404		0.81302
	0.0302342		0.0815316
	0.0301281		0.288281
	0.0299641		0.0761265
	0.0299001		1.63906
	0.0298983		0.376002
	0.0298417		0.152605
	0.0298337		0.206831
	0.0295748		1.19016
	0.0293696		1.03112
	0.0293309		1.293
	0.0292527		0.199842
	0.0290911		0.0169849
	0.0290095		0.133453
	0.0287446		0.0304956
	0.0286504		0.844938
	0.0284267		0.112521
	0.0284052		0.794882
	0.0283379		0.140297
	0.0277362		0.0586251
	0.0276323		0.396393
	0.0275955		0.136062
	0.0275924		0.585491
	0.0274239		1.3781
	0.0273182		0.150807
	0.0272731		0.0729589
	0.0270907		0.0340629
	0.026857		0.534808
	0.0268362		0.617816
	0.0266671		0.0435262
	0.026661		0.636426
	0.0266591		2.11252
	0.0266205		0.364437
	0.0265206		0.0292098
	0.0264933		1.27435
	0.0264764		0.900896
	0.0264336		0.0645176
	0.0262798		0.609721
	0.0262633		0.0891889
	0.0262557		0.310091
	0.0261683		0.133345
	0.026042		0.244185
	0.0260176		0.427613
	0.0258305		1.5733
	0.02579		0.260561
	0.0257785		0.169611
	0.0257476		0.27977
	0.0257322		1.40411
	0.0254084		0.129305
	0.025097		2.04552
	0.0250265		0.807911
	0.0249048		0.135426
	0.0247738		0.262408
	0.0247723		0.153594
	0.0247714		0.0693451
	0.0246225		0.923778
	0.0246056		0.424631
	0.024269		0.0101721
	0.0242628		0.633366
	0.0241231		0.632441
	0.024114		0.142125
	0.0239795		0.286428
	0.0239695		0.103201
	0.0239692		0.255546
	0.023901		0.799026
	0.0238018		0.28095
	0.0237039		0.0739695
	0.0236831		0.0783189
	0.023627		0.278555
	0.0235911		0.717868
	0.0233702		0.689571
	0.0233558		1.5006
	0.0231931		1.46049
	0.0230606		0.79004
	0.0228416		0.290669
	0.0228056		0.18961
	0.0226589		0.0964304
	0.0224872		1.16838
	0.022456		1.22227
	0.022364		0.0693348
	0.0223127		0.167938
	0.0223066		0.516013
	0.0222729		0.145028
	0.0222466		0.847808
	0.0221604		0.532585
	0.0220867		0.171557
	0.0220217		0.0668758
	0.021814		0.466995
	0.021783		0.578366
	0.021643		0.0420391
	0.0215904		0.275019
	0.0215738		0.0773119
	0.0214149		0.0788648
	0.0211397		0.203886
	0.0210279		0.0837107
	0.0208498		0.161615
	0.0208476		0.406955
	0.020751		0.283871
	0.0206862		0.272033
	0.0206115		0.735571
	0.0203654		0.700904
	0.0202776		0.438534
	0.0201698		0.394978
	0.02016		0.0629487
	0.0201294		0.263255
	0.0201045		0.0232122
	0.0199963		1.2171
	0.0197757		0.730261
	0.0196274		1.07849
	0.0192146		0.717845
	0.0191021		0.502
	0.0190646		1.23039
	0.0188912		0.148224
	0.0188813		0.268628
	0.0188387		0.484944
	0.0187907		0.327407
	0.0185135		0.469324
	0.0184443		1.3943
	0.0183253		0.76808
	0.0182573		0.922253
	0.018245		0.0072515
	0.018239		0.132638
	0.0182148		0.0144118
	0.0181563		1.38449
	0.0181414		0.152007
	0.0181364		0.165835
	0.0181287		0.884858
	0.0178466		0.392647
	0.0178162		0.0345295
	0.0178058		0.83567
	0.0177639		0.904706
	0.0174243		0.276795
	0.0172912		0.0209065
	0.0172179		0.00674454
	0.0166404		1.16702
	0.0165611		0.322671
	0.0164832		0.855252
	0.0160703		0.15377
	0.0160127		0.14971
	0.0158599		0.695296
	0.0158554		0.302265
	0.0156297		0.232026
	0.0153984		1.18598
	0.0153953		0.364658
	0.015363		0.187984
	0.01536		0.162581
	0.0153579		0.00935945
	0.0153256		0.0598154
	0.015305		0.0736721
	0.0152925		0.0645686
	0.0149319		1.2455
	0.0147169		0.262846
	0.0146126		0.215191
	0.0141315		0.0501017
	0.0140494		0.698207
	0.0140408		0.235433
	0.0140055		1.12869
	0.0139044		0.745099
	0.013858		0.0937437
	0.0137681		0.196035
	0.0136894		0.277326
	0.0136713		0.0868246
	0.0135288		0.622207
	0.0133625		0.058019
	0.0131091		0.0539889
	0.0130822		0.0569343
	0.012944		0.0985852
	0.0128216		0.319415
	0.0126305		0.254504
	0.0125171		0.216233
	0.0123778		0.042388
	0.012327		0.179162
	0.0122868		0.377437
	0.0122503		0.313527
	0.0122172		0.412362
	0.0118192		0.104245
	0.0118114		0.799439
	0.0117431		0.428071
	0.0115782		0.370647
	0.0113293		0.24303
	0.0112836		0.134373
	0.011201		0.0109998
	0.0110601		0.428558
	0.0108384		0.0163953
	0.0107278		0.138787
	0.010714		0.116391
	0.0106657		0.0281838
	0.0105837		0.5959
	0.0105485		0.429715
	0.0104513		0.351341
	0.0103494		0.725976
	0.0103146		0.460503
	0.0102845		0.16869
	0.0102518		0.229941
	0.0102276		0.150361
	0.0101423		0.308351
	0.010107		1.05397
	0.00991041		1.31023
	0.00976565		0.261098
	0.00964978		0.19779
	0.0095868		0.120291
	0.00955375		0.0352576
	0.00954869		0.188724
	0.00951204		0.134423
	0.00950381		0.427667
	0.00946228		0.290648
	0.0094218		0.092568
	0.00939481		0.0396348
	0.00916398		0.372048
	0.00909662		0.177719
	0.00894791		0.471029
	0.00891792		0.18461
	0.00880057		0.323373
	0.00878523		0.0993227
	0.00839682		0.222475
	0.00836521		0.0838914
	0.00818673		0.187521
	0.00791793		0.499113
	0.0077032		0.478596
	0.00770273		0.0190019
	0.00766663		0.23141
	0.00760946		0.171259
	0.00743001		0.653529
	0.00740335		0.0363348
	0.00724328		0.133228
	0.00692286		0.274397
	0.00685384		0.289607
	0.00676454		0.331809
	0.00665894		0.169232
	0.00610921		0.364524
	0.00606829		0.0402519
	0.00599252		0.422571
	0.00576425		0.130424
	0.00576052		0.107545
	0.00572969		0.0854458
	0.00570095		0.365337
	0.00565601		0.178963
	0.00563503		0.121359
	0.0055762		0.0359739
	0.00555236		0.00152027
	0.00551538		0.158455
	0.00549834		0.141559
	0.00544569		0.375945
	0.00517505		0.112023
	0.00508479		0.228531
	0.00507844		0.242691
	0.00507372		0.269944
	0.00480973		0.0823458
	0.0047966		0.199165
	0.00460099		0.763999
	0.00441806		0.00653655
	0.00418716		0.276083
	0.00416773		0.126229
	0.00413301		0.00259626
	0.00395504		0.0399241
	0.00368562		0.01879
	0.00366941		0.12679
	0.00354859		0.608667
	0.00324628		0.40186
	0.00324133		0.0914012
	0.00302516		0.157666
	0.00300843		0.459182
	0.00300508		0.197117
	0.00283367		0.0152388
	0.00281405		1.52156
	0.00279995		0.0307141
	0.00271373		0.167431
	0.0026955		0.168806
	0.00248463		0.808442
	0.00243393		0.214082
	0.00240883		0.0282425
	0.00225195		0.185226
	0.00211467		0.0024264
	0.00177228		0.460859
	0.00157442		0.47709
	0.00151874		0.332353
	0.00136161		0.115651
	0.00118649		0.145469
	0.000947986		0.246892
	0.000895933		0.316343
	0.000235341		0.153544
	0.000152381		0.10257
	3.06e-05		0.246998
Figure 6h	Pathway analysis for 19 differential metabolites
	Pathway Name	p value	-Log10(p value)	Pathway Impact	Details
	Galactose metabolism	0.0059888	2.2227	0.46646	KEGG SMP
	Valine, leucine and isoleucine biosynthesis	0.036172	1.4416	0	KEGG
	Vitamin B6 metabolism	0.040613	1.3913	0.07843	KEGG SMP
	Fructose and mannose metabolism	0.079805	1.098	0	KEGG
	Pantothenate and CoA biosynthesis	0.088325	1.0539	0	KEGG SMP
	Cysteine and methionine metabolism	0.14208	0.84748	0.10446	KEGG SMP SMP
	Valine, leucine and isoleucine degradation	0.16988	0.76987	0	KEGG SMP
	Amino sugar and nucleotide sugar metabolism	0.17768	0.75037	0	KEGG
	Purine metabolism	0.28392	0.54681	0.02854	KEGG SMP
Figure 6i	var	D-(+)-Galactose	Acetanilide	2-Hydroxycinnamic acid	LSD-d3	3-Hydroxy-3-methylglutaric acid	2-Aminoadipic acid	L(-)-Fucose	7-Methylguanine	Pyridoxamine	Methionine	Coumarin	α-Lactose	LPC 16:1	Xanthine	LPE 16:0	Valine	16-Hydroxyhexadecanoic acid	16,16-Dimethyl prostaglandin A1	FAHFA (18:1/20:3)
	D-(+)-Galactose	1	0.464348	0.64	0.244348	0.568696	0.453913	0.657391	0.385217	0.0913043	0.338261	0.68087	0.244348	0.0565217	0.233043	0.101739	0.210435	-0.342609	-0.325217	0.191304
	Acetanilide	0.464348	1	0.630435	0.586957	0.654783	0.476522	0.356522	0.470435	0.573043	0.645217	0.653913	0.554783	0.591304	0.53913	0.617391	0.231304	-0.472174	-0.409565	0.613913
	2-Hydroxycinnamic acid	0.64	0.630435	1	0.0904348	0.633913	0.402609	0.526957	0.44	0.341739	0.647826	0.713913	0.281739	0.154783	0.472174	0.121739	0.149565	-0.31913	-0.086087	0.233913
	LSD-d3	0.244348	0.586957	0.0904348	1	0.554783	0.644348	-0.0443478	0.61913	0.589565	0.113913	0.305217	0.655652	0.664348	0.594783	0.737391	0.661739	-0.431304	-0.775652	0.791304
	3-Hydroxy-3-methylglutaric acid	0.568696	0.654783	0.633913	0.554783	1	0.792174	0.273913	0.563478	0.601739	0.153913	0.575652	0.562609	0.361739	0.695652	0.365217	0.385217	-0.508696	-0.44087	0.590435
	2-Aminoadipic acid	0.453913	0.476522	0.402609	0.644348	0.792174	1	-0.0617391	0.644348	0.469565	0.00869565	0.289565	0.766087	0.489565	0.632174	0.497391	0.604348	-0.524348	-0.524348	0.722609
	L(-)-Fucose	0.657391	0.356522	0.526957	-0.0443478	0.273913	-0.0617391	1	0.0591304	0.24	0.425217	0.649565	-0.0443478	-0.131304	0.0956522	-0.0130435	-0.148696	0.0208696	-0.0173913	-0.118261
	7-Methylguanine	0.385217	0.470435	0.44	0.61913	0.563478	0.644348	0.0591304	1	0.446957	0.305217	0.474783	0.613913	0.483478	0.76087	0.385217	0.7	-0.472174	-0.614783	0.562609
	Pyridoxamine	0.0913043	0.573043	0.341739	0.589565	0.601739	0.469565	0.24	0.446957	1	0.216522	0.406957	0.689565	0.554783	0.677391	0.658261	0.283478	-0.369565	-0.467826	0.572174
	Methionine	0.338261	0.645217	0.647826	0.113913	0.153913	0.00869565	0.425217	0.305217	0.216522	1	0.526957	0.130435	0.15913	0.176522	0.130435	0.00608696	-0.0452174	0.0634783	0.0965217
	Coumarin	0.68087	0.653913	0.713913	0.305217	0.575652	0.289565	0.649565	0.474783	0.406957	0.526957	1	0.342609	0.27913	0.376522	0.287826	0.0669565	-0.466957	-0.358261	0.3
	α-Lactose	0.244348	0.554783	0.281739	0.655652	0.562609	0.766087	-0.0443478	0.613913	0.689565	0.130435	0.342609	1	0.694783	0.62	0.786957	0.442609	-0.693913	-0.684348	0.821739
	LPC 16:1	0.0565217	0.591304	0.154783	0.664348	0.361739	0.489565	-0.131304	0.483478	0.554783	0.15913	0.27913	0.694783	1	0.423478	0.906957	0.408696	-0.604348	-0.563478	0.753913
	Xanthine	0.233043	0.53913	0.472174	0.594783	0.695652	0.632174	0.0956522	0.76087	0.677391	0.176522	0.376522	0.62	0.423478	1	0.407826	0.550435	-0.515652	-0.511304	0.605217
	LPE 16:0	0.101739	0.617391	0.121739	0.737391	0.365217	0.497391	-0.0130435	0.385217	0.658261	0.130435	0.287826	0.786957	0.906957	0.407826	1	0.371304	-0.592174	-0.683478	0.79913
	Valine	0.210435	0.231304	0.149565	0.661739	0.385217	0.604348	-0.148696	0.7	0.283478	0.00608696	0.0669565	0.442609	0.408696	0.550435	0.371304	1	-0.18087	-0.58	0.411304
	16-Hydroxyhexadecanoic acid	-0.342609	-0.472174	-0.31913	-0.431304	-0.508696	-0.524348	0.0208696	-0.472174	-0.369565	-0.0452174	-0.466957	-0.693913	-0.604348	-0.515652	-0.592174	-0.18087	1	0.618261	-0.670435
	16,16-Dimethyl prostaglandin A1	-0.325217	-0.409565	-0.086087	-0.775652	-0.44087	-0.524348	-0.0173913	-0.614783	-0.467826	0.0634783	-0.358261	-0.684348	-0.563478	-0.511304	-0.683478	-0.58	0.618261	1	-0.752174
	FAHFA (18:1/20:3)	0.191304	0.613913	0.233913	0.791304	0.590435	0.722609	-0.118261	0.562609	0.572174	0.0965217	0.3	0.821739	0.753913	0.605217	0.79913	0.411304	-0.670435	-0.752174	1
Figure 6i	Var1	Var2	cor	p_value
	f__Muribaculaceae	D-(+)-Galactose	0.455652	0.0252461
	f__Muribaculaceae	Acetanilide	0.33913	0.104983
	f__Muribaculaceae	2-Hydroxycinnamic acid	0.273913	0.195252
	f__Muribaculaceae	LSD-d3	0.483478	0.0166886
	f__Muribaculaceae	3-Hydroxy-3-methylglutaric acid	0.516522	0.00976161
	f__Muribaculaceae	2-Aminoadipic acid	0.588696	0.00247576
	f__Muribaculaceae	L(-)-Fucose	0.252174	0.234528
	f__Muribaculaceae	7-Methylguanine	0.213043	0.317545
	f__Muribaculaceae	Pyridoxamine	0.367826	0.0769989
	f__Muribaculaceae	Methionine	0.133913	0.532736
	f__Muribaculaceae	Coumarin	0.357391	0.0864298
	f__Muribaculaceae	α-Lactose	0.372174	0.0733081
	f__Muribaculaceae	LPC 16:1	0.113913	0.596114
	f__Muribaculaceae	Xanthine	0.316522	0.131834
	f__Muribaculaceae	LPE 16:0	0.197391	0.355208
	f__Muribaculaceae	Valine	0.238261	0.262218
	f__Muribaculaceae	16-Hydroxyhexadecanoic acid	-0.133043	0.535424
	f__Muribaculaceae	16,16-Dimethyl prostaglandin A1	-0.212174	0.319571
	f__Muribaculaceae	FAHFA (18:1/20:3)	0.357391	0.0864298
	f__Lactobacillaceae	D-(+)-Galactose	-0.753913	2.09735e-05
	f__Lactobacillaceae	Acetanilide	-0.510435	0.0108172
	f__Lactobacillaceae	2-Hydroxycinnamic acid	-0.478261	0.0180806
	f__Lactobacillaceae	LSD-d3	-0.502609	0.0123112
[truncated: 15 more rows]

## Sheet: Figure 7
Figure 7d	Immunohistochemical quantitative data (mean of 10 high magnification fields of view/mouse)
	ATBx mice (Number of positive cells)			0.2% Tre mice (Number of positive cells)			GF mice (Number of positive cells)
	Groups	MPO	F4/80	Groups	MPO	F4/80	Groups	MPO	F4/80
	BC	0	0.1	BC	0	0	SAP	11.7	12.6
		0.1	0		0	0		12.3	10.7
		0.2	0		0	0		13.1	9.1
		0	0.2		0.2	0		11.1	12.7
		0	0.2		0.1	0.1		10.7	11.6
		0	0		0	0		9.4	13.7
		0.3	0		0	0		8.1	8.1
		0	0		0	0		12.6	9.7
		0	0		0	0		15.8	10.6
		0.1	0		0.1	0		13.8	11.5
		0	0.3		0	0.2		11.4	13
		0.1	0		0.2	0		9.5	12.2
	ATBx	0	0.2		0	0	Tre+SAP	12.9	12.2
		0	0		0.1	0		8.4	13.5
		0	0		0	0		12.7	14.3
		0	0		0	0		11.3	12.7
		0	0		0	0		10.1	10.9
		0.1	0	0.2% Tre	0.1	0.2		7.7	9.2
		0	0		0	0		9.2	9.8
		0.2	0		0	0		12.7	8.2
		0.1	0.2		0	0		9.5	4.3
		0	0.2		0	0.1		13.2	14
		0	0.1		0.1	0		11	11.1
		0	0		0	0		8.8	10.6
	SAP	18.5	13.6		0	0	BC-FMT+SAP	18.6	11.2
		12.3	14		0	0		17.3	14.5
		16.7	15.8		0	0		15.6	15.4
		15.8	14		0	0.1		14.2	12
		19.1	16.8		0	0		17.7	16.2
		14.6	14.1		0.2	0		19.8	15.7
		13.6	16.4		0	0.1		13.9	14.1
		14.7	14.6		0	0		12.7	15.8
		16.6	12.4		0	0		10.9	13.7
		19.2	12.8		0	0		9.2	12.9
		17.6	10.6	SAP	26.9	24.7		17.6	11.4
		11.1	17.9		29.3	29		16.7	8.6
	ATBx+SAP	12.5	14.3		28.2	28.5	Tre-FMT+SAP	11.2	10.6
		14.1	13.6		25.3	27.8		12.6	9.2
		15.6	11.8		27.6	26.4		17.5	8
		17.4	10.2		26.4	21		16	7
		16	8		24.9	21.9		15.1	12.5
		13.8	6.7		21.8	26.4		14.6	10.6
		9.6	12.5		18.9	18.6		13.2	11.7
		16.9	10.4		15.4	19		12.4	9.8
		11.8	12.7		22.5	22		14	12
		10.4	11.9		26.3	21.3		13.1	14.6
		11.9	14.7		20.3	25.6		12	13
		12.7	16.2		24.4	24.3		17.8	12
					25.3	25.7
					22.2	23.9
					22.5	22.7
				0.2% Tre+SAP	20	18.5
					23	19.6
					22.1	21.3
					28	22.7
					27	24.1
					26.2	16.8
					21.9	15.4
					22.6	14.9
					25.3	23.2
					26.4	16.6
					21.3	26.1
					24.8	20
					21.5	23.9
					24.3	24.9
					20.9	22.6
					26	25.3
					21.6	23.8
Figure 7e	Immunofluorescence quantitative data (mean of 10 high magnification fields of view/mouse)
	ATBx mice (Number of positive cells)			0.2% Tre mice (Number of positive cells)			GF mice (Number of positive cells)
	Groups	MPO	F4/80	Groups	MPO	F4/80	Groups	MPO	F4/80
	BC	0	0	BC	0	0	SAP	4.5	6.4
		0	0		0	0		0.7	7
		0	0		0	0		3.3	4.6
		0	0		0	0		2.9	8.6
		0	0		0	0		1.6	9.2
		0	0		0	0		5.5	10.9
		0	0		0	0		6.8	4.2
		0	0		0	0		5.9	4.6
		0	0		0	0		4	13.5
		0	0		0	0		2.1	11.4
		0	0		0	0		7.3	5
		0	0		0	0		5.5	6.3
	ATBx	0	0		0	0	Tre+SAP	2.4	10.6
		0	0		0	0		6.1	9
		0	0		0	0		5.5	11.3
		0	0		0	0		4.1	12.9
		0	0		0	0		7.6	6
		0	0	0.2% Tre	0	0		2.7	6.5
		0	0		0	0		3.3	7.7
		0	0		0	0		4.4	8.8
		0	0		0	0		5.9	9.9
		0	0		0	0		4.5	7.5
		0	0		0	0		3.5	5
		0	0		0	0		3.4	6.3
	SAP	6.3	9		0	0	BC-FMT+SAP	8.7	13.9
		7.5	10.2		0	0		5	12.8
		8.9	11.4		0	0		7.7	11.6
		9.8	10.7		0	0		4	10.5
		7.3	9.1		0	0		6.5	9.5
		6.2	12.6		0	0		5.4	13
		5.6	9.4		0	0		3.7	9.7
		4.4	11.1		0	0		5.4	11.2
		9.6	10.1		0	0		6.3	8.6
		8.6	8.6		0	0		4.8	13.4
		7.1	7	SAP	6.8	11.5		8.7	8.4
		5.5	6.6		7.8	8.7		6.7	9.7
	ATBx+SAP	3.1	5.7		8.9	6.9	Tre-FMT+SAP	3.9	8.2
		4.4	8.2		5.4	5.7		5.8	9.3
		5.9	4.9		9.3	10.7		6.6	10.8
		6.4	5.3		7.6	8.5		4.1	11.4
		7.2	7.6		8.3	9.1		5	9.6
		3.4	10.8		6.6	7.3		8.8	8.7
		4.1	9.9		4.2	10.1		7.6	8.5
		4	6.5		5.6	7.2		9.1	7.9
		2	9.9		6.6	9.3		8.4	10.2
		9.6	7.5		4.7	8.5		7.8	13
		6.8	6.8		8.2	10.7		4.9	8.4
		5	11		7.8	9.8		5.4	5.3
					5.8	10.2
					7.2	8.3
					6.5	7.9
				0.2% Tre+SAP	8.8	9.6
					6	6.3
					5.8	8.8
					3	6.3
					4	7.7
					9.1	6.9
					7	6.2
					4.6	7.1
					6.3	5.8
					4.8	8.1
					7.5	6
					7.2	6.7
					8.5	8.3
					6.4	7.7
					6.8	8.9
					7.1	9.5
					5.3	9.4

## Sheet: Figure 8
Figure 8d	Immunohistochemical quantitative data (mean of 10 high magnification fields of view/mouse)
	ATBx mice (Percentage of object/Total area in pancreas,%)				0.2% Tre mice (Percentage of object/Total area in pancreas,%)				GF mice (Percentage of object/Total area in pancreas,%)
	Groups	Bcl-2	Beclin1	Caspase-3	Groups	Bcl-2	Beclin1	Caspase-3	Groups	Bcl-2	Beclin1	Caspase-3
	BC	0.060272	0.13725	1.42	BC	0.0272	0.101636	1.37057	SAP	2.0464	0.62445	2.0788
		0.041828	0.28675	1.68229		0.036	0.121818	1.53714		1.50015	0.455	2.49108
		0.0468	0.25	1.30009		0.068	0.27273	1.42857		1.507	0.763335	2.04503
		0.0544	0.2165	0.731429		0.0344	0.247273	1.30286		1.51805	0.637016	2.06
		0.04996	0.167125	1.33571		0.06	0.273	0.97143		2.1885	0.398335	2.43275
		0.03916	0.2655	0.84		0.056	0.364	1.05		1.9	0.65	2.44
		0.09716	0.13725	1.26857		0.036	0.254545	1.49714		1.675	0.654166	2.53
		0.04496	0.168925	0.757429		0.0696	0.30909	1.42857		1.40795	0.639817	1.731
		0.0752	0.27125	1.21971		0.052	0.45455	1.5714		1.31865	0.66665	1.9181
		0.08992	0.1901	0.921714		0.0392	0.182	0.8571		1.5625	0.451665	2.4
		0.07244	0.1731	1.67143		0.0844	0.498182	1.42857		1.621	0.411665	1.772
		0.02144	0.195	1.59		0.0344	0.269091	0.71429		1.87	0.56665	1.931
	ATBx	0.048	0.229	0.826		0.056	0.30909	0.8714	Tre+SAP	1.52435	0.65784	2.03918
		0.033856	0.2425	1.24657		0.064	0.18182	1.429		1.8315	0.66648	1.89854
		0.09512	0.290125	1.684		0.03152	0.286909	1.48571		1.6405	0.51209	2.68114
		0.0446	0.1865	1.6857		0.0556	0.168909	0.5714		1.79	0.4914	2.56243
		0.07244	0.17075	1.57343		0.04	0.127273	1.30571		1.555	0.3806	2.04744
		0.07104	0.15625	0.88572	0.2% Tre	0.0312	0.107564	0.914		1.9	0.50122	2.6111
		0.03248	0.148	1.66572		0.0656	0.267273	0.80857		2.06111	0.6447	2.77778
		0.08996	0.1725	0.789143		0.042312	0.200909	1.39829		1.255	0.8534	2.37427
		0.08076	0.18175	0.79714		0.06	0.26545	1.09714		1.8335	0.61936	2.25
		0.04372	0.1775	0.8286		0.00444	0.546	0.714		1.95	0.46	2.03187
		0.0176	0.16975	0.57429		0.03504	0.240909	1.67429		1.38375	0.4918	2.02251
		0.029788	0.1325	1.22		0.048	0.125818	0.884		1.45445	0.501492	1.03918
	SAP	1.8	0.329133	2.54933		0.02676	0.17091	1.43	BC-FMT+SAP	2.0376	0.65874	3.18757
		1.45	0.3346	3.228		0.0676	0.14	0.77714		2.05432	0.7244	2.94298
		2	0.329067	2.47853		0.0812	0.496545	1.5914		2.0706	0.74	1.92485
		2.235	0.385333	2.244		0.03896	0.114164	1.43143		1.74459	0.6768	3.16424
		1.293	0.358	2.02307		0.0778	0.56909	0.736286		2.09618	0.4842	2.46857
		1.9	0.247667	2.21267		0.076	0.135073	1.61771		1.80412	0.82	2.38158
		1.75	0.349333	2.31333		0.05676	0.32182	1.6286		1.49412	0.5718	2.94298
		2.485	0.299333	2.97547		0.03012	0.314727	0.8		1.59547	0.778	2.86184
		1.805	0.360333	2.47333		0.0496	0.505273	1.414		1.86941	0.779	2.44664
		1.535	0.498733	3.53867		0.0778	0.105691	0.52022		1.73288	0.5228	2.30483
		1.765	0.486833	2.136	SAP	1.34064	0.613455	2.124		1.95035	0.8136	2.8154
		1.6	0.403333	2.94253		1.40896	0.97818	1.86736		1.70788	0.8758	2.11087
	ATBx+SAP	1.305	0.3894	1.434		1.2512	0.613091	1.986	Tre-FMT+SAP	2.04697	0.65155	2.01121
		2.1	0.2769	2.85467		1.22588	0.412	1.50928		1.31412	0.632234	2.16462
		2.455	0.233333	2.35187		1.8344	0.48	2.38768		2.536	0.682167	2.13857
		2.85	0.287833	1.97067		1.41352	0.6286	2.9752		1.90706	0.548167	2.326
		2.2	0.311633	2.59587		1.486	0.66	2.096		1.68524	0.46	2.502
		2.75	0.473167	2.38		2.10388	0.6996	2.73056		1.88294	0.8235	2.2991
		1.6095	0.289333	2.58893		1.75044	0.362	1.3368		1.9882	0.557017	2.62
		2.275	0.428333	1.89733		1.93563	0.824	1.6064		1.61471	0.83335	1.93421
		2.83	0.3365	1.5733		1.39012	0.721	2.632		2.24059	0.62065	2.38304
		1.58	0.263667	2.21867		1.04701	0.642	2.01851		2.4706	0.711821	2.01037
		1.67	0.265	2.56693		1.03639	0.8996	2.15706		1.75294	0.633034	2.25161
		1.6	0.362	1.992		1.05104	0.7362	2.11768		2.04712	0.6685	3.10137
						1.71628	0.6924	2
						0.843012	0.921	2.02016
						2.04301	0.42	2.69104
					0.2% Tre+SAP	2.14984	0.64	2.14008
						1.03793	0.614	2.15856
						2.04506	0.86	2.01782
						2.31572	0.727	1.19565
						1.8352	0.698	1.504
						2.3726	0.9	2.0056
						1.54876	0.7536	1.2672
						1.94	0.457	2.22768
						0.9864	0.0619	2.38288
						1.30864	0.5382	2.02022
						2.02502	0.39	1.72032
						1.6848	0.412	1.59904
						0.894	0.3057	1.06768
						1.7864	0.819	2.4288
						1.34864	0.5382	1.02022
						1.03902	0.339	2.0156
						1.848	0.501012	1.1759
Figure 8e	Immunofluorescencel quantitative data (mean of 10 high magnification fields of view/mouse)
	ATBx mice (log2(red/blue fluorescence ratio))				0.2% Tre mice (log2(red/blue fluorescence ratio))				GF mice (log2(red/blue fluorescence ratio))
		Bcl-2	Beclin1	Caspase-3		Bcl-2	Beclin1	Caspase-3		Bcl-2	Beclin1	Caspase-3
	BC	-8.3678	-9.78023	-5.68631	BC	-8.54786	-9.94237	-8.07603	SAP	-6.28906	-8.65022	-4.48552							-6.28906	-8.65022	-4.48552
		-8.8396	-9.60205	-5.89343		-8.37315	-9.79995	-8.62258		-6.0675	-8.90159	-4.3215							-6.0675	-8.90159	-4.3215
		-8.35849	-9.35698	-5.05848		-8.78436	-10.0747	-9.45121		-6.81449	-9.15623	-4.83362							-6.81449	-9.15623	-4.83362
		-8.61869	-9.68305	-5.1942		-8.18338	-9.64701	-8.36715		-5.96289	-8.51143	-4.27076							-5.96289	-8.51143	-4.27076
		-8.64409	-10.5409	-6.22625		-8.88444	-10.2926	-7.04522		-6.72811	-9.21761	-4.88321							-6.72811	-9.21761	-4.88321
		-8.20382	-8.78595	-5.51688		-8.60964	-10.0855	-7.96578		-6.84569	-8.57072	-4.84934							-6.84569	-8.57072	-4.84934
		-8.98642	-9.50898	-5.69761		-8.727	-9.63862	-7.65212		-6.80857	-8.75893	-4.73025							-6.80857	-8.75893	-4.73025
		-8.17936	-10.5027	-5.18053		-8.07982	-10.233	-9.45121		-6.23707	-8.48225	-4.61546							-6.23707	-8.48225	-4.61546
		-8.05812	-9.61954	-5.49348		-8.15021	-9.64911	-9.05067		-6.74249	-9.09921	-4.97188							-6.74249	-9.09921	-4.97188
		-8.43013	-10.1162	-5.70146		-8.20365	-9.83067	-8.80967		-6.2109	-8.64945	-4.45403							-6.2109	-8.64945	-4.45403
		-8.06878	-9.17418	-5.46298		-8.45786	-9.38257	-8.86625		-6.82211	-8.65409	-4.74817							-6.82211	-8.65409	-4.74817
		-7.89046	-9.83485	-5.2709		-8.22421	-9.8694	-9.18817		-6.23914	-8.67222	-4.41519							-6.23914	-8.67222	-4.41519
	ATBx	-8.1667	-9.6683	-5.77517		-8.13391	-9.92187	-9.05067	Tre+SAP	-6.40029	-8.29912	-4.25333							-6.40029	-8.29912	-4.25333
		-8.20637	-9.65254	-5.47613		-8.35037	-9.46174	-8.83391		-6.7982	-8.67371	-4.46387							-6.7982	-8.67371	-4.46387
		-7.98349	-9.03884	-5.21947		-8.30952	-9.60187	-8.65212		-5.89442	-8.8449	-4.42958							-5.89442	-8.8449	-4.42958
		-8.18086	-9.71907	-5.63892		-8.13553	-9.20954	-8.46717		-6.00007	-8.73092	-4.41766							-6.00007	-8.73092	-4.41766
		-9.17969	-9.86716	-5.98994		-8.36171	-9.79295	-9.58095		-6.08371	-8.72187	-4.48827							-6.08371	-8.72187	-4.48827
		-8.07421	-9.42353	-5.38771	0.2% Tre	-8.32424	-9.86059	-8.88737		-6.45975	-8.7124	-4.57691							-6.45975	-8.7124	-4.57691
		-8.23252	-9.89815	-5.46334		-8.55653	-9.62406	-8.9943		-6.5358	-8.61891	-4.60437							-6.5358	-8.61891	-4.60437
		-9.04009	-9.8188	-5.80459		-7.88472	-9.70166	-8.70378		-6.45808	-8.92622	-4.62415							-6.45808	-8.92622	-4.62415
		-8.0369	-9.60767	-5.51972		-8.82435	-9.67118	-8.86164		-6.35021	-8.61077	-4.37079							-6.35021	-8.61077	-4.37079
		-8.68056	-9.32632	-5.56096		-8.6763	-10.0239	-9.05067		-6.24473	-8.56219	-4.57639							-6.24473	-8.56219	-4.57639
		-7.90366	-9.86851	-5.6749		-8.15678	-9.65439	-8.44603		-6.47712	-8.57226	-4.70369							-6.47712	-8.57226	-4.70369
		-8.39105	-9.69885	-5.62807		-8.34061	-9.79481	-8.55126		-6.40029	-8.50551	-4.45973							-6.40029	-8.50551	-4.45973
	SAP	-6.01221	-9.59692	-4.24934		-8.54571	-9.98453	-8.83542	BC-FMT+SAP	-5.7364	-8.30732	-4.31111							-5.7364	-8.30732	-4.31111
		-6.13512	-8.73558	-4.60402		-8.84969	-9.81004	-8.65677		-6.72855	-8.23044	-4.20244							-6.72855	-8.23044	-4.20244
		-6.07969	-8.77002	-4.42973		-9.1082	-9.38415	-8.74811		-5.30766	-8.69197	-4.349							-5.30766	-8.69197	-4.349
		-6.4747	-9.07566	-4.70896		-8.00379	-9.77468	-8.68398		-5.92805	-8.38912	-3.74741							-5.92805	-8.38912	-3.74741
		-6.61096	-8.59841	-4.54187		-9.13553	-9.88593	-9.16978		-6.08945	-8.05459	-4.333							-6.08945	-8.05459	-4.333
		-6.36567	-8.35808	-4.14076		-8.16836	-9.53205	-9.27183		-5.39194	-8.67938	-3.87745							-5.39194	-8.67938	-3.87745
		-6.25062	-8.64771	-4.30045		-8.60536	-10.0671	-9.03502		-6.72855	-8.43272	-4.18597							-6.72855	-8.43272	-4.18597
		-5.66166	-8.64424	-4.09579		-8.37506	-9.57102	-8.58095		-5.74713	-8.5292	-4.06983							-5.74713	-8.5292	-4.06983
		-6.32501	-8.13377	-4.35683		-8.16008	-9.37576	-8.86433		-6.11115	-7.83248	-4.36011							-6.11115	-7.83248	-4.36011
		-5.84587	-8.33942	-4.19667		-8.04816	-9.88593	-8.95		-6.26	-8.34792	-3.77027							-6.26	-8.34792	-3.77027
		-5.49746	-9.06403	-4.21719	SAP	-5.55707	-9.27563	-4.87561		-5.53687	-8.38873	-4.31178							-5.53687	-8.38873	-4.31178
		-5.68592	-8.70075	-4.06468		-5.74286	-9.83115	-4.6119		-10.1669	-8.38873	-3.82035							-10.1669	-8.38873	-3.82035
	ATBx+SAP	-6.12381	-9.04435	-4.74449		-5.69209	-9.27596	-5.31502	Tre-FMT+SAP	-5.55888	-8.36599	-4.4121							-5.55888	-8.36599	-4.4121
		-5.7527	-9.14285	-4.25401		-6.05	-8.84729	-5.4683		-5.8245	-8.5627	-4.23403							-5.8245	-8.5627	-4.23403
		-5.41005	-8.68285	-4.59684		-6.17118	-9.53496	-4.70486		-5.38946	-8.21546	-4.22162							-5.38946	-8.21546	-4.22162
		-6.06172	-9.05633	-4.33745		-6.68009	-8.57149	-4.5959		-5.95803	-7.70385	-4.349							-5.95803	-7.70385	-4.349
		-5.96952	-8.88422	-4.6802		-6.51161	-9.43013	-4.3629		-5.96065	-8.48966	-4.69812							-5.96065	-8.48966	-4.69812
		-5.68929	-8.516	-4.27718		-5.85262	-9.20059	-4.35698		-6.26632	-8.72415	-4.08732							-6.26632	-8.72415	-4.08732
		-5.72628	-8.5932	-4.79206		-6.22507	-9.01256	-4.67876		-5.58062	-8.86795	-4.35229							-5.58062	-8.86795	-4.35229
		-5.5131	-9.45145	-4.36068		-5.96003	-8.83327	-4.45394		-6.74204	-8.77254	-4.15465							-6.74204	-8.77254	-4.15465
		-6.52519	-9.51688	-4.84353		-5.41962	-9.18254	-4.67994		-5.84618	-8.69476	-4.55959							-5.84618	-8.69476	-4.55959
		-5.49416	-8.60758	-4.52019		-5.75552	-9.25033	-4.41095		-5.61752	-8.72435	-4.32057							-5.61752	-8.72435	-4.32057
		-5.99591	-8.91964	-4.59876		-5.99258	-9.04009	-4.78039		-6.32007	-7.98004	-4.39504							-6.32007	-7.98004	-4.39504
		-5.50688	-8.37124	-4.29166		-6.40899	-9.16985	-4.29211		-5.63398	-8.74113	-4.40759							-5.63398	-8.74113	-4.40759
						-6.11139	-8.97128	-4.5863
						-5.63213	-9.02393	-4.35072
						-5.88595	-9.43771	-4.53925
					0.2% Tre+SAP	-6.15761	-9.34623	-4.32644
						-5.97883	-9.27514	-4.72059
						-5.81016	-9.2346	-5.31847
						-5.6756	-9.17752	-4.98521
						-5.97026	-8.98774	-5.3102
						-5.63982	-8.80293	-4.74623
						-5.94189	-9.15546	-4.84162
						-5.48831	-9.07281	-4.54153
						-6.17618	-9.27068	-4.64877
						-5.62779	-9.34454	-5.01793
						-5.86118	-9.25297	-5.32101
						-5.6508	-9.46804	-4.76227
						-5.59584	-8.92524	-4.6826
						-5.94005	-9.10264	-4.72303
						-5.62779	-9.34454	-5.3298
						-5.28753	-9.54463	-5.10701
						-5.82907	-9.94857	-4.61359
Figure 8f
	Cat.P0078，Beyotime, Protein Ladder			Tubulin ~50KD		BCl-2 ~26KD		Beclin-1 ~52-60KD		Pro-caspase-3 ~32KD		Cleaved caspase-3 ~17KD ~19KD
			ATBx mice
			0.2% Tre mice
			GF mice

## Sheet: Supplementary Figure 1
Supplementary Fig. 1a
Supplementary Fig. 1b	Alpha diversity of gut microbiota after ATBx treatment
	id	Category1	simpson	shannon_entropy	Kruskal-Wallis test in simpson
	#q2:types	categorical	numeric	numeric	Group 1	Group 2	H	p-value	q-value
	Control1	Control	0.824607	3.46606	ATBx (n=12)	ATBx+SAP (n=12)	6.16333	0.0130425	0.015651
	Control2	Control	0.843179	3.26299	ATBx (n=12)	Control (n=11)	16.5	4.87e-05	0.000163693
	Control3	Control	0.864791	3.65745	ATBx (n=12)	SAP (n=10)	15.6522	7.61e-05	0.000163693
	Control4	Control	0.813424	3.18147	ATBx+SAP (n=12)	Control (n=11)	15.5152	8.18e-05	0.000163693
	Control5	Control	0.847227	3.50481	ATBx+SAP (n=12)	SAP (n=10)	13.1522	0.000287186	0.000430779
	Control6	Control	0.905845	4.14488	Control (n=11)	SAP (n=10)	0.0198347	0.888	0.888
	Control7	Control	0.863648	3.92256
	Control8	Control	0.871585	3.74632	Kruskal-Wallis test in shannon
	Control9	Control	0.897576	4.11349	Group 1	Group 2	H	p-value	q-value
	Control10	Control	0.840919	3.68713	ATBx (n=12)	ATBx+SAP (n=12)	5.60333	0.0179263	0.0358527
	Control11	Control	0.916291	4.24419	ATBx (n=12)	Control (n=11)	16.5	4.86501e-05	0.0002919
	ATBx1	ATBx	0.12498	0.621404	ATBx (n=12)	SAP (n=10)	14.6261	0.000131087	0.000393262
	ATBx2	ATBx	0.106987	0.507228	ATBx+SAP (n=12)	Control (n=11)	3.40909	0.0648382	0.0778058
	ATBx3	ATBx	0.0852113	0.500388	ATBx+SAP (n=12)	SAP (n=10)	4.17826	0.0409457	0.0614185
	ATBx4	ATBx	0.291745	1.5876	Control (n=11)	SAP (n=10)	1.26942	0.259875	0.259875
	ATBx5	ATBx	0.0599042	0.387084
	ATBx6	ATBx	0.133566	0.878662
	ATBx7	ATBx	0.447314	2.06148
	ATBx8	ATBx	0.327185	1.57983
	ATBx9	ATBx	0.308033	1.43793
	ATBx10	ATBx	0.589942	2.95674
	ATBx11	ATBx	0.474622	2.48305
	ATBx12	ATBx	0.60454	2.91224
	SAP1	SAP	0.707703	2.4995
	SAP2	SAP	0.842789	3.9897
	SAP3	SAP	0.865296	3.84919
	SAP4	SAP	0.79752	3.31058
	SAP5	SAP	0.91077	4.31294
	SAP6	SAP	0.867434	4.11211
	SAP7	SAP	0.925959	4.63466
	SAP8	SAP	0.894794	4.22959
	SAP9	SAP	0.807633	3.78883
	SAP10	SAP	0.865943	3.80173
	ATBxSAP1	ATBx+SAP	0.422602	2.18324
	ATBxSAP2	ATBx+SAP	0.264145	1.1441
	ATBxSAP3	ATBx+SAP	0.126754	0.713563
	ATBxSAP4	ATBx+SAP	0.686548	3.9109
	ATBxSAP5	ATBx+SAP	0.6744	4.00367
	ATBxSAP6	ATBx+SAP	0.833176	4.79548
	ATBxSAP7	ATBx+SAP	0.4455	1.79663
	ATBxSAP8	ATBx+SAP	0.563356	2.40127
	ATBxSAP9	ATBx+SAP	0.71602	3.35287
	ATBxSAP10	ATBx+SAP	0.517487	2.16233
	ATBxSAP11	ATBx+SAP	0.796579	4.02407
	ATBxSAP12	ATBx+SAP	0.551347	2.45074
Supplementary Fig. 1c	Beta diversity of gut microbiota after ATBx treatment
		SubjectID1	SubjectID2	Group1	Group2	Distance	Group 1	Group 2	Sample size	Permutations	pseudo-F	p-value	q-value
	0	ATBx2	ATBx1	ATBx	ATBx	0.00680962	ATBx	ATBxSAP	24	999	4.67003	0.012	0.012
	1	ATBx3	ATBx1	ATBx	ATBx	0.0126187	ATBx	Control	23	999	105.752	0.001	0.0012
	2	ATBx3	ATBx2	ATBx	ATBx	0.0106848	ATBx	SAP	22	999	55.6263	0.001	0.0012
	3	ATBx4	ATBx1	ATBx	ATBx	0.0484533	ATBxSAP	Control	23	999	52.3912	0.001	0.0012
	4	ATBx4	ATBx2	ATBx	ATBx	0.0527013	ATBxSAP	SAP	22	999	28.1251	0.001	0.0012
	5	ATBx4	ATBx3	ATBx	ATBx	0.0504669	Control	SAP	21	999	9.54483	0.001	0.0012
	6	ATBx5	ATBx1	ATBx	ATBx	0.0169145
	7	ATBx5	ATBx2	ATBx	ATBx	0.015158
	8	ATBx5	ATBx3	ATBx	ATBx	0.0074269
	9	ATBx5	ATBx4	ATBx	ATBx	0.0553255
	10	ATBx6	ATBx1	ATBx	ATBx	0.0205683
	11	ATBx6	ATBx2	ATBx	ATBx	0.0204527
	12	ATBx6	ATBx3	ATBx	ATBx	0.0165353
	13	ATBx6	ATBx4	ATBx	ATBx	0.0550218
	14	ATBx6	ATBx5	ATBx	ATBx	0.0162413
	15	ATBx7	ATBx1	ATBx	ATBx	0.0850851
	16	ATBx7	ATBx2	ATBx	ATBx	0.0903928
	17	ATBx7	ATBx3	ATBx	ATBx	0.0943997
	18	ATBx7	ATBx4	ATBx	ATBx	0.0635039
	19	ATBx7	ATBx5	ATBx	ATBx	0.0994156
	20	ATBx7	ATBx6	ATBx	ATBx	0.0981113
	21	ATBx8	ATBx1	ATBx	ATBx	0.049573
	22	ATBx8	ATBx2	ATBx	ATBx	0.0540389
	23	ATBx8	ATBx3	ATBx	ATBx	0.0573809
	24	ATBx8	ATBx4	ATBx	ATBx	0.037593
	25	ATBx8	ATBx5	ATBx	ATBx	0.0626178
	26	ATBx8	ATBx6	ATBx	ATBx	0.0621697
	27	ATBx8	ATBx7	ATBx	ATBx	0.0478834
	28	ATBx9	ATBx1	ATBx	ATBx	0.0468331
	29	ATBx9	ATBx2	ATBx	ATBx	0.0516434
	30	ATBx9	ATBx3	ATBx	ATBx	0.0561463
	31	ATBx9	ATBx4	ATBx	ATBx	0.031802
	32	ATBx9	ATBx5	ATBx	ATBx	0.0612655
	33	ATBx9	ATBx6	ATBx	ATBx	0.0628046
	34	ATBx9	ATBx7	ATBx	ATBx	0.0483041
	35	ATBx9	ATBx8	ATBx	ATBx	0.0283442
	36	ATBx10	ATBx1	ATBx	ATBx	0.133875
	37	ATBx10	ATBx2	ATBx	ATBx	0.138992
	38	ATBx10	ATBx3	ATBx	ATBx	0.142784
	39	ATBx10	ATBx4	ATBx	ATBx	0.109647
	40	ATBx10	ATBx5	ATBx	ATBx	0.147705
	41	ATBx10	ATBx6	ATBx	ATBx	0.144671
	42	ATBx10	ATBx7	ATBx	ATBx	0.0784361
	43	ATBx10	ATBx8	ATBx	ATBx	0.10332
	44	ATBx10	ATBx9	ATBx	ATBx	0.105177
	45	ATBx11	ATBx1	ATBx	ATBx	0.0994966
	46	ATBx11	ATBx2	ATBx	ATBx	0.103166
	47	ATBx11	ATBx3	ATBx	ATBx	0.103393
	48	ATBx11	ATBx4	ATBx	ATBx	0.0647788
	49	ATBx11	ATBx5	ATBx	ATBx	0.107893
	50	ATBx11	ATBx6	ATBx	ATBx	0.0951631
	51	ATBx11	ATBx7	ATBx	ATBx	0.0576831
	52	ATBx11	ATBx8	ATBx	ATBx	0.0759652
	53	ATBx11	ATBx9	ATBx	ATBx	0.0658186
	54	ATBx11	ATBx10	ATBx	ATBx	0.087252
	55	ATBx12	ATBx1	ATBx	ATBx	0.126892
	56	ATBx12	ATBx2	ATBx	ATBx	0.131888
	57	ATBx12	ATBx3	ATBx	ATBx	0.133682
	58	ATBx12	ATBx4	ATBx	ATBx	0.0948877
	59	ATBx12	ATBx5	ATBx	ATBx	0.138996
	60	ATBx12	ATBx6	ATBx	ATBx	0.13627
	61	ATBx12	ATBx7	ATBx	ATBx	0.0660632
	62	ATBx12	ATBx8	ATBx	ATBx	0.0877672
	63	ATBx12	ATBx9	ATBx	ATBx	0.0912153
	64	ATBx12	ATBx10	ATBx	ATBx	0.0647416
	65	ATBx12	ATBx11	ATBx	ATBx	0.0707482
	66	ATBx1	ATBxSAP1	ATBx	ATBxSAP	0.0770194
	67	ATBx1	ATBxSAP2	ATBx	ATBxSAP	0.0372277
	68	ATBx1	ATBxSAP3	ATBx	ATBxSAP	0.00764256
	69	ATBx1	ATBxSAP4	ATBx	ATBxSAP	0.16941
	70	ATBx1	ATBxSAP5	ATBx	ATBxSAP	0.153255
	71	ATBx1	ATBxSAP6	ATBx	ATBxSAP	0.265135
	72	ATBx1	ATBxSAP7	ATBx	ATBxSAP	0.0846299
	73	ATBx1	ATBxSAP8	ATBx	ATBxSAP	0.117853
	74	ATBx1	ATBxSAP9	ATBx	ATBxSAP	0.18241
	75	ATBx1	ATBxSAP10	ATBx	ATBxSAP	0.101963
	76	ATBx1	ATBxSAP11	ATBx	ATBxSAP	0.20796
	77	ATBx1	ATBxSAP12	ATBx	ATBxSAP	0.104892
	78	ATBx2	ATBxSAP1	ATBx	ATBxSAP	0.0820022
	79	ATBx2	ATBxSAP2	ATBx	ATBxSAP	0.0428858
	80	ATBx2	ATBxSAP3	ATBx	ATBxSAP	0.0105524
	81	ATBx2	ATBxSAP4	ATBx	ATBxSAP	0.174613
	82	ATBx2	ATBxSAP5	ATBx	ATBxSAP	0.158381
	83	ATBx2	ATBxSAP6	ATBx	ATBxSAP	0.270385
	84	ATBx2	ATBxSAP7	ATBx	ATBxSAP	0.0886457
	85	ATBx2	ATBxSAP8	ATBx	ATBxSAP	0.122231
	86	ATBx2	ATBxSAP9	ATBx	ATBxSAP	0.187568
	87	ATBx2	ATBxSAP10	ATBx	ATBxSAP	0.106236
	88	ATBx2	ATBxSAP11	ATBx	ATBxSAP	0.21307
	89	ATBx2	ATBxSAP12	ATBx	ATBxSAP	0.109459
	90	ATBx3	ATBxSAP1	ATBx	ATBxSAP	0.0823033
	91	ATBx3	ATBxSAP2	ATBx	ATBxSAP	0.0465744
	92	ATBx3	ATBxSAP3	ATBx	ATBxSAP	0.0143518
	93	ATBx3	ATBxSAP4	ATBx	ATBxSAP	0.174754
	94	ATBx3	ATBxSAP5	ATBx	ATBxSAP	0.159147
	95	ATBx3	ATBxSAP6	ATBx	ATBxSAP	0.271143
	96	ATBx3	ATBxSAP7	ATBx	ATBxSAP	0.0911416
	97	ATBx3	ATBxSAP8	ATBx	ATBxSAP	0.123076
	98	ATBx3	ATBxSAP9	ATBx	ATBxSAP	0.191318
	99	ATBx3	ATBxSAP10	ATBx	ATBxSAP	0.109012
	100	ATBx3	ATBxSAP11	ATBx	ATBxSAP	0.216392
	101	ATBx3	ATBxSAP12	ATBx	ATBxSAP	0.110965
	102	ATBx4	ATBxSAP1	ATBx	ATBxSAP	0.0546972
	103	ATBx4	ATBxSAP2	ATBx	ATBxSAP	0.0402834
	104	ATBx4	ATBxSAP3	ATBx	ATBxSAP	0.0482822
	105	ATBx4	ATBxSAP4	ATBx	ATBxSAP	0.142569
	106	ATBx4	ATBxSAP5	ATBx	ATBxSAP	0.121244
	107	ATBx4	ATBxSAP6	ATBx	ATBxSAP	0.238791
	108	ATBx4	ATBxSAP7	ATBx	ATBxSAP	0.0698867
	109	ATBx4	ATBxSAP8	ATBx	ATBxSAP	0.0978091
	110	ATBx4	ATBxSAP9	ATBx	ATBxSAP	0.152956
	111	ATBx4	ATBxSAP10	ATBx	ATBxSAP	0.0923575
	112	ATBx4	ATBxSAP11	ATBx	ATBxSAP	0.179878
	113	ATBx4	ATBxSAP12	ATBx	ATBxSAP	0.0904201
	114	ATBx5	ATBxSAP1	ATBx	ATBxSAP	0.0872921
	115	ATBx5	ATBxSAP2	ATBx	ATBxSAP	0.0508815
	116	ATBx5	ATBxSAP3	ATBx	ATBxSAP	0.0167987
	117	ATBx5	ATBxSAP4	ATBx	ATBxSAP	0.178275
	118	ATBx5	ATBxSAP5	ATBx	ATBxSAP	0.164274
	119	ATBx5	ATBxSAP6	ATBx	ATBxSAP	0.275235
	120	ATBx5	ATBxSAP7	ATBx	ATBxSAP	0.0948899
	121	ATBx5	ATBxSAP8	ATBx	ATBxSAP	0.127104
	122	ATBx5	ATBxSAP9	ATBx	ATBxSAP	0.196778
	123	ATBx5	ATBxSAP10	ATBx	ATBxSAP	0.112487
	124	ATBx5	ATBxSAP11	ATBx	ATBxSAP	0.221818
	125	ATBx5	ATBxSAP12	ATBx	ATBxSAP	0.115007
	126	ATBx6	ATBxSAP1	ATBx	ATBxSAP	0.0864746
	127	ATBx6	ATBxSAP2	ATBx	ATBxSAP	0.0522403
	128	ATBx6	ATBxSAP3	ATBx	ATBxSAP	0.0189711
	129	ATBx6	ATBxSAP4	ATBx	ATBxSAP	0.171562
	130	ATBx6	ATBxSAP5	ATBx	ATBxSAP	0.157522
	131	ATBx6	ATBxSAP6	ATBx	ATBxSAP	0.2688
	132	ATBx6	ATBxSAP7	ATBx	ATBxSAP	0.09566
	133	ATBx6	ATBxSAP8	ATBx	ATBxSAP	0.126879
	134	ATBx6	ATBxSAP9	ATBx	ATBxSAP	0.193337
	135	ATBx6	ATBxSAP10	ATBx	ATBxSAP	0.110876
	136	ATBx6	ATBxSAP11	ATBx	ATBxSAP	0.218212
	137	ATBx6	ATBxSAP12	ATBx	ATBxSAP	0.111692
	138	ATBx7	ATBxSAP1	ATBx	ATBxSAP	0.0472032
	139	ATBx7	ATBxSAP2	ATBx	ATBxSAP	0.0600936
	140	ATBx7	ATBxSAP3	ATBx	ATBxSAP	0.0865647
	141	ATBx7	ATBxSAP4	ATBx	ATBxSAP	0.124798
	142	ATBx7	ATBxSAP5	ATBx	ATBxSAP	0.0891271
	143	ATBx7	ATBxSAP6	ATBx	ATBxSAP	0.214786
	144	ATBx7	ATBxSAP7	ATBx	ATBxSAP	0.0514861
	145	ATBx7	ATBxSAP8	ATBx	ATBxSAP	0.0820117
	146	ATBx7	ATBxSAP9	ATBx	ATBxSAP	0.110327
	147	ATBx7	ATBxSAP10	ATBx	ATBxSAP	0.0766946
	148	ATBx7	ATBxSAP11	ATBx	ATBxSAP	0.135888
	149	ATBx7	ATBxSAP12	ATBx	ATBxSAP	0.078553
	150	ATBx8	ATBxSAP1	ATBx	ATBxSAP	0.0480065
	151	ATBx8	ATBxSAP2	ATBx	ATBxSAP	0.0438461
	152	ATBx8	ATBxSAP3	ATBx	ATBxSAP	0.0505174
	153	ATBx8	ATBxSAP4	ATBx	ATBxSAP	0.140351
	154	ATBx8	ATBxSAP5	ATBx	ATBxSAP	0.116073
	155	ATBx8	ATBxSAP6	ATBx	ATBxSAP	0.234607
	156	ATBx8	ATBxSAP7	ATBx	ATBxSAP	0.0580302
	157	ATBx8	ATBxSAP8	ATBx	ATBxSAP	0.0861593
	158	ATBx8	ATBxSAP9	ATBx	ATBxSAP	0.142103
	159	ATBx8	ATBxSAP10	ATBx	ATBxSAP	0.0876246
	160	ATBx8	ATBxSAP11	ATBx	ATBxSAP	0.166855
	161	ATBx8	ATBxSAP12	ATBx	ATBxSAP	0.0793781
	162	ATBx9	ATBxSAP1	ATBx	ATBxSAP	0.0465022
	163	ATBx9	ATBxSAP2	ATBx	ATBxSAP	0.0394731
	164	ATBx9	ATBxSAP3	ATBx	ATBxSAP	0.0501742
	165	ATBx9	ATBxSAP4	ATBx	ATBxSAP	0.145062
	166	ATBx9	ATBxSAP5	ATBx	ATBxSAP	0.113282
	167	ATBx9	ATBxSAP6	ATBx	ATBxSAP	0.238619
	168	ATBx9	ATBxSAP7	ATBx	ATBxSAP	0.0554931
	169	ATBx9	ATBxSAP8	ATBx	ATBxSAP	0.081855
	170	ATBx9	ATBxSAP9	ATBx	ATBxSAP	0.140283
	171	ATBx9	ATBxSAP10	ATBx	ATBxSAP	0.0827517
	172	ATBx9	ATBxSAP11	ATBx	ATBxSAP	0.168363
	173	ATBx9	ATBxSAP12	ATBx	ATBxSAP	0.0767498
	174	ATBx10	ATBxSAP1	ATBx	ATBxSAP	0.0960079
	175	ATBx10	ATBxSAP2	ATBx	ATBxSAP	0.117076
	176	ATBx10	ATBxSAP3	ATBx	ATBxSAP	0.13537
	177	ATBx10	ATBxSAP4	ATBx	ATBxSAP	0.101881
	178	ATBx10	ATBxSAP5	ATBx	ATBxSAP	0.0711157
	179	ATBx10	ATBxSAP6	ATBx	ATBxSAP	0.190575
	180	ATBx10	ATBxSAP7	ATBx	ATBxSAP	0.108874
	181	ATBx10	ATBxSAP8	ATBx	ATBxSAP	0.115598
	182	ATBx10	ATBxSAP9	ATBx	ATBxSAP	0.0847604
	183	ATBx10	ATBxSAP10	ATBx	ATBxSAP	0.113803
	184	ATBx10	ATBxSAP11	ATBx	ATBxSAP	0.0999996
	185	ATBx10	ATBxSAP12	ATBx	ATBxSAP	0.115968
	186	ATBx11	ATBxSAP1	ATBx	ATBxSAP	0.0666819
	187	ATBx11	ATBxSAP2	ATBx	ATBxSAP	0.0900795
	188	ATBx11	ATBxSAP3	ATBx	ATBxSAP	0.0997212
	189	ATBx11	ATBxSAP4	ATBx	ATBxSAP	0.126088
	190	ATBx11	ATBxSAP5	ATBx	ATBxSAP	0.0961925
	191	ATBx11	ATBxSAP6	ATBx	ATBxSAP	0.214983
	192	ATBx11	ATBxSAP7	ATBx	ATBxSAP	0.0784348
	193	ATBx11	ATBxSAP8	ATBx	ATBxSAP	0.0982896
	194	ATBx11	ATBxSAP9	ATBx	ATBxSAP	0.124747
	195	ATBx11	ATBxSAP10	ATBx	ATBxSAP	0.0931259
	196	ATBx11	ATBxSAP11	ATBx	ATBxSAP	0.152776
	197	ATBx11	ATBxSAP12	ATBx	ATBxSAP	0.0903294
	198	ATBx12	ATBxSAP1	ATBx	ATBxSAP	0.0808629
	199	ATBx12	ATBxSAP2	ATBx	ATBxSAP	0.113375
	200	ATBx12	ATBxSAP3	ATBx	ATBxSAP	0.127261
	201	ATBx12	ATBxSAP4	ATBx	ATBxSAP	0.124959
	202	ATBx12	ATBxSAP5	ATBx	ATBxSAP	0.0791157
	203	ATBx12	ATBxSAP6	ATBx	ATBxSAP	0.216475
	204	ATBx12	ATBxSAP7	ATBx	ATBxSAP	0.0848491
	205	ATBx12	ATBxSAP8	ATBx	ATBxSAP	0.0874376
	206	ATBx12	ATBxSAP9	ATBx	ATBxSAP	0.0793256
	207	ATBx12	ATBxSAP10	ATBx	ATBxSAP	0.0999424
	208	ATBx12	ATBxSAP11	ATBx	ATBxSAP	0.107505
	209	ATBx12	ATBxSAP12	ATBx	ATBxSAP	0.0809007
	210	ATBx1	Control1	ATBx	Control	0.371403
	211	ATBx1	Control2	ATBx	Control	0.384354
	212	ATBx1	Control3	ATBx	Control	0.3639
	213	ATBx1	Control4	ATBx	Control	0.38696
	214	ATBx1	Control5	ATBx	Control	0.375069
	215	ATBx1	Control6	ATBx	Control	0.353118
	216	ATBx1	Control7	ATBx	Control	0.392955
	217	ATBx1	Control8	ATBx	Control	0.375918
	218	ATBx1	Control9	ATBx	Control	0.361661
	219	ATBx1	Control10	ATBx	Control	0.37872
	220	ATBx1	Control11	ATBx	Control	0.331998
	221	ATBx2	Control1	ATBx	Control	0.375275
	222	ATBx2	Control2	ATBx	Control	0.3885
	223	ATBx2	Control3	ATBx	Control	0.368052
	224	ATBx2	Control4	ATBx	Control	0.390705
	225	ATBx2	Control5	ATBx	Control	0.379683
	226	ATBx2	Control6	ATBx	Control	0.358164
	227	ATBx2	Control7	ATBx	Control	0.397789
	228	ATBx2	Control8	ATBx	Control	0.380934
	229	ATBx2	Control9	ATBx	Control	0.366863
	230	ATBx2	Control10	ATBx	Control	0.3838
	231	ATBx2	Control11	ATBx	Control	0.337101
	232	ATBx3	Control1	ATBx	Control	0.377586
	233	ATBx3	Control2	ATBx	Control	0.391618
	234	ATBx3	Control3	ATBx	Control	0.373424
	235	ATBx3	Control4	ATBx	Control	0.394317
	236	ATBx3	Control5	ATBx	Control	0.382913
	237	ATBx3	Control6	ATBx	Control	0.359864
	238	ATBx3	Control7	ATBx	Control	0.398544
	239	ATBx3	Control8	ATBx	Control	0.383472
	240	ATBx3	Control9	ATBx	Control	0.36769
	241	ATBx3	Control10	ATBx	Control	0.385676
	242	ATBx3	Control11	ATBx	Control	0.338473
	243	ATBx4	Control1	ATBx	Control	0.349028
	244	ATBx4	Control2	ATBx	Control	0.367891
	245	ATBx4	Control3	ATBx	Control	0.345681
	246	ATBx4	Control4	ATBx	Control	0.369188
	247	ATBx4	Control5	ATBx	Control	0.355049
	248	ATBx4	Control6	ATBx	Control	0.326006
	249	ATBx4	Control7	ATBx	Control	0.364518
	250	ATBx4	Control8	ATBx	Control	0.352873
	251	ATBx4	Control9	ATBx	Control	0.336426
	252	ATBx4	Control10	ATBx	Control	0.354435
	253	ATBx4	Control11	ATBx	Control	0.306082
	254	ATBx5	Control1	ATBx	Control	0.382608
	255	ATBx5	Control2	ATBx	Control	0.396765
	256	ATBx5	Control3	ATBx	Control	0.378151
	257	ATBx5	Control4	ATBx	Control	0.399455
	258	ATBx5	Control5	ATBx	Control	0.387899
	259	ATBx5	Control6	ATBx	Control	0.365017
	260	ATBx5	Control7	ATBx	Control	0.403186
	261	ATBx5	Control8	ATBx	Control	0.388348
	262	ATBx5	Control9	ATBx	Control	0.372837
	263	ATBx5	Control10	ATBx	Control	0.390592
	264	ATBx5	Control11	ATBx	Control	0.343063
	265	ATBx6	Control1	ATBx	Control	0.384601
	266	ATBx6	Control2	ATBx	Control	0.398159
	267	ATBx6	Control3	ATBx	Control	0.378191
	268	ATBx6	Control4	ATBx	Control	0.401135
	269	ATBx6	Control5	ATBx	Control	0.389336
	270	ATBx6	Control6	ATBx	Control	0.363577
	271	ATBx6	Control7	ATBx	Control	0.401014
	272	ATBx6	Control8	ATBx	Control	0.38601
	273	ATBx6	Control9	ATBx	Control	0.370405
	274	ATBx6	Control10	ATBx	Control	0.388364
	275	ATBx6	Control11	ATBx	Control	0.340541
	276	ATBx7	Control1	ATBx	Control	0.323398
	277	ATBx7	Control2	ATBx	Control	0.335014
	278	ATBx7	Control3	ATBx	Control	0.307485
	279	ATBx7	Control4	ATBx	Control	0.332529
	280	ATBx7	Control5	ATBx	Control	0.318541
	281	ATBx7	Control6	ATBx	Control	0.298446
	282	ATBx7	Control7	ATBx	Control	0.331467
	283	ATBx7	Control8	ATBx	Control	0.319652
	284	ATBx7	Control9	ATBx	Control	0.300353
	285	ATBx7	Control10	ATBx	Control	0.324301
	286	ATBx7	Control11	ATBx	Control	0.273248
	287	ATBx8	Control1	ATBx	Control	0.340353
	288	ATBx8	Control2	ATBx	Control	0.353435
	289	ATBx8	Control3	ATBx	Control	0.332014
	290	ATBx8	Control4	ATBx	Control	0.355829
	291	ATBx8	Control5	ATBx	Control	0.34254
	292	ATBx8	Control6	ATBx	Control	0.318991
	293	ATBx8	Control7	ATBx	Control	0.357047
	294	ATBx8	Control8	ATBx	Control	0.339528
	295	ATBx8	Control9	ATBx	Control	0.321296
	296	ATBx8	Control10	ATBx	Control	0.342893
	297	ATBx8	Control11	ATBx	Control	0.290773
	298	ATBx9	Control1	ATBx	Control	0.340557
	299	ATBx9	Control2	ATBx	Control	0.355448
	300	ATBx9	Control3	ATBx	Control	0.332298
	301	ATBx9	Control4	ATBx	Control	0.354915
	302	ATBx9	Control5	ATBx	Control	0.342144
	303	ATBx9	Control6	ATBx	Control	0.321562
	304	ATBx9	Control7	ATBx	Control	0.362437
	305	ATBx9	Control8	ATBx	Control	0.345914
	306	ATBx9	Control9	ATBx	Control	0.331969
	307	ATBx9	Control10	ATBx	Control	0.349029
	308	ATBx9	Control11	ATBx	Control	0.301739
	309	ATBx10	Control1	ATBx	Control	0.298266
	310	ATBx10	Control2	ATBx	Control	0.30516
	311	ATBx10	Control3	ATBx	Control	0.290319
	312	ATBx10	Control4	ATBx	Control	0.306787
	313	ATBx10	Control5	ATBx	Control	0.295627
	314	ATBx10	Control6	ATBx	Control	0.267887
	315	ATBx10	Control7	ATBx	Control	0.305569
	316	ATBx10	Control8	ATBx	Control	0.294492
	317	ATBx10	Control9	ATBx	Control	0.273355
	318	ATBx10	Control10	ATBx	Control	0.295208
	319	ATBx10	Control11	ATBx	Control	0.239544
	320	ATBx11	Control1	ATBx	Control	0.328631
	321	ATBx11	Control2	ATBx	Control	0.349005
	322	ATBx11	Control3	ATBx	Control	0.328339
	323	ATBx11	Control4	ATBx	Control	0.350335
	324	ATBx11	Control5	ATBx	Control	0.336259
	325	ATBx11	Control6	ATBx	Control	0.306846
	326	ATBx11	Control7	ATBx	Control	0.348653
	327	ATBx11	Control8	ATBx	Control	0.333234
	328	ATBx11	Control9	ATBx	Control	0.319688
	329	ATBx11	Control10	ATBx	Control	0.335689
	330	ATBx11	Control11	ATBx	Control	0.287094
	331	ATBx12	Control1	ATBx	Control	0.293249
	332	ATBx12	Control2	ATBx	Control	0.308193
	333	ATBx12	Control3	ATBx	Control	0.286929
	334	ATBx12	Control4	ATBx	Control	0.309701
	335	ATBx12	Control5	ATBx	Control	0.299182
	336	ATBx12	Control6	ATBx	Control	0.272377
	337	ATBx12	Control7	ATBx	Control	0.323884
	338	ATBx12	Control8	ATBx	Control	0.295996
	339	ATBx12	Control9	ATBx	Control	0.289149
	340	ATBx12	Control10	ATBx	Control	0.301189
	341	ATBx12	Control11	ATBx	Control	0.245227
	342	ATBx1	SAP1	ATBx	SAP	0.360801
	343	ATBx1	SAP2	ATBx	SAP	0.338615
	344	ATBx1	SAP3	ATBx	SAP	0.320841
	345	ATBx1	SAP4	ATBx	SAP	0.329434
	346	ATBx1	SAP5	ATBx	SAP	0.339776
	347	ATBx1	SAP6	ATBx	SAP	0.338673
	348	ATBx1	SAP7	ATBx	SAP	0.336289
	349	ATBx1	SAP8	ATBx	SAP	0.290734
	350	ATBx1	SAP9	ATBx	SAP	0.322295
	351	ATBx1	SAP10	ATBx	SAP	0.355203
	352	ATBx2	SAP1	ATBx	SAP	0.365041
	353	ATBx2	SAP2	ATBx	SAP	0.343573
	354	ATBx2	SAP3	ATBx	SAP	0.325532
	355	ATBx2	SAP4	ATBx	SAP	0.334179
	356	ATBx2	SAP5	ATBx	SAP	0.345076
	357	ATBx2	SAP6	ATBx	SAP	0.343837
	358	ATBx2	SAP7	ATBx	SAP	0.3415
	359	ATBx2	SAP8	ATBx	SAP	0.295572
	360	ATBx2	SAP9	ATBx	SAP	0.327308
	361	ATBx2	SAP10	ATBx	SAP	0.359911
	362	ATBx3	SAP1	ATBx	SAP	0.370171
	363	ATBx3	SAP2	ATBx	SAP	0.347344
	364	ATBx3	SAP3	ATBx	SAP	0.327738
	365	ATBx3	SAP4	ATBx	SAP	0.339213
	366	ATBx3	SAP5	ATBx	SAP	0.348786
	367	ATBx3	SAP6	ATBx	SAP	0.347652
	368	ATBx3	SAP7	ATBx	SAP	0.3453
	369	ATBx3	SAP8	ATBx	SAP	0.29711
	370	ATBx3	SAP9	ATBx	SAP	0.331387
	371	ATBx3	SAP10	ATBx	SAP	0.361205
	372	ATBx4	SAP1	ATBx	SAP	0.348775
	373	ATBx4	SAP2	ATBx	SAP	0.30034
	374	ATBx4	SAP3	ATBx	SAP	0.296759
	375	ATBx4	SAP4	ATBx	SAP	0.313233
	376	ATBx4	SAP5	ATBx	SAP	0.314658
	377	ATBx4	SAP6	ATBx	SAP	0.310824
	378	ATBx4	SAP7	ATBx	SAP	0.308962
	379	ATBx4	SAP8	ATBx	SAP	0.263843
	380	ATBx4	SAP9	ATBx	SAP	0.300788
	381	ATBx4	SAP10	ATBx	SAP	0.332003
	382	ATBx5	SAP1	ATBx	SAP	0.375203
	383	ATBx5	SAP2	ATBx	SAP	0.352096
	384	ATBx5	SAP3	ATBx	SAP	0.332618
	385	ATBx5	SAP4	ATBx	SAP	0.343979
	386	ATBx5	SAP5	ATBx	SAP	0.354212
	387	ATBx5	SAP6	ATBx	SAP	0.3532
	388	ATBx5	SAP7	ATBx	SAP	0.350719
	389	ATBx5	SAP8	ATBx	SAP	0.302492
	390	ATBx5	SAP9	ATBx	SAP	0.336388
	391	ATBx5	SAP10	ATBx	SAP	0.366562
	392	ATBx6	SAP1	ATBx	SAP	0.377751
	393	ATBx6	SAP2	ATBx	SAP	0.351641
	394	ATBx6	SAP3	ATBx	SAP	0.334082
	395	ATBx6	SAP4	ATBx	SAP	0.34388
	396	ATBx6	SAP5	ATBx	SAP	0.351387
	397	ATBx6	SAP6	ATBx	SAP	0.3499
	398	ATBx6	SAP7	ATBx	SAP	0.347213
	399	ATBx6	SAP8	ATBx	SAP	0.298162
	400	ATBx6	SAP9	ATBx	SAP	0.331562
	401	ATBx6	SAP10	ATBx	SAP	0.363525
	402	ATBx7	SAP1	ATBx	SAP	0.320926
	403	ATBx7	SAP2	ATBx	SAP	0.283045
	404	ATBx7	SAP3	ATBx	SAP	0.272038
	405	ATBx7	SAP4	ATBx	SAP	0.272389
	406	ATBx7	SAP5	ATBx	SAP	0.267641
	407	ATBx7	SAP6	ATBx	SAP	0.267682
	408	ATBx7	SAP7	ATBx	SAP	0.263132
	409	ATBx7	SAP8	ATBx	SAP	0.232694
	410	ATBx7	SAP9	ATBx	SAP	0.253693
	411	ATBx7	SAP10	ATBx	SAP	0.298314
	412	ATBx8	SAP1	ATBx	SAP	0.340879
	413	ATBx8	SAP2	ATBx	SAP	0.304197
	414	ATBx8	SAP3	ATBx	SAP	0.287939
	415	ATBx8	SAP4	ATBx	SAP	0.300185
	416	ATBx8	SAP5	ATBx	SAP	0.298809
	417	ATBx8	SAP6	ATBx	SAP	0.301341
	418	ATBx8	SAP7	ATBx	SAP	0.298629
	419	ATBx8	SAP8	ATBx	SAP	0.254798
	420	ATBx8	SAP9	ATBx	SAP	0.288913
	421	ATBx8	SAP10	ATBx	SAP	0.324908
	422	ATBx9	SAP1	ATBx	SAP	0.336288
	423	ATBx9	SAP2	ATBx	SAP	0.302542
	424	ATBx9	SAP3	ATBx	SAP	0.289147
	425	ATBx9	SAP4	ATBx	SAP	0.301033
	426	ATBx9	SAP5	ATBx	SAP	0.306226
	427	ATBx9	SAP6	ATBx	SAP	0.305574
	428	ATBx9	SAP7	ATBx	SAP	0.301465
	429	ATBx9	SAP8	ATBx	SAP	0.256742
	430	ATBx9	SAP9	ATBx	SAP	0.288478
	431	ATBx9	SAP10	ATBx	SAP	0.324949
	432	ATBx10	SAP1	ATBx	SAP	0.330032
	433	ATBx10	SAP2	ATBx	SAP	0.253741
	434	ATBx10	SAP3	ATBx	SAP	0.247348
	435	ATBx10	SAP4	ATBx	SAP	0.267996
	436	ATBx10	SAP5	ATBx	SAP	0.241571
	437	ATBx10	SAP6	ATBx	SAP	0.241676
	438	ATBx10	SAP7	ATBx	SAP	0.232862
	439	ATBx10	SAP8	ATBx	SAP	0.220425
	440	ATBx10	SAP9	ATBx	SAP	0.25561
	441	ATBx10	SAP10	ATBx	SAP	0.27743
	442	ATBx11	SAP1	ATBx	SAP	0.337802
	443	ATBx11	SAP2	ATBx	SAP	0.283578
	444	ATBx11	SAP3	ATBx	SAP	0.275694
	445	ATBx11	SAP4	ATBx	SAP	0.299498
	446	ATBx11	SAP5	ATBx	SAP	0.296293
	447	ATBx11	SAP6	ATBx	SAP	0.290479
	448	ATBx11	SAP7	ATBx	SAP	0.289657
	449	ATBx11	SAP8	ATBx	SAP	0.252158
	450	ATBx11	SAP9	ATBx	SAP	0.284253
	451	ATBx11	SAP10	ATBx	SAP	0.312223
	452	ATBx12	SAP1	ATBx	SAP	0.334917
	453	ATBx12	SAP2	ATBx	SAP	0.26064
	454	ATBx12	SAP3	ATBx	SAP	0.240682
	455	ATBx12	SAP4	ATBx	SAP	0.278862
	456	ATBx12	SAP5	ATBx	SAP	0.254391
	457	ATBx12	SAP6	ATBx	SAP	0.255067
	458	ATBx12	SAP7	ATBx	SAP	0.246297
	459	ATBx12	SAP8	ATBx	SAP	0.228594
	460	ATBx12	SAP9	ATBx	SAP	0.265481
	461	ATBx12	SAP10	ATBx	SAP	0.297014
	0	ATBxSAP2	ATBxSAP1	ATBxSAP	ATBxSAP	0.0642133
	1	ATBxSAP3	ATBxSAP1	ATBxSAP	ATBxSAP	0.0759857
	2	ATBxSAP3	ATBxSAP2	ATBxSAP	ATBxSAP	0.0376431
	3	ATBxSAP4	ATBxSAP1	ATBxSAP	ATBxSAP	0.13484
	4	ATBxSAP4	ATBxSAP2	ATBxSAP	ATBxSAP	0.14839
	5	ATBxSAP4	ATBxSAP3	ATBxSAP	ATBxSAP	0.166206
	6	ATBxSAP5	ATBxSAP1	ATBxSAP	ATBxSAP	0.0852935
	7	ATBxSAP5	ATBxSAP2	ATBxSAP	ATBxSAP	0.133724
	8	ATBxSAP5	ATBxSAP3	ATBxSAP	ATBxSAP	0.151755
	9	ATBxSAP5	ATBxSAP4	ATBxSAP	ATBxSAP	0.0832312
	10	ATBxSAP6	ATBxSAP1	ATBxSAP	ATBxSAP	0.231545
	11	ATBxSAP6	ATBxSAP2	ATBxSAP	ATBxSAP	0.239452
	12	ATBxSAP6	ATBxSAP3	ATBxSAP	ATBxSAP	0.262555
	13	ATBxSAP6	ATBxSAP4	ATBxSAP	ATBxSAP	0.128011
	14	ATBxSAP6	ATBxSAP5	ATBxSAP	ATBxSAP	0.172994
	15	ATBxSAP7	ATBxSAP1	ATBxSAP	ATBxSAP	0.0539914
	16	ATBxSAP7	ATBxSAP2	ATBxSAP	ATBxSAP	0.065457
	17	ATBxSAP7	ATBxSAP3	ATBxSAP	ATBxSAP	0.087111
	18	ATBxSAP7	ATBxSAP4	ATBxSAP	ATBxSAP	0.14234
	19	ATBxSAP7	ATBxSAP5	ATBxSAP	ATBxSAP	0.110775
	20	ATBxSAP7	ATBxSAP6	ATBxSAP	ATBxSAP	0.232103
	21	ATBxSAP8	ATBxSAP1	ATBxSAP	ATBxSAP	0.0744441
	22	ATBxSAP8	ATBxSAP2	ATBxSAP	ATBxSAP	0.105481
	23	ATBxSAP8	ATBxSAP3	ATBxSAP	ATBxSAP	0.119268
	24	ATBxSAP8	ATBxSAP4	ATBxSAP	ATBxSAP	0.149707
	25	ATBxSAP8	ATBxSAP5	ATBxSAP	ATBxSAP	0.109534
	26	ATBxSAP8	ATBxSAP6	ATBxSAP	ATBxSAP	0.237539
	27	ATBxSAP8	ATBxSAP7	ATBxSAP	ATBxSAP	0.0679085
	28	ATBxSAP9	ATBxSAP1	ATBxSAP	ATBxSAP	0.125748
	29	ATBxSAP9	ATBxSAP2	ATBxSAP	ATBxSAP	0.160775
	30	ATBxSAP9	ATBxSAP3	ATBxSAP	ATBxSAP	0.183632
	31	ATBxSAP9	ATBxSAP4	ATBxSAP	ATBxSAP	0.13024
	32	ATBxSAP9	ATBxSAP5	ATBxSAP	ATBxSAP	0.083853
	33	ATBxSAP9	ATBxSAP6	ATBxSAP	ATBxSAP	0.191838
	34	ATBxSAP9	ATBxSAP7	ATBxSAP	ATBxSAP	0.130612
	35	ATBxSAP9	ATBxSAP8	ATBxSAP	ATBxSAP	0.131535
	36	ATBxSAP10	ATBxSAP1	ATBxSAP	ATBxSAP	0.0682306
	37	ATBxSAP10	ATBxSAP2	ATBxSAP	ATBxSAP	0.0855135
	38	ATBxSAP10	ATBxSAP3	ATBxSAP	ATBxSAP	0.104274
	39	ATBxSAP10	ATBxSAP4	ATBxSAP	ATBxSAP	0.142767
	40	ATBxSAP10	ATBxSAP5	ATBxSAP	ATBxSAP	0.112438
	41	ATBxSAP10	ATBxSAP6	ATBxSAP	ATBxSAP	0.230181
	42	ATBxSAP10	ATBxSAP7	ATBxSAP	ATBxSAP	0.0501422
	43	ATBxSAP10	ATBxSAP8	ATBxSAP	ATBxSAP	0.06699
	44	ATBxSAP10	ATBxSAP9	ATBxSAP	ATBxSAP	0.145772
	45	ATBxSAP11	ATBxSAP1	ATBxSAP	ATBxSAP	0.147255
	46	ATBxSAP11	ATBxSAP2	ATBxSAP	ATBxSAP	0.185144
	47	ATBxSAP11	ATBxSAP3	ATBxSAP	ATBxSAP	0.20858
	48	ATBxSAP11	ATBxSAP4	ATBxSAP	ATBxSAP	0.153818
	49	ATBxSAP11	ATBxSAP5	ATBxSAP	ATBxSAP	0.104065
	50	ATBxSAP11	ATBxSAP6	ATBxSAP	ATBxSAP	0.177534
	51	ATBxSAP11	ATBxSAP7	ATBxSAP	ATBxSAP	0.144953
	52	ATBxSAP11	ATBxSAP8	ATBxSAP	ATBxSAP	0.144526
	53	ATBxSAP11	ATBxSAP9	ATBxSAP	ATBxSAP	0.0751788
	54	ATBxSAP11	ATBxSAP10	ATBxSAP	ATBxSAP	0.142735
	55	ATBxSAP12	ATBxSAP1	ATBxSAP	ATBxSAP	0.069433
	56	ATBxSAP12	ATBxSAP2	ATBxSAP	ATBxSAP	0.0923609
	57	ATBxSAP12	ATBxSAP3	ATBxSAP	ATBxSAP	0.106461
	58	ATBxSAP12	ATBxSAP4	ATBxSAP	ATBxSAP	0.143018
	59	ATBxSAP12	ATBxSAP5	ATBxSAP	ATBxSAP	0.107241
	60	ATBxSAP12	ATBxSAP6	ATBxSAP	ATBxSAP	0.229619
	61	ATBxSAP12	ATBxSAP7	ATBxSAP	ATBxSAP	0.0574891
	62	ATBxSAP12	ATBxSAP8	ATBxSAP	ATBxSAP	0.0590891
	63	ATBxSAP12	ATBxSAP9	ATBxSAP	ATBxSAP	0.135063
	64	ATBxSAP12	ATBxSAP10	ATBxSAP	ATBxSAP	0.0629395
	65	ATBxSAP12	ATBxSAP11	ATBxSAP	ATBxSAP	0.145707
	66	ATBxSAP1	ATBx1	ATBxSAP	ATBx	0.0770194
	67	ATBxSAP1	ATBx2	ATBxSAP	ATBx	0.0820022
	68	ATBxSAP1	ATBx3	ATBxSAP	ATBx	0.0823033
	69	ATBxSAP1	ATBx4	ATBxSAP	ATBx	0.0546972
	70	ATBxSAP1	ATBx5	ATBxSAP	ATBx	0.0872921
	71	ATBxSAP1	ATBx6	ATBxSAP	ATBx	0.0864746
	72	ATBxSAP1	ATBx7	ATBxSAP	ATBx	0.0472032
	73	ATBxSAP1	ATBx8	ATBxSAP	ATBx	0.0480065
	74	ATBxSAP1	ATBx9	ATBxSAP	ATBx	0.0465022
	75	ATBxSAP1	ATBx10	ATBxSAP	ATBx	0.0960079
	76	ATBxSAP1	ATBx11	ATBxSAP	ATBx	0.0666819
	77	ATBxSAP1	ATBx12	ATBxSAP	ATBx	0.0808629
	78	ATBxSAP2	ATBx1	ATBxSAP	ATBx	0.0372277
	79	ATBxSAP2	ATBx2	ATBxSAP	ATBx	0.0428858
	80	ATBxSAP2	ATBx3	ATBxSAP	ATBx	0.0465744
	81	ATBxSAP2	ATBx4	ATBxSAP	ATBx	0.0402834
	82	ATBxSAP2	ATBx5	ATBxSAP	ATBx	0.0508815
	83	ATBxSAP2	ATBx6	ATBxSAP	ATBx	0.0522403
	84	ATBxSAP2	ATBx7	ATBxSAP	ATBx	0.0600936
	85	ATBxSAP2	ATBx8	ATBxSAP	ATBx	0.0438461
	86	ATBxSAP2	ATBx9	ATBxSAP	ATBx	0.0394731
	87	ATBxSAP2	ATBx10	ATBxSAP	ATBx	0.117076
	88	ATBxSAP2	ATBx11	ATBxSAP	ATBx	0.0900795
	89	ATBxSAP2	ATBx12	ATBxSAP	ATBx	0.113375
	90	ATBxSAP3	ATBx1	ATBxSAP	ATBx	0.00764256
	91	ATBxSAP3	ATBx2	ATBxSAP	ATBx	0.0105524
	92	ATBxSAP3	ATBx3	ATBxSAP	ATBx	0.0143518
	93	ATBxSAP3	ATBx4	ATBxSAP	ATBx	0.0482822
	94	ATBxSAP3	ATBx5	ATBxSAP	ATBx	0.0167987
	95	ATBxSAP3	ATBx6	ATBxSAP	ATBx	0.0189711
	96	ATBxSAP3	ATBx7	ATBxSAP	ATBx	0.0865647
	97	ATBxSAP3	ATBx8	ATBxSAP	ATBx	0.0505174
	98	ATBxSAP3	ATBx9	ATBxSAP	ATBx	0.0501742
	99	ATBxSAP3	ATBx10	ATBxSAP	ATBx	0.13537
	100	ATBxSAP3	ATBx11	ATBxSAP	ATBx	0.0997212
	101	ATBxSAP3	ATBx12	ATBxSAP	ATBx	0.127261
	102	ATBxSAP4	ATBx1	ATBxSAP	ATBx	0.16941
	103	ATBxSAP4	ATBx2	ATBxSAP	ATBx	0.174613
	104	ATBxSAP4	ATBx3	ATBxSAP	ATBx	0.174754
	105	ATBxSAP4	ATBx4	ATBxSAP	ATBx	0.142569
	106	ATBxSAP4	ATBx5	ATBxSAP	ATBx	0.178275
	107	ATBxSAP4	ATBx6	ATBxSAP	ATBx	0.171562
	108	ATBxSAP4	ATBx7	ATBxSAP	ATBx	0.124798
	109	ATBxSAP4	ATBx8	ATBxSAP	ATBx	0.140351
	110	ATBxSAP4	ATBx9	ATBxSAP	ATBx	0.145062
	111	ATBxSAP4	ATBx10	ATBxSAP	ATBx	0.101881
	112	ATBxSAP4	ATBx11	ATBxSAP	ATBx	0.126088
	113	ATBxSAP4	ATBx12	ATBxSAP	ATBx	0.124959
	114	ATBxSAP5	ATBx1	ATBxSAP	ATBx	0.153255
	115	ATBxSAP5	ATBx2	ATBxSAP	ATBx	0.158381
	116	ATBxSAP5	ATBx3	ATBxSAP	ATBx	0.159147
	117	ATBxSAP5	ATBx4	ATBxSAP	ATBx	0.121244
	118	ATBxSAP5	ATBx5	ATBxSAP	ATBx	0.164274
	119	ATBxSAP5	ATBx6	ATBxSAP	ATBx	0.157522
	120	ATBxSAP5	ATBx7	ATBxSAP	ATBx	0.0891271
	121	ATBxSAP5	ATBx8	ATBxSAP	ATBx	0.116073
	122	ATBxSAP5	ATBx9	ATBxSAP	ATBx	0.113282
	123	ATBxSAP5	ATBx10	ATBxSAP	ATBx	0.0711157
	124	ATBxSAP5	ATBx11	ATBxSAP	ATBx	0.0961925
	125	ATBxSAP5	ATBx12	ATBxSAP	ATBx	0.0791157
	126	ATBxSAP6	ATBx1	ATBxSAP	ATBx	0.265135
	127	ATBxSAP6	ATBx2	ATBxSAP	ATBx	0.270385
	128	ATBxSAP6	ATBx3	ATBxSAP	ATBx	0.271143
	129	ATBxSAP6	ATBx4	ATBxSAP	ATBx	0.238791
	130	ATBxSAP6	ATBx5	ATBxSAP	ATBx	0.275235
	131	ATBxSAP6	ATBx6	ATBxSAP	ATBx	0.2688
	132	ATBxSAP6	ATBx7	ATBxSAP	ATBx	0.214786
	133	ATBxSAP6	ATBx8	ATBxSAP	ATBx	0.234607
	134	ATBxSAP6	ATBx9	ATBxSAP	ATBx	0.238619
	135	ATBxSAP6	ATBx10	ATBxSAP	ATBx	0.190575
	136	ATBxSAP6	ATBx11	ATBxSAP	ATBx	0.214983
	137	ATBxSAP6	ATBx12	ATBxSAP	ATBx	0.216475
	138	ATBxSAP7	ATBx1	ATBxSAP	ATBx	0.0846299
	139	ATBxSAP7	ATBx2	ATBxSAP	ATBx	0.0886457
	140	ATBxSAP7	ATBx3	ATBxSAP	ATBx	0.0911416
	141	ATBxSAP7	ATBx4	ATBxSAP	ATBx	0.0698867
	142	ATBxSAP7	ATBx5	ATBxSAP	ATBx	0.0948899
	143	ATBxSAP7	ATBx6	ATBxSAP	ATBx	0.09566
	144	ATBxSAP7	ATBx7	ATBxSAP	ATBx	0.0514861
	145	ATBxSAP7	ATBx8	ATBxSAP	ATBx	0.0580302
	146	ATBxSAP7	ATBx9	ATBxSAP	ATBx	0.0554931
	147	ATBxSAP7	ATBx10	ATBxSAP	ATBx	0.108874
	148	ATBxSAP7	ATBx11	ATBxSAP	ATBx	0.0784348
	149	ATBxSAP7	ATBx12	ATBxSAP	ATBx	0.0848491
	150	ATBxSAP8	ATBx1	ATBxSAP	ATBx	0.117853
	151	ATBxSAP8	ATBx2	ATBxSAP	ATBx	0.122231
	152	ATBxSAP8	ATBx3	ATBxSAP	ATBx	0.123076
	153	ATBxSAP8	ATBx4	ATBxSAP	ATBx	0.0978091
	154	ATBxSAP8	ATBx5	ATBxSAP	ATBx	0.127104
	155	ATBxSAP8	ATBx6	ATBxSAP	ATBx	0.126879
	156	ATBxSAP8	ATBx7	ATBxSAP	ATBx	0.0820117
	157	ATBxSAP8	ATBx8	ATBxSAP	ATBx	0.0861593
	158	ATBxSAP8	ATBx9	ATBxSAP	ATBx	0.081855
	159	ATBxSAP8	ATBx10	ATBxSAP	ATBx	0.115598
	160	ATBxSAP8	ATBx11	ATBxSAP	ATBx	0.0982896
	161	ATBxSAP8	ATBx12	ATBxSAP	ATBx	0.0874376
	162	ATBxSAP9	ATBx1	ATBxSAP	ATBx	0.18241
	163	ATBxSAP9	ATBx2	ATBxSAP	ATBx	0.187568
	164	ATBxSAP9	ATBx3	ATBxSAP	ATBx	0.191318
	165	ATBxSAP9	ATBx4	ATBxSAP	ATBx	0.152956
	166	ATBxSAP9	ATBx5	ATBxSAP	ATBx	0.196778
	167	ATBxSAP9	ATBx6	ATBxSAP	ATBx	0.193337
	168	ATBxSAP9	ATBx7	ATBxSAP	ATBx	0.110327
	169	ATBxSAP9	ATBx8	ATBxSAP	ATBx	0.142103
	170	ATBxSAP9	ATBx9	ATBxSAP	ATBx	0.140283
	171	ATBxSAP9	ATBx10	ATBxSAP	ATBx	0.0847604
	172	ATBxSAP9	ATBx11	ATBxSAP	ATBx	0.124747
	173	ATBxSAP9	ATBx12	ATBxSAP	ATBx	0.0793256
	174	ATBxSAP10	ATBx1	ATBxSAP	ATBx	0.101963
	175	ATBxSAP10	ATBx2	ATBxSAP	ATBx	0.106236
	176	ATBxSAP10	ATBx3	ATBxSAP	ATBx	0.109012
	177	ATBxSAP10	ATBx4	ATBxSAP	ATBx	0.0923575
	178	ATBxSAP10	ATBx5	ATBxSAP	ATBx	0.112487
	179	ATBxSAP10	ATBx6	ATBxSAP	ATBx	0.110876
	180	ATBxSAP10	ATBx7	ATBxSAP	ATBx	0.0766946
	181	ATBxSAP10	ATBx8	ATBxSAP	ATBx	0.0876246
	182	ATBxSAP10	ATBx9	ATBxSAP	ATBx	0.0827517
	183	ATBxSAP10	ATBx10	ATBxSAP	ATBx	0.113803
	184	ATBxSAP10	ATBx11	ATBxSAP	ATBx	0.0931259
	185	ATBxSAP10	ATBx12	ATBxSAP	ATBx	0.0999424
	186	ATBxSAP11	ATBx1	ATBxSAP	ATBx	0.20796
	187	ATBxSAP11	ATBx2	ATBxSAP	ATBx	0.21307
	188	ATBxSAP11	ATBx3	ATBxSAP	ATBx	0.216392
	189	ATBxSAP11	ATBx4	ATBxSAP	ATBx	0.179878
	190	ATBxSAP11	ATBx5	ATBxSAP	ATBx	0.221818
	191	ATBxSAP11	ATBx6	ATBxSAP	ATBx	0.218212
	192	ATBxSAP11	ATBx7	ATBxSAP	ATBx	0.135888
	193	ATBxSAP11	ATBx8	ATBxSAP	ATBx	0.166855
	194	ATBxSAP11	ATBx9	ATBxSAP	ATBx	0.168363
	195	ATBxSAP11	ATBx10	ATBxSAP	ATBx	0.0999996
	196	ATBxSAP11	ATBx11	ATBxSAP	ATBx	0.152776
	197	ATBxSAP11	ATBx12	ATBxSAP	ATBx	0.107505
	198	ATBxSAP12	ATBx1	ATBxSAP	ATBx	0.104892
	199	ATBxSAP12	ATBx2	ATBxSAP	ATBx	0.109459
	200	ATBxSAP12	ATBx3	ATBxSAP	ATBx	0.110965
	201	ATBxSAP12	ATBx4	ATBxSAP	ATBx	0.0904201
	202	ATBxSAP12	ATBx5	ATBxSAP	ATBx	0.115007
	203	ATBxSAP12	ATBx6	ATBxSAP	ATBx	0.111692
	204	ATBxSAP12	ATBx7	ATBxSAP	ATBx	0.078553
	205	ATBxSAP12	ATBx8	ATBxSAP	ATBx	0.0793781
	206	ATBxSAP12	ATBx9	ATBxSAP	ATBx	0.0767498
	207	ATBxSAP12	ATBx10	ATBxSAP	ATBx	0.115968
	208	ATBxSAP12	ATBx11	ATBxSAP	ATBx	0.0903294
	209	ATBxSAP12	ATBx12	ATBxSAP	ATBx	0.0809007
	210	ATBxSAP1	Control1	ATBxSAP	Control	0.317176
	211	ATBxSAP1	Control2	ATBxSAP	Control	0.331072
	212	ATBxSAP1	Control3	ATBxSAP	Control	0.309649
	213	ATBxSAP1	Control4	ATBxSAP	Control	0.331455
	214	ATBxSAP1	Control5	ATBxSAP	Control	0.319257
	215	ATBxSAP1	Control6	ATBxSAP	Control	0.296691
	216	ATBxSAP1	Control7	ATBxSAP	Control	0.338242
	217	ATBxSAP1	Control8	ATBxSAP	Control	0.319484
	218	ATBxSAP1	Control9	ATBxSAP	Control	0.30499
	219	ATBxSAP1	Control10	ATBxSAP	Control	0.321957
	220	ATBxSAP1	Control11	ATBxSAP	Control	0.272332
	221	ATBxSAP2	Control1	ATBxSAP	Control	0.364547
	222	ATBxSAP2	Control2	ATBxSAP	Control	0.375083
	223	ATBxSAP2	Control3	ATBxSAP	Control	0.347141
	224	ATBxSAP2	Control4	ATBxSAP	Control	0.371652
	225	ATBxSAP2	Control5	ATBxSAP	Control	0.359486
	226	ATBxSAP2	Control6	ATBxSAP	Control	0.339637
	227	ATBxSAP2	Control7	ATBxSAP	Control	0.376973
	228	ATBxSAP2	Control8	ATBxSAP	Control	0.362815
	229	ATBxSAP2	Control9	ATBxSAP	Control	0.340197
	230	ATBxSAP2	Control10	ATBxSAP	Control	0.36428
	231	ATBxSAP2	Control11	ATBxSAP	Control	0.316816
	232	ATBxSAP3	Control1	ATBxSAP	Control	0.374732
	233	ATBxSAP3	Control2	ATBxSAP	Control	0.388713
	234	ATBxSAP3	Control3	ATBxSAP	Control	0.367145
	235	ATBxSAP3	Control4	ATBxSAP	Control	0.391506
	236	ATBxSAP3	Control5	ATBxSAP	Control	0.378456
	237	ATBxSAP3	Control6	ATBxSAP	Control	0.354562
	238	ATBxSAP3	Control7	ATBxSAP	Control	0.394175
	239	ATBxSAP3	Control8	ATBxSAP	Control	0.376749
	240	ATBxSAP3	Control9	ATBxSAP	Control	0.36211
	241	ATBxSAP3	Control10	ATBxSAP	Control	0.379826
	242	ATBxSAP3	Control11	ATBxSAP	Control	0.332841
	243	ATBxSAP4	Control1	ATBxSAP	Control	0.36317
	244	ATBxSAP4	Control2	ATBxSAP	Control	0.371615
	245	ATBxSAP4	Control3	ATBxSAP	Control	0.357854
	246	ATBxSAP4	Control4	ATBxSAP	Control	0.371079
	247	ATBxSAP4	Control5	ATBxSAP	Control	0.362358
	248	ATBxSAP4	Control6	ATBxSAP	Control	0.315486
	249	ATBxSAP4	Control7	ATBxSAP	Control	0.351895
	250	ATBxSAP4	Control8	ATBxSAP	Control	0.344592
	251	ATBxSAP4	Control9	ATBxSAP	Control	0.314045
	252	ATBxSAP4	Control10	ATBxSAP	Control	0.343828
	253	ATBxSAP4	Control11	ATBxSAP	Control	0.284142
	254	ATBxSAP5	Control1	ATBxSAP	Control	0.305587
	255	ATBxSAP5	Control2	ATBxSAP	Control	0.317178
	256	ATBxSAP5	Control3	ATBxSAP	Control	0.300426
	257	ATBxSAP5	Control4	ATBxSAP	Control	0.317398
	258	ATBxSAP5	Control5	ATBxSAP	Control	0.303006
	259	ATBxSAP5	Control6	ATBxSAP	Control	0.266818
	260	ATBxSAP5	Control7	ATBxSAP	Control	0.306402
	261	ATBxSAP5	Control8	ATBxSAP	Control	0.296591
	262	ATBxSAP5	Control9	ATBxSAP	Control	0.275154
	263	ATBxSAP5	Control10	ATBxSAP	Control	0.300041
	264	ATBxSAP5	Control11	ATBxSAP	Control	0.240869
	265	ATBxSAP6	Control1	ATBxSAP	Control	0.389165
	266	ATBxSAP6	Control2	ATBxSAP	Control	0.380233
	267	ATBxSAP6	Control3	ATBxSAP	Control	0.377632
	268	ATBxSAP6	Control4	ATBxSAP	Control	0.379039
	269	ATBxSAP6	Control5	ATBxSAP	Control	0.382655
	270	ATBxSAP6	Control6	ATBxSAP	Control	0.336016
	271	ATBxSAP6	Control7	ATBxSAP	Control	0.347047
	272	ATBxSAP6	Control8	ATBxSAP	Control	0.352293
	273	ATBxSAP6	Control9	ATBxSAP	Control	0.308241
	274	ATBxSAP6	Control10	ATBxSAP	Control	0.357089
	275	ATBxSAP6	Control11	ATBxSAP	Control	0.29971
	276	ATBxSAP7	Control1	ATBxSAP	Control	0.329232
	277	ATBxSAP7	Control2	ATBxSAP	Control	0.33535
	278	ATBxSAP7	Control3	ATBxSAP	Control	0.305317
	279	ATBxSAP7	Control4	ATBxSAP	Control	0.325325
	280	ATBxSAP7	Control5	ATBxSAP	Control	0.316762
	281	ATBxSAP7	Control6	ATBxSAP	Control	0.305345
	282	ATBxSAP7	Control7	ATBxSAP	Control	0.350455
	283	ATBxSAP7	Control8	ATBxSAP	Control	0.332795
	284	ATBxSAP7	Control9	ATBxSAP	Control	0.309004
	285	ATBxSAP7	Control10	ATBxSAP	Control	0.333526
	286	ATBxSAP7	Control11	ATBxSAP	Control	0.281833
	287	ATBxSAP8	Control1	ATBxSAP	Control	0.295647
	288	ATBxSAP8	Control2	ATBxSAP	Control	0.308012
	289	ATBxSAP8	Control3	ATBxSAP	Control	0.285771
	290	ATBxSAP8	Control4	ATBxSAP	Control	0.306784
	291	ATBxSAP8	Control5	ATBxSAP	Control	0.296662
	292	ATBxSAP8	Control6	ATBxSAP	Control	0.271228
	293	ATBxSAP8	Control7	ATBxSAP	Control	0.313375
	294	ATBxSAP8	Control8	ATBxSAP	Control	0.298745
	295	ATBxSAP8	Control9	ATBxSAP	Control	0.276911
	296	ATBxSAP8	Control10	ATBxSAP	Control	0.300776
	297	ATBxSAP8	Control11	ATBxSAP	Control	0.243529
	298	ATBxSAP9	Control1	ATBxSAP	Control	0.279815
	299	ATBxSAP9	Control2	ATBxSAP	Control	0.271347
	300	ATBxSAP9	Control3	ATBxSAP	Control	0.278262
	301	ATBxSAP9	Control4	ATBxSAP	Control	0.269815
	302	ATBxSAP9	Control5	ATBxSAP	Control	0.27515
	303	ATBxSAP9	Control6	ATBxSAP	Control	0.239658
	304	ATBxSAP9	Control7	ATBxSAP	Control	0.27425
	305	ATBxSAP9	Control8	ATBxSAP	Control	0.255673
	306	ATBxSAP9	Control9	ATBxSAP	Control	0.238339
	307	ATBxSAP9	Control10	ATBxSAP	Control	0.270804
	308	ATBxSAP9	Control11	ATBxSAP	Control	0.227042
	309	ATBxSAP10	Control1	ATBxSAP	Control	0.328089
	310	ATBxSAP10	Control2	ATBxSAP	Control	0.331178
	311	ATBxSAP10	Control3	ATBxSAP	Control	0.301478
	312	ATBxSAP10	Control4	ATBxSAP	Control	0.327564
	313	ATBxSAP10	Control5	ATBxSAP	Control	0.31748
	314	ATBxSAP10	Control6	ATBxSAP	Control	0.30542
	315	ATBxSAP10	Control7	ATBxSAP	Control	0.337234
	316	ATBxSAP10	Control8	ATBxSAP	Control	0.33235
	317	ATBxSAP10	Control9	ATBxSAP	Control	0.300564
	318	ATBxSAP10	Control10	ATBxSAP	Control	0.331185
	319	ATBxSAP10	Control11	ATBxSAP	Control	0.272697
	320	ATBxSAP11	Control1	ATBxSAP	Control	0.2513
	321	ATBxSAP11	Control2	ATBxSAP	Control	0.247125
	322	ATBxSAP11	Control3	ATBxSAP	Control	0.237476
	323	ATBxSAP11	Control4	ATBxSAP	Control	0.24677
	324	ATBxSAP11	Control5	ATBxSAP	Control	0.237535
	325	ATBxSAP11	Control6	ATBxSAP	Control	0.207721
	326	ATBxSAP11	Control7	ATBxSAP	Control	0.24674
	327	ATBxSAP11	Control8	ATBxSAP	Control	0.23675
	328	ATBxSAP11	Control9	ATBxSAP	Control	0.211633
	329	ATBxSAP11	Control10	ATBxSAP	Control	0.240313
	330	ATBxSAP11	Control11	ATBxSAP	Control	0.187297
	331	ATBxSAP12	Control1	ATBxSAP	Control	0.333799
	332	ATBxSAP12	Control2	ATBxSAP	Control	0.340185
	333	ATBxSAP12	Control3	ATBxSAP	Control	0.312832
	334	ATBxSAP12	Control4	ATBxSAP	Control	0.342842
	335	ATBxSAP12	Control5	ATBxSAP	Control	0.336985
	336	ATBxSAP12	Control6	ATBxSAP	Control	0.308801
	337	ATBxSAP12	Control7	ATBxSAP	Control	0.353578
	338	ATBxSAP12	Control8	ATBxSAP	Control	0.327676
	339	ATBxSAP12	Control9	ATBxSAP	Control	0.316002
	340	ATBxSAP12	Control10	ATBxSAP	Control	0.334207
	341	ATBxSAP12	Control11	ATBxSAP	Control	0.271352
	342	ATBxSAP1	SAP1	ATBxSAP	SAP	0.321064
	343	ATBxSAP1	SAP2	ATBxSAP	SAP	0.283144
	344	ATBxSAP1	SAP3	ATBxSAP	SAP	0.265032
	345	ATBxSAP1	SAP4	ATBxSAP	SAP	0.284417
	346	ATBxSAP1	SAP5	ATBxSAP	SAP	0.282957
	347	ATBxSAP1	SAP6	ATBxSAP	SAP	0.281398
	348	ATBxSAP1	SAP7	ATBxSAP	SAP	0.276877
	349	ATBxSAP1	SAP8	ATBxSAP	SAP	0.23247
	350	ATBxSAP1	SAP9	ATBxSAP	SAP	0.266808
	351	ATBxSAP1	SAP10	ATBxSAP	SAP	0.301497
	352	ATBxSAP2	SAP1	ATBxSAP	SAP	0.351315
	353	ATBxSAP2	SAP2	ATBxSAP	SAP	0.328411
	354	ATBxSAP2	SAP3	ATBxSAP	SAP	0.313465
	355	ATBxSAP2	SAP4	ATBxSAP	SAP	0.302675
	356	ATBxSAP2	SAP5	ATBxSAP	SAP	0.311142
	357	ATBxSAP2	SAP6	ATBxSAP	SAP	0.307727
	358	ATBxSAP2	SAP7	ATBxSAP	SAP	0.30317
	359	ATBxSAP2	SAP8	ATBxSAP	SAP	0.273628
	360	ATBxSAP2	SAP9	ATBxSAP	SAP	0.288875
	361	ATBxSAP2	SAP10	ATBxSAP	SAP	0.337083
	362	ATBxSAP3	SAP1	ATBxSAP	SAP	0.364881
	363	ATBxSAP3	SAP2	ATBxSAP	SAP	0.341126
	364	ATBxSAP3	SAP3	ATBxSAP	SAP	0.322608
	365	ATBxSAP3	SAP4	ATBxSAP	SAP	0.331922
	366	ATBxSAP3	SAP5	ATBxSAP	SAP	0.340751
	367	ATBxSAP3	SAP6	ATBxSAP	SAP	0.339198
	368	ATBxSAP3	SAP7	ATBxSAP	SAP	0.336951
	369	ATBxSAP3	SAP8	ATBxSAP	SAP	0.29101
	370	ATBxSAP3	SAP9	ATBxSAP	SAP	0.322642
	371	ATBxSAP3	SAP10	ATBxSAP	SAP	0.356161
	372	ATBxSAP4	SAP1	ATBxSAP	SAP	0.372197
	373	ATBxSAP4	SAP2	ATBxSAP	SAP	0.314633
	374	ATBxSAP4	SAP3	ATBxSAP	SAP	0.311157
	375	ATBxSAP4	SAP4	ATBxSAP	SAP	0.308705
	376	ATBxSAP4	SAP5	ATBxSAP	SAP	0.292468
	377	ATBxSAP4	SAP6	ATBxSAP	SAP	0.285708
	378	ATBxSAP4	SAP7	ATBxSAP	SAP	0.281829
	379	ATBxSAP4	SAP8	ATBxSAP	SAP	0.240049
	380	ATBxSAP4	SAP9	ATBxSAP	SAP	0.278261
	381	ATBxSAP4	SAP10	ATBxSAP	SAP	0.271782
	382	ATBxSAP5	SAP1	ATBxSAP	SAP	0.33373
	383	ATBxSAP5	SAP2	ATBxSAP	SAP	0.260086
	384	ATBxSAP5	SAP3	ATBxSAP	SAP	0.252435
	385	ATBxSAP5	SAP4	ATBxSAP	SAP	0.26714
	386	ATBxSAP5	SAP5	ATBxSAP	SAP	0.245626
	387	ATBxSAP5	SAP6	ATBxSAP	SAP	0.241767
	388	ATBxSAP5	SAP7	ATBxSAP	SAP	0.23495
	389	ATBxSAP5	SAP8	ATBxSAP	SAP	0.202989
	390	ATBxSAP5	SAP9	ATBxSAP	SAP	0.235556
	391	ATBxSAP5	SAP10	ATBxSAP	SAP	0.266249
	392	ATBxSAP6	SAP1	ATBxSAP	SAP	0.408469
	393	ATBxSAP6	SAP2	ATBxSAP	SAP	0.330159
	394	ATBxSAP6	SAP3	ATBxSAP	SAP	0.338139
	395	ATBxSAP6	SAP4	ATBxSAP	SAP	0.329565
	396	ATBxSAP6	SAP5	ATBxSAP	SAP	0.288604
	397	ATBxSAP6	SAP6	ATBxSAP	SAP	0.296683
	398	ATBxSAP6	SAP7	ATBxSAP	SAP	0.289722
	399	ATBxSAP6	SAP8	ATBxSAP	SAP	0.268812
	400	ATBxSAP6	SAP9	ATBxSAP	SAP	0.301366
	401	ATBxSAP6	SAP10	ATBxSAP	SAP	0.285976
	402	ATBxSAP7	SAP1	ATBxSAP	SAP	0.333726
	403	ATBxSAP7	SAP2	ATBxSAP	SAP	0.294811
	404	ATBxSAP7	SAP3	ATBxSAP	SAP	0.279996
	405	ATBxSAP7	SAP4	ATBxSAP	SAP	0.285925
	406	ATBxSAP7	SAP5	ATBxSAP	SAP	0.280417
	407	ATBxSAP7	SAP6	ATBxSAP	SAP	0.278262
	408	ATBxSAP7	SAP7	ATBxSAP	SAP	0.272754
	409	ATBxSAP7	SAP8	ATBxSAP	SAP	0.25349
	410	ATBxSAP7	SAP9	ATBxSAP	SAP	0.280573
	411	ATBxSAP7	SAP10	ATBxSAP	SAP	0.316595
	412	ATBxSAP8	SAP1	ATBxSAP	SAP	0.30993
	413	ATBxSAP8	SAP2	ATBxSAP	SAP	0.264077
	414	ATBxSAP8	SAP3	ATBxSAP	SAP	0.245162
	415	ATBxSAP8	SAP4	ATBxSAP	SAP	0.265628
	416	ATBxSAP8	SAP5	ATBxSAP	SAP	0.258708
	417	ATBxSAP8	SAP6	ATBxSAP	SAP	0.255779
	418	ATBxSAP8	SAP7	ATBxSAP	SAP	0.24321
	419	ATBxSAP8	SAP8	ATBxSAP	SAP	0.2247
	420	ATBxSAP8	SAP9	ATBxSAP	SAP	0.258662
	421	ATBxSAP8	SAP10	ATBxSAP	SAP	0.294367
	422	ATBxSAP9	SAP1	ATBxSAP	SAP	0.311599
	423	ATBxSAP9	SAP2	ATBxSAP	SAP	0.222126
	424	ATBxSAP9	SAP3	ATBxSAP	SAP	0.232072
	425	ATBxSAP9	SAP4	ATBxSAP	SAP	0.237373
	426	ATBxSAP9	SAP5	ATBxSAP	SAP	0.200906
	427	ATBxSAP9	SAP6	ATBxSAP	SAP	0.214153
	428	ATBxSAP9	SAP7	ATBxSAP	SAP	0.207539
	429	ATBxSAP9	SAP8	ATBxSAP	SAP	0.20704
	430	ATBxSAP9	SAP9	ATBxSAP	SAP	0.249247
	431	ATBxSAP9	SAP10	ATBxSAP	SAP	0.240488
	432	ATBxSAP10	SAP1	ATBxSAP	SAP	0.325186
	433	ATBxSAP10	SAP2	ATBxSAP	SAP	0.291883
	434	ATBxSAP10	SAP3	ATBxSAP	SAP	0.278628
	435	ATBxSAP10	SAP4	ATBxSAP	SAP	0.282425
	436	ATBxSAP10	SAP5	ATBxSAP	SAP	0.280745
	437	ATBxSAP10	SAP6	ATBxSAP	SAP	0.271469
	438	ATBxSAP10	SAP7	ATBxSAP	SAP	0.265586
	439	ATBxSAP10	SAP8	ATBxSAP	SAP	0.234498
	440	ATBxSAP10	SAP9	ATBxSAP	SAP	0.265791
	441	ATBxSAP10	SAP10	ATBxSAP	SAP	0.301802
	442	ATBxSAP11	SAP1	ATBxSAP	SAP	0.317764
	443	ATBxSAP11	SAP2	ATBxSAP	SAP	0.207061
	444	ATBxSAP11	SAP3	ATBxSAP	SAP	0.202288
	445	ATBxSAP11	SAP4	ATBxSAP	SAP	0.219958
	446	ATBxSAP11	SAP5	ATBxSAP	SAP	0.177936
	447	ATBxSAP11	SAP6	ATBxSAP	SAP	0.177594
	448	ATBxSAP11	SAP7	ATBxSAP	SAP	0.163643
	449	ATBxSAP11	SAP8	ATBxSAP	SAP	0.182158
	450	ATBxSAP11	SAP9	ATBxSAP	SAP	0.225314
	451	ATBxSAP11	SAP10	ATBxSAP	SAP	0.235365
	452	ATBxSAP12	SAP1	ATBxSAP	SAP	0.347227
	453	ATBxSAP12	SAP2	ATBxSAP	SAP	0.305375
	454	ATBxSAP12	SAP3	ATBxSAP	SAP	0.276885
	455	ATBxSAP12	SAP4	ATBxSAP	SAP	0.302523
	456	ATBxSAP12	SAP5	ATBxSAP	SAP	0.293551
	457	ATBxSAP12	SAP6	ATBxSAP	SAP	0.292597
	458	ATBxSAP12	SAP7	ATBxSAP	SAP	0.277143
	459	ATBxSAP12	SAP8	ATBxSAP	SAP	0.258736
	460	ATBxSAP12	SAP9	ATBxSAP	SAP	0.289257
	461	ATBxSAP12	SAP10	ATBxSAP	SAP	0.328199
	0	Control2	Control1	Control	Control	0.0913182
	1	Control3	Control1	Control	Control	0.107652
	2	Control3	Control2	Control	Control	0.118953
	3	Control4	Control1	Control	Control	0.0990632
	4	Control4	Control2	Control	Control	0.0819484
	5	Control4	Control3	Control	Control	0.146825
	6	Control5	Control1	Control	Control	0.0544537
	7	Control5	Control2	Control	Control	0.0911162
	8	Control5	Control3	Control	Control	0.0901128
	9	Control5	Control4	Control	Control	0.0762055
	10	Control6	Control1	Control	Control	0.104869
	11	Control6	Control2	Control	Control	0.100432
	12	Control6	Control3	Control	Control	0.131048
	13	Control6	Control4	Control	Control	0.151654
	14	Control6	Control5	Control	Control	0.107685
	15	Control7	Control1	Control	Control	0.134897
	16	Control7	Control2	Control	Control	0.118589
	17	Control7	Control3	Control	Control	0.174987
	18	Control7	Control4	Control	Control	0.139932
	19	Control7	Control5	Control	Control	0.13052
	20	Control7	Control6	Control	Control	0.121485
	21	Control8	Control1	Control	Control	0.152128
	22	Control8	Control2	Control	Control	0.120156
	23	Control8	Control3	Control	Control	0.159572
	24	Control8	Control4	Control	Control	0.124295
	25	Control8	Control5	Control	Control	0.145125
	26	Control8	Control6	Control	Control	0.149732
	27	Control8	Control7	Control	Control	0.119436
	28	Control9	Control1	Control	Control	0.166085
	29	Control9	Control2	Control	Control	0.132723
	30	Control9	Control3	Control	Control	0.165749
	31	Control9	Control4	Control	Control	0.151605
	32	Control9	Control5	Control	Control	0.166325
	33	Control9	Control6	Control	Control	0.133629
	34	Control9	Control7	Control	Control	0.153714
	35	Control9	Control8	Control	Control	0.138494
	36	Control10	Control1	Control	Control	0.0853441
	37	Control10	Control2	Control	Control	0.108116
	38	Control10	Control3	Control	Control	0.139972
	39	Control10	Control4	Control	Control	0.148074
	40	Control10	Control5	Control	Control	0.112001
	41	Control10	Control6	Control	Control	0.0697338
	42	Control10	Control7	Control	Control	0.123177
	43	Control10	Control8	Control	Control	0.161813
	44	Control10	Control9	Control	Control	0.165945
	45	Control11	Control1	Control	Control	0.150847
	46	Control11	Control2	Control	Control	0.130083
	47	Control11	Control3	Control	Control	0.159998
	48	Control11	Control4	Control	Control	0.166861
	49	Control11	Control5	Control	Control	0.160903
	50	Control11	Control6	Control	Control	0.0874947
	51	Control11	Control7	Control	Control	0.164878
	52	Control11	Control8	Control	Control	0.149734
	53	Control11	Control9	Control	Control	0.12796
	54	Control11	Control10	Control	Control	0.114417
	55	Control1	ATBx1	Control	ATBx	0.371403
	56	Control1	ATBx2	Control	ATBx	0.375275
	57	Control1	ATBx3	Control	ATBx	0.377586
	58	Control1	ATBx4	Control	ATBx	0.349028
	59	Control1	ATBx5	Control	ATBx	0.382608
	60	Control1	ATBx6	Control	ATBx	0.384601
	61	Control1	ATBx7	Control	ATBx	0.323398
	62	Control1	ATBx8	Control	ATBx	0.340353
	63	Control1	ATBx9	Control	ATBx	0.340557
	64	Control1	ATBx10	Control	ATBx	0.298266
	65	Control1	ATBx11	Control	ATBx	0.328631
	66	Control1	ATBx12	Control	ATBx	0.293249
	67	Control2	ATBx1	Control	ATBx	0.384354
	68	Control2	ATBx2	Control	ATBx	0.3885
	69	Control2	ATBx3	Control	ATBx	0.391618
	70	Control2	ATBx4	Control	ATBx	0.367891
	71	Control2	ATBx5	Control	ATBx	0.396765
	72	Control2	ATBx6	Control	ATBx	0.398159
	73	Control2	ATBx7	Control	ATBx	0.335014
	74	Control2	ATBx8	Control	ATBx	0.353435
	75	Control2	ATBx9	Control	ATBx	0.355448
	76	Control2	ATBx10	Control	ATBx	0.30516
	77	Control2	ATBx11	Control	ATBx	0.349005
	78	Control2	ATBx12	Control	ATBx	0.308193
	79	Control3	ATBx1	Control	ATBx	0.3639
	80	Control3	ATBx2	Control	ATBx	0.368052
	81	Control3	ATBx3	Control	ATBx	0.373424
	82	Control3	ATBx4	Control	ATBx	0.345681
	83	Control3	ATBx5	Control	ATBx	0.378151
	84	Control3	ATBx6	Control	ATBx	0.378191
	85	Control3	ATBx7	Control	ATBx	0.307485
	86	Control3	ATBx8	Control	ATBx	0.332014
	87	Control3	ATBx9	Control	ATBx	0.332298
	88	Control3	ATBx10	Control	ATBx	0.290319
	89	Control3	ATBx11	Control	ATBx	0.328339
	90	Control3	ATBx12	Control	ATBx	0.286929
	91	Control4	ATBx1	Control	ATBx	0.38696
	92	Control4	ATBx2	Control	ATBx	0.390705
	93	Control4	ATBx3	Control	ATBx	0.394317
	94	Control4	ATBx4	Control	ATBx	0.369188
	95	Control4	ATBx5	Control	ATBx	0.399455
	96	Control4	ATBx6	Control	ATBx	0.401135
	97	Control4	ATBx7	Control	ATBx	0.332529
	98	Control4	ATBx8	Control	ATBx	0.355829
	99	Control4	ATBx9	Control	ATBx	0.354915
	100	Control4	ATBx10	Control	ATBx	0.306787
	101	Control4	ATBx11	Control	ATBx	0.350335
	102	Control4	ATBx12	Control	ATBx	0.309701
	103	Control5	ATBx1	Control	ATBx	0.375069
	104	Control5	ATBx2	Control	ATBx	0.379683
	105	Control5	ATBx3	Control	ATBx	0.382913
	106	Control5	ATBx4	Control	ATBx	0.355049
	107	Control5	ATBx5	Control	ATBx	0.387899
	108	Control5	ATBx6	Control	ATBx	0.389336
	109	Control5	ATBx7	Control	ATBx	0.318541
	110	Control5	ATBx8	Control	ATBx	0.34254
	111	Control5	ATBx9	Control	ATBx	0.342144
	112	Control5	ATBx10	Control	ATBx	0.295627
	113	Control5	ATBx11	Control	ATBx	0.336259
	114	Control5	ATBx12	Control	ATBx	0.299182
	115	Control6	ATBx1	Control	ATBx	0.353118
	116	Control6	ATBx2	Control	ATBx	0.358164
	117	Control6	ATBx3	Control	ATBx	0.359864
	118	Control6	ATBx4	Control	ATBx	0.326006
	119	Control6	ATBx5	Control	ATBx	0.365017
	120	Control6	ATBx6	Control	ATBx	0.363577
	121	Control6	ATBx7	Control	ATBx	0.298446
	122	Control6	ATBx8	Control	ATBx	0.318991
	123	Control6	ATBx9	Control	ATBx	0.321562
	124	Control6	ATBx10	Control	ATBx	0.267887
	125	Control6	ATBx11	Control	ATBx	0.306846
	126	Control6	ATBx12	Control	ATBx	0.272377
	127	Control7	ATBx1	Control	ATBx	0.392955
	128	Control7	ATBx2	Control	ATBx	0.397789
	129	Control7	ATBx3	Control	ATBx	0.398544
	130	Control7	ATBx4	Control	ATBx	0.364518
	131	Control7	ATBx5	Control	ATBx	0.403186
	132	Control7	ATBx6	Control	ATBx	0.401014
	133	Control7	ATBx7	Control	ATBx	0.331467
	134	Control7	ATBx8	Control	ATBx	0.357047
	135	Control7	ATBx9	Control	ATBx	0.362437
	136	Control7	ATBx10	Control	ATBx	0.305569
	137	Control7	ATBx11	Control	ATBx	0.348653
	138	Control7	ATBx12	Control	ATBx	0.323884
	139	Control8	ATBx1	Control	ATBx	0.375918
	140	Control8	ATBx2	Control	ATBx	0.380934
	141	Control8	ATBx3	Control	ATBx	0.383472
	142	Control8	ATBx4	Control	ATBx	0.352873
	143	Control8	ATBx5	Control	ATBx	0.388348
	144	Control8	ATBx6	Control	ATBx	0.38601
	145	Control8	ATBx7	Control	ATBx	0.319652
	146	Control8	ATBx8	Control	ATBx	0.339528
	147	Control8	ATBx9	Control	ATBx	0.345914
	148	Control8	ATBx10	Control	ATBx	0.294492
	149	Control8	ATBx11	Control	ATBx	0.333234
	150	Control8	ATBx12	Control	ATBx	0.295996
	151	Control9	ATBx1	Control	ATBx	0.361661
	152	Control9	ATBx2	Control	ATBx	0.366863
	153	Control9	ATBx3	Control	ATBx	0.36769
	154	Control9	ATBx4	Control	ATBx	0.336426
	155	Control9	ATBx5	Control	ATBx	0.372837
	156	Control9	ATBx6	Control	ATBx	0.370405
	157	Control9	ATBx7	Control	ATBx	0.300353
	158	Control9	ATBx8	Control	ATBx	0.321296
	159	Control9	ATBx9	Control	ATBx	0.331969
	160	Control9	ATBx10	Control	ATBx	0.273355
	161	Control9	ATBx11	Control	ATBx	0.319688
	162	Control9	ATBx12	Control	ATBx	0.289149
	163	Control10	ATBx1	Control	ATBx	0.37872
	164	Control10	ATBx2	Control	ATBx	0.3838
	165	Control10	ATBx3	Control	ATBx	0.385676
	166	Control10	ATBx4	Control	ATBx	0.354435
	167	Control10	ATBx5	Control	ATBx	0.390592
	168	Control10	ATBx6	Control	ATBx	0.388364
	169	Control10	ATBx7	Control	ATBx	0.324301
	170	Control10	ATBx8	Control	ATBx	0.342893
	171	Control10	ATBx9	Control	ATBx	0.349029
	172	Control10	ATBx10	Control	ATBx	0.295208
	173	Control10	ATBx11	Control	ATBx	0.335689
	174	Control10	ATBx12	Control	ATBx	0.301189
	175	Control11	ATBx1	Control	ATBx	0.331998
	176	Control11	ATBx2	Control	ATBx	0.337101
	177	Control11	ATBx3	Control	ATBx	0.338473
	178	Control11	ATBx4	Control	ATBx	0.306082
	179	Control11	ATBx5	Control	ATBx	0.343063
	180	Control11	ATBx6	Control	ATBx	0.340541
	181	Control11	ATBx7	Control	ATBx	0.273248
	182	Control11	ATBx8	Control	ATBx	0.290773
	183	Control11	ATBx9	Control	ATBx	0.301739
	184	Control11	ATBx10	Control	ATBx	0.239544
	185	Control11	ATBx11	Control	ATBx	0.287094
	186	Control11	ATBx12	Control	ATBx	0.245227
	187	Control1	ATBxSAP1	Control	ATBxSAP	0.317176
	188	Control1	ATBxSAP2	Control	ATBxSAP	0.364547
	189	Control1	ATBxSAP3	Control	ATBxSAP	0.374732
	190	Control1	ATBxSAP4	Control	ATBxSAP	0.36317
	191	Control1	ATBxSAP5	Control	ATBxSAP	0.305587
	192	Control1	ATBxSAP6	Control	ATBxSAP	0.389165
	193	Control1	ATBxSAP7	Control	ATBxSAP	0.329232
	194	Control1	ATBxSAP8	Control	ATBxSAP	0.295647
	195	Control1	ATBxSAP9	Control	ATBxSAP	0.279815
	196	Control1	ATBxSAP10	Control	ATBxSAP	0.328089
	197	Control1	ATBxSAP11	Control	ATBxSAP	0.2513
	198	Control1	ATBxSAP12	Control	ATBxSAP	0.333799
	199	Control2	ATBxSAP1	Control	ATBxSAP	0.331072
	200	Control2	ATBxSAP2	Control	ATBxSAP	0.375083
	201	Control2	ATBxSAP3	Control	ATBxSAP	0.388713
	202	Control2	ATBxSAP4	Control	ATBxSAP	0.371615
	203	Control2	ATBxSAP5	Control	ATBxSAP	0.317178
	204	Control2	ATBxSAP6	Control	ATBxSAP	0.380233
	205	Control2	ATBxSAP7	Control	ATBxSAP	0.33535
	206	Control2	ATBxSAP8	Control	ATBxSAP	0.308012
	207	Control2	ATBxSAP9	Control	ATBxSAP	0.271347
	208	Control2	ATBxSAP10	Control	ATBxSAP	0.331178
	209	Control2	ATBxSAP11	Control	ATBxSAP	0.247125
	210	Control2	ATBxSAP12	Control	ATBxSAP	0.340185
	211	Control3	ATBxSAP1	Control	ATBxSAP	0.309649
	212	Control3	ATBxSAP2	Control	ATBxSAP	0.347141
	213	Control3	ATBxSAP3	Control	ATBxSAP	0.367145
	214	Control3	ATBxSAP4	Control	ATBxSAP	0.357854
	215	Control3	ATBxSAP5	Control	ATBxSAP	0.300426
	216	Control3	ATBxSAP6	Control	ATBxSAP	0.377632
	217	Control3	ATBxSAP7	Control	ATBxSAP	0.305317
	218	Control3	ATBxSAP8	Control	ATBxSAP	0.285771
	219	Control3	ATBxSAP9	Control	ATBxSAP	0.278262
	220	Control3	ATBxSAP10	Control	ATBxSAP	0.301478
	221	Control3	ATBxSAP11	Control	ATBxSAP	0.237476
	222	Control3	ATBxSAP12	Control	ATBxSAP	0.312832
	223	Control4	ATBxSAP1	Control	ATBxSAP	0.331455
	224	Control4	ATBxSAP2	Control	ATBxSAP	0.371652
	225	Control4	ATBxSAP3	Control	ATBxSAP	0.391506
	226	Control4	ATBxSAP4	Control	ATBxSAP	0.371079
	227	Control4	ATBxSAP5	Control	ATBxSAP	0.317398
	228	Control4	ATBxSAP6	Control	ATBxSAP	0.379039
	229	Control4	ATBxSAP7	Control	ATBxSAP	0.325325
	230	Control4	ATBxSAP8	Control	ATBxSAP	0.306784
	231	Control4	ATBxSAP9	Control	ATBxSAP	0.269815
	232	Control4	ATBxSAP10	Control	ATBxSAP	0.327564
	233	Control4	ATBxSAP11	Control	ATBxSAP	0.24677
	234	Control4	ATBxSAP12	Control	ATBxSAP	0.342842
	235	Control5	ATBxSAP1	Control	ATBxSAP	0.319257
	236	Control5	ATBxSAP2	Control	ATBxSAP	0.359486
	237	Control5	ATBxSAP3	Control	ATBxSAP	0.378456
	238	Control5	ATBxSAP4	Control	ATBxSAP	0.362358
	239	Control5	ATBxSAP5	Control	ATBxSAP	0.303006
	240	Control5	ATBxSAP6	Control	ATBxSAP	0.382655
	241	Control5	ATBxSAP7	Control	ATBxSAP	0.316762
	242	Control5	ATBxSAP8	Control	ATBxSAP	0.296662
	243	Control5	ATBxSAP9	Control	ATBxSAP	0.27515
	244	Control5	ATBxSAP10	Control	ATBxSAP	0.31748
	245	Control5	ATBxSAP11	Control	ATBxSAP	0.237535
	246	Control5	ATBxSAP12	Control	ATBxSAP	0.336985
	247	Control6	ATBxSAP1	Control	ATBxSAP	0.296691
	248	Control6	ATBxSAP2	Control	ATBxSAP	0.339637
	249	Control6	ATBxSAP3	Control	ATBxSAP	0.354562
	250	Control6	ATBxSAP4	Control	ATBxSAP	0.315486
	251	Control6	ATBxSAP5	Control	ATBxSAP	0.266818
	252	Control6	ATBxSAP6	Control	ATBxSAP	0.336016
	253	Control6	ATBxSAP7	Control	ATBxSAP	0.305345
	254	Control6	ATBxSAP8	Control	ATBxSAP	0.271228
	255	Control6	ATBxSAP9	Control	ATBxSAP	0.239658
	256	Control6	ATBxSAP10	Control	ATBxSAP	0.30542
	257	Control6	ATBxSAP11	Control	ATBxSAP	0.207721
	258	Control6	ATBxSAP12	Control	ATBxSAP	0.308801
	259	Control7	ATBxSAP1	Control	ATBxSAP	0.338242
	260	Control7	ATBxSAP2	Control	ATBxSAP	0.376973
	261	Control7	ATBxSAP3	Control	ATBxSAP	0.394175
	262	Control7	ATBxSAP4	Control	ATBxSAP	0.351895
	263	Control7	ATBxSAP5	Control	ATBxSAP	0.306402
	264	Control7	ATBxSAP6	Control	ATBxSAP	0.347047
	265	Control7	ATBxSAP7	Control	ATBxSAP	0.350455
	266	Control7	ATBxSAP8	Control	ATBxSAP	0.313375
	267	Control7	ATBxSAP9	Control	ATBxSAP	0.27425
	268	Control7	ATBxSAP10	Control	ATBxSAP	0.337234
	269	Control7	ATBxSAP11	Control	ATBxSAP	0.24674
	270	Control7	ATBxSAP12	Control	ATBxSAP	0.353578
	271	Control8	ATBxSAP1	Control	ATBxSAP	0.319484
	272	Control8	ATBxSAP2	Control	ATBxSAP	0.362815
	273	Control8	ATBxSAP3	Control	ATBxSAP	0.376749
	274	Control8	ATBxSAP4	Control	ATBxSAP	0.344592
	275	Control8	ATBxSAP5	Control	ATBxSAP	0.296591
	276	Control8	ATBxSAP6	Control	ATBxSAP	0.352293
	277	Control8	ATBxSAP7	Control	ATBxSAP	0.332795
	278	Control8	ATBxSAP8	Control	ATBxSAP	0.298745
	279	Control8	ATBxSAP9	Control	ATBxSAP	0.255673
	280	Control8	ATBxSAP10	Control	ATBxSAP	0.33235
	281	Control8	ATBxSAP11	Control	ATBxSAP	0.23675
	282	Control8	ATBxSAP12	Control	ATBxSAP	0.327676
	283	Control9	ATBxSAP1	Control	ATBxSAP	0.30499
	284	Control9	ATBxSAP2	Control	ATBxSAP	0.340197
	285	Control9	ATBxSAP3	Control	ATBxSAP	0.36211
	286	Control9	ATBxSAP4	Control	ATBxSAP	0.314045
	287	Control9	ATBxSAP5	Control	ATBxSAP	0.275154
	288	Control9	ATBxSAP6	Control	ATBxSAP	0.308241
	289	Control9	ATBxSAP7	Control	ATBxSAP	0.309004
	290	Control9	ATBxSAP8	Control	ATBxSAP	0.276911
	291	Control9	ATBxSAP9	Control	ATBxSAP	0.238339
	292	Control9	ATBxSAP10	Control	ATBxSAP	0.300564
	293	Control9	ATBxSAP11	Control	ATBxSAP	0.211633
	294	Control9	ATBxSAP12	Control	ATBxSAP	0.316002
	295	Control10	ATBxSAP1	Control	ATBxSAP	0.321957
	296	Control10	ATBxSAP2	Control	ATBxSAP	0.36428
	297	Control10	ATBxSAP3	Control	ATBxSAP	0.379826
	298	Control10	ATBxSAP4	Control	ATBxSAP	0.343828
	299	Control10	ATBxSAP5	Control	ATBxSAP	0.300041
	300	Control10	ATBxSAP6	Control	ATBxSAP	0.357089
	301	Control10	ATBxSAP7	Control	ATBxSAP	0.333526
	302	Control10	ATBxSAP8	Control	ATBxSAP	0.300776
	303	Control10	ATBxSAP9	Control	ATBxSAP	0.270804
	304	Control10	ATBxSAP10	Control	ATBxSAP	0.331185
	305	Control10	ATBxSAP11	Control	ATBxSAP	0.240313
	306	Control10	ATBxSAP12	Control	ATBxSAP	0.334207
	307	Control11	ATBxSAP1	Control	ATBxSAP	0.272332
	308	Control11	ATBxSAP2	Control	ATBxSAP	0.316816
	309	Control11	ATBxSAP3	Control	ATBxSAP	0.332841
	310	Control11	ATBxSAP4	Control	ATBxSAP	0.284142
	311	Control11	ATBxSAP5	Control	ATBxSAP	0.240869
	312	Control11	ATBxSAP6	Control	ATBxSAP	0.29971
	313	Control11	ATBxSAP7	Control	ATBxSAP	0.281833
	314	Control11	ATBxSAP8	Control	ATBxSAP	0.243529
	315	Control11	ATBxSAP9	Control	ATBxSAP	0.227042
	316	Control11	ATBxSAP10	Control	ATBxSAP	0.272697
	317	Control11	ATBxSAP11	Control	ATBxSAP	0.187297
	318	Control11	ATBxSAP12	Control	ATBxSAP	0.271352
	319	Control1	SAP1	Control	SAP	0.306894
	320	Control1	SAP2	Control	SAP	0.195218
	321	Control1	SAP3	Control	SAP	0.110675
	322	Control1	SAP4	Control	SAP	0.211517
	323	Control1	SAP5	Control	SAP	0.177879
	324	Control1	SAP6	Control	SAP	0.18038
	325	Control1	SAP7	Control	SAP	0.164069
	326	Control1	SAP8	Control	SAP	0.18649
	327	Control1	SAP9	Control	SAP	0.237107
	328	Control1	SAP10	Control	SAP	0.215414
	329	Control2	SAP1	Control	SAP	0.281951
	330	Control2	SAP2	Control	SAP	0.19479
	331	Control2	SAP3	Control	SAP	0.152598
	332	Control2	SAP4	Control	SAP	0.213639
	333	Control2	SAP5	Control	SAP	0.140616
	334	Control2	SAP6	Control	SAP	0.192475
	335	Control2	SAP7	Control	SAP	0.159818
	336	Control2	SAP8	Control	SAP	0.195233
	337	Control2	SAP9	Control	SAP	0.257706
	338	Control2	SAP10	Control	SAP	0.183093
	339	Control3	SAP1	Control	SAP	0.320336
	340	Control3	SAP2	Control	SAP	0.216916
	341	Control3	SAP3	Control	SAP	0.120828
	342	Control3	SAP4	Control	SAP	0.194121
	343	Control3	SAP5	Control	SAP	0.150557
	344	Control3	SAP6	Control	SAP	0.186904
	345	Control3	SAP7	Control	SAP	0.139423
	346	Control3	SAP8	Control	SAP	0.16675
	347	Control3	SAP9	Control	SAP	0.224067
	348	Control3	SAP10	Control	SAP	0.230606
	349	Control4	SAP1	Control	SAP	0.239785
	350	Control4	SAP2	Control	SAP	0.146741
	351	Control4	SAP3	Control	SAP	0.119433
	352	Control4	SAP4	Control	SAP	0.167608
	353	Control4	SAP5	Control	SAP	0.144452
	354	Control4	SAP6	Control	SAP	0.145401
	355	Control4	SAP7	Control	SAP	0.172929
	356	Control4	SAP8	Control	SAP	0.211641
	357	Control4	SAP9	Control	SAP	0.213173
	358	Control4	SAP10	Control	SAP	0.150653
	359	Control5	SAP1	Control	SAP	0.284034
	360	Control5	SAP2	Control	SAP	0.180476
	361	Control5	SAP3	Control	SAP	0.0992743
	362	Control5	SAP4	Control	SAP	0.174535
	363	Control5	SAP5	Control	SAP	0.154406
	364	Control5	SAP6	Control	SAP	0.154194
	365	Control5	SAP7	Control	SAP	0.141145
	366	Control5	SAP8	Control	SAP	0.183075
	367	Control5	SAP9	Control	SAP	0.209113
	368	Control5	SAP10	Control	SAP	0.197526
	369	Control6	SAP1	Control	SAP	0.323735
	370	Control6	SAP2	Control	SAP	0.211674
	371	Control6	SAP3	Control	SAP	0.150781
	372	Control6	SAP4	Control	SAP	0.218836
	373	Control6	SAP5	Control	SAP	0.150294
	374	Control6	SAP6	Control	SAP	0.172617
	375	Control6	SAP7	Control	SAP	0.117216
	376	Control6	SAP8	Control	SAP	0.170386
	377	Control6	SAP9	Control	SAP	0.241995
	378	Control6	SAP10	Control	SAP	0.202214
	379	Control7	SAP1	Control	SAP	0.288319
	380	Control7	SAP2	Control	SAP	0.232483
	381	Control7	SAP3	Control	SAP	0.198676
	382	Control7	SAP4	Control	SAP	0.248328
	383	Control7	SAP5	Control	SAP	0.154395
	384	Control7	SAP6	Control	SAP	0.212726
	385	Control7	SAP7	Control	SAP	0.157188
	386	Control7	SAP8	Control	SAP	0.214104
	387	Control7	SAP9	Control	SAP	0.276346
	388	Control7	SAP10	Control	SAP	0.214403
	389	Control8	SAP1	Control	SAP	0.231262
	390	Control8	SAP2	Control	SAP	0.180765
	391	Control8	SAP3	Control	SAP	0.127977
	392	Control8	SAP4	Control	SAP	0.199344
	393	Control8	SAP5	Control	SAP	0.113088
	394	Control8	SAP6	Control	SAP	0.167949
	395	Control8	SAP7	Control	SAP	0.163053
	396	Control8	SAP8	Control	SAP	0.17891
	397	Control8	SAP9	Control	SAP	0.231988
	398	Control8	SAP10	Control	SAP	0.166466
	399	Control9	SAP1	Control	SAP	0.284004
	400	Control9	SAP2	Control	SAP	0.173157
	401	Control9	SAP3	Control	SAP	0.160187
	402	Control9	SAP4	Control	SAP	0.192233
	403	Control9	SAP5	Control	SAP	0.117698
	404	Control9	SAP6	Control	SAP	0.141819
	405	Control9	SAP7	Control	SAP	0.124213
	406	Control9	SAP8	Control	SAP	0.164208
	407	Control9	SAP9	Control	SAP	0.211468
	408	Control9	SAP10	Control	SAP	0.163235
	409	Control10	SAP1	Control	SAP	0.350092
	410	Control10	SAP2	Control	SAP	0.241474
	411	Control10	SAP3	Control	SAP	0.179739
	412	Control10	SAP4	Control	SAP	0.25439
	413	Control10	SAP5	Control	SAP	0.178244
	414	Control10	SAP6	Control	SAP	0.20665
	415	Control10	SAP7	Control	SAP	0.149862
	416	Control10	SAP8	Control	SAP	0.188958
	417	Control10	SAP9	Control	SAP	0.265812
	418	Control10	SAP10	Control	SAP	0.228157
	419	Control11	SAP1	Control	SAP	0.339969
	420	Control11	SAP2	Control	SAP	0.219777
	421	Control11	SAP3	Control	SAP	0.150672
	422	Control11	SAP4	Control	SAP	0.23628
	423	Control11	SAP5	Control	SAP	0.158753
	424	Control11	SAP6	Control	SAP	0.184181
	425	Control11	SAP7	Control	SAP	0.12581
	426	Control11	SAP8	Control	SAP	0.16698
	427	Control11	SAP9	Control	SAP	0.239095
	428	Control11	SAP10	Control	SAP	0.214744
	0	SAP2	SAP1	SAP	SAP	0.187626
	1	SAP3	SAP1	SAP	SAP	0.242182
	2	SAP3	SAP2	SAP	SAP	0.122596
	3	SAP4	SAP1	SAP	SAP	0.160603
	4	SAP4	SAP2	SAP	SAP	0.101396
	5	SAP4	SAP3	SAP	SAP	0.134455
	6	SAP5	SAP1	SAP	SAP	0.2481
	7	SAP5	SAP2	SAP	SAP	0.152864
	8	SAP5	SAP3	SAP	SAP	0.124296
	9	SAP5	SAP4	SAP	SAP	0.151694
	10	SAP6	SAP1	SAP	SAP	0.214279
	11	SAP6	SAP2	SAP	SAP	0.100974
	12	SAP6	SAP3	SAP	SAP	0.112421
	13	SAP6	SAP4	SAP	SAP	0.100473
	14	SAP6	SAP5	SAP	SAP	0.109909
	15	SAP7	SAP1	SAP	SAP	0.301376
	16	SAP7	SAP2	SAP	SAP	0.185954
	17	SAP7	SAP3	SAP	SAP	0.133984
	18	SAP7	SAP4	SAP	SAP	0.176256
	19	SAP7	SAP5	SAP	SAP	0.0826818
	20	SAP7	SAP6	SAP	SAP	0.11249
	21	SAP8	SAP1	SAP	SAP	0.296799
	22	SAP8	SAP2	SAP	SAP	0.195052
	23	SAP8	SAP3	SAP	SAP	0.138172
	24	SAP8	SAP4	SAP	SAP	0.190461
	25	SAP8	SAP5	SAP	SAP	0.12674
	26	SAP8	SAP6	SAP	SAP	0.158784
	27	SAP8	SAP7	SAP	SAP	0.140851
	28	SAP9	SAP1	SAP	SAP	0.1967
	29	SAP9	SAP2	SAP	SAP	0.14071
	30	SAP9	SAP3	SAP	SAP	0.154967
	31	SAP9	SAP4	SAP	SAP	0.0830036
	32	SAP9	SAP5	SAP	SAP	0.178629
	33	SAP9	SAP6	SAP	SAP	0.110805
	34	SAP9	SAP7	SAP	SAP	0.185219
	35	SAP9	SAP8	SAP	SAP	0.149557
	36	SAP10	SAP1	SAP	SAP	0.195437
	37	SAP10	SAP2	SAP	SAP	0.132335
	38	SAP10	SAP3	SAP	SAP	0.15934
	39	SAP10	SAP4	SAP	SAP	0.13929
	40	SAP10	SAP5	SAP	SAP	0.139068
	41	SAP10	SAP6	SAP	SAP	0.111677
	42	SAP10	SAP7	SAP	SAP	0.194863
	43	SAP10	SAP8	SAP	SAP	0.159578
	44	SAP10	SAP9	SAP	SAP	0.145649
	45	SAP1	ATBx1	SAP	ATBx	0.360801
	46	SAP1	ATBx2	SAP	ATBx	0.365041
	47	SAP1	ATBx3	SAP	ATBx	0.370171
	48	SAP1	ATBx4	SAP	ATBx	0.348775
	49	SAP1	ATBx5	SAP	ATBx	0.375203
	50	SAP1	ATBx6	SAP	ATBx	0.377751
	51	SAP1	ATBx7	SAP	ATBx	0.320926
	52	SAP1	ATBx8	SAP	ATBx	0.340879
	53	SAP1	ATBx9	SAP	ATBx	0.336288
	54	SAP1	ATBx10	SAP	ATBx	0.330032
	55	SAP1	ATBx11	SAP	ATBx	0.337802
	56	SAP1	ATBx12	SAP	ATBx	0.334917
	57	SAP2	ATBx1	SAP	ATBx	0.338615
	58	SAP2	ATBx2	SAP	ATBx	0.343573
	59	SAP2	ATBx3	SAP	ATBx	0.347344
	60	SAP2	ATBx4	SAP	ATBx	0.30034
	61	SAP2	ATBx5	SAP	ATBx	0.352096
	62	SAP2	ATBx6	SAP	ATBx	0.351641
	63	SAP2	ATBx7	SAP	ATBx	0.283045
	64	SAP2	ATBx8	SAP	ATBx	0.304197
	65	SAP2	ATBx9	SAP	ATBx	0.302542
	66	SAP2	ATBx10	SAP	ATBx	0.253741
	67	SAP2	ATBx11	SAP	ATBx	0.283578
	68	SAP2	ATBx12	SAP	ATBx	0.26064
	69	SAP3	ATBx1	SAP	ATBx	0.320841
	70	SAP3	ATBx2	SAP	ATBx	0.325532
	71	SAP3	ATBx3	SAP	ATBx	0.327738
	72	SAP3	ATBx4	SAP	ATBx	0.296759
	73	SAP3	ATBx5	SAP	ATBx	0.332618
	74	SAP3	ATBx6	SAP	ATBx	0.334082
	75	SAP3	ATBx7	SAP	ATBx	0.272038
	76	SAP3	ATBx8	SAP	ATBx	0.287939
	77	SAP3	ATBx9	SAP	ATBx	0.289147
	78	SAP3	ATBx10	SAP	ATBx	0.247348
	79	SAP3	ATBx11	SAP	ATBx	0.275694
	80	SAP3	ATBx12	SAP	ATBx	0.240682
	81	SAP4	ATBx1	SAP	ATBx	0.329434
	82	SAP4	ATBx2	SAP	ATBx	0.334179
	83	SAP4	ATBx3	SAP	ATBx	0.339213
	84	SAP4	ATBx4	SAP	ATBx	0.313233
	85	SAP4	ATBx5	SAP	ATBx	0.343979
	86	SAP4	ATBx6	SAP	ATBx	0.34388
	87	SAP4	ATBx7	SAP	ATBx	0.272389
	88	SAP4	ATBx8	SAP	ATBx	0.300185
	89	SAP4	ATBx9	SAP	ATBx	0.301033
	90	SAP4	ATBx10	SAP	ATBx	0.267996
	91	SAP4	ATBx11	SAP	ATBx	0.299498
	92	SAP4	ATBx12	SAP	ATBx	0.278862
	93	SAP5	ATBx1	SAP	ATBx	0.339776
	94	SAP5	ATBx2	SAP	ATBx	0.345076
	95	SAP5	ATBx3	SAP	ATBx	0.348786
	96	SAP5	ATBx4	SAP	ATBx	0.314658
	97	SAP5	ATBx5	SAP	ATBx	0.354212
	98	SAP5	ATBx6	SAP	ATBx	0.351387
	99	SAP5	ATBx7	SAP	ATBx	0.267641
	100	SAP5	ATBx8	SAP	ATBx	0.298809
	101	SAP5	ATBx9	SAP	ATBx	0.306226
	102	SAP5	ATBx10	SAP	ATBx	0.241571
	103	SAP5	ATBx11	SAP	ATBx	0.296293
	104	SAP5	ATBx12	SAP	ATBx	0.254391
	105	SAP6	ATBx1	SAP	ATBx	0.338673
	106	SAP6	ATBx2	SAP	ATBx	0.343837
	107	SAP6	ATBx3	SAP	ATBx	0.347652
	108	SAP6	ATBx4	SAP	ATBx	0.310824
	109	SAP6	ATBx5	SAP	ATBx	0.3532
	110	SAP6	ATBx6	SAP	ATBx	0.3499
	111	SAP6	ATBx7	SAP	ATBx	0.267682
	112	SAP6	ATBx8	SAP	ATBx	0.301341
	113	SAP6	ATBx9	SAP	ATBx	0.305574
	114	SAP6	ATBx10	SAP	ATBx	0.241676
	115	SAP6	ATBx11	SAP	ATBx	0.290479
	116	SAP6	ATBx12	SAP	ATBx	0.255067
	117	SAP7	ATBx1	SAP	ATBx	0.336289
	118	SAP7	ATBx2	SAP	ATBx	0.3415
	119	SAP7	ATBx3	SAP	ATBx	0.3453
	120	SAP7	ATBx4	SAP	ATBx	0.308962
	121	SAP7	ATBx5	SAP	ATBx	0.350719
	122	SAP7	ATBx6	SAP	ATBx	0.347213
	123	SAP7	ATBx7	SAP	ATBx	0.263132
	124	SAP7	ATBx8	SAP	ATBx	0.298629
	125	SAP7	ATBx9	SAP	ATBx	0.301465
	126	SAP7	ATBx10	SAP	ATBx	0.232862
	127	SAP7	ATBx11	SAP	ATBx	0.289657
	128	SAP7	ATBx12	SAP	ATBx	0.246297
	129	SAP8	ATBx1	SAP	ATBx	0.290734
	130	SAP8	ATBx2	SAP	ATBx	0.295572
	131	SAP8	ATBx3	SAP	ATBx	0.29711
	132	SAP8	ATBx4	SAP	ATBx	0.263843
	133	SAP8	ATBx5	SAP	ATBx	0.302492
	134	SAP8	ATBx6	SAP	ATBx	0.298162
	135	SAP8	ATBx7	SAP	ATBx	0.232694
	136	SAP8	ATBx8	SAP	ATBx	0.254798
	137	SAP8	ATBx9	SAP	ATBx	0.256742
	138	SAP8	ATBx10	SAP	ATBx	0.220425
	139	SAP8	ATBx11	SAP	ATBx	0.252158
	140	SAP8	ATBx12	SAP	ATBx	0.228594
	141	SAP9	ATBx1	SAP	ATBx	0.322295
	142	SAP9	ATBx2	SAP	ATBx	0.327308
	143	SAP9	ATBx3	SAP	ATBx	0.331387
	144	SAP9	ATBx4	SAP	ATBx	0.300788
	145	SAP9	ATBx5	SAP	ATBx	0.336388
	146	SAP9	ATBx6	SAP	ATBx	0.331562
	147	SAP9	ATBx7	SAP	ATBx	0.253693
	148	SAP9	ATBx8	SAP	ATBx	0.288913
	149	SAP9	ATBx9	SAP	ATBx	0.288478
	150	SAP9	ATBx10	SAP	ATBx	0.25561
	151	SAP9	ATBx11	SAP	ATBx	0.284253
	152	SAP9	ATBx12	SAP	ATBx	0.265481
	153	SAP10	ATBx1	SAP	ATBx	0.355203
	154	SAP10	ATBx2	SAP	ATBx	0.359911
	155	SAP10	ATBx3	SAP	ATBx	0.361205
	156	SAP10	ATBx4	SAP	ATBx	0.332003
	157	SAP10	ATBx5	SAP	ATBx	0.366562
	158	SAP10	ATBx6	SAP	ATBx	0.363525
	159	SAP10	ATBx7	SAP	ATBx	0.298314
	160	SAP10	ATBx8	SAP	ATBx	0.324908
	161	SAP10	ATBx9	SAP	ATBx	0.324949
	162	SAP10	ATBx10	SAP	ATBx	0.27743
	163	SAP10	ATBx11	SAP	ATBx	0.312223
	164	SAP10	ATBx12	SAP	ATBx	0.297014
	165	SAP1	ATBxSAP1	SAP	ATBxSAP	0.321064
	166	SAP1	ATBxSAP2	SAP	ATBxSAP	0.351315
	167	SAP1	ATBxSAP3	SAP	ATBxSAP	0.364881
	168	SAP1	ATBxSAP4	SAP	ATBxSAP	0.372197
	169	SAP1	ATBxSAP5	SAP	ATBxSAP	0.33373
	170	SAP1	ATBxSAP6	SAP	ATBxSAP	0.408469
	171	SAP1	ATBxSAP7	SAP	ATBxSAP	0.333726
	172	SAP1	ATBxSAP8	SAP	ATBxSAP	0.30993
	173	SAP1	ATBxSAP9	SAP	ATBxSAP	0.311599
	174	SAP1	ATBxSAP10	SAP	ATBxSAP	0.325186
	175	SAP1	ATBxSAP11	SAP	ATBxSAP	0.317764
	176	SAP1	ATBxSAP12	SAP	ATBxSAP	0.347227
	177	SAP2	ATBxSAP1	SAP	ATBxSAP	0.283144
	178	SAP2	ATBxSAP2	SAP	ATBxSAP	0.328411
	179	SAP2	ATBxSAP3	SAP	ATBxSAP	0.341126
	180	SAP2	ATBxSAP4	SAP	ATBxSAP	0.314633
	181	SAP2	ATBxSAP5	SAP	ATBxSAP	0.260086
	182	SAP2	ATBxSAP6	SAP	ATBxSAP	0.330159
	183	SAP2	ATBxSAP7	SAP	ATBxSAP	0.294811
	184	SAP2	ATBxSAP8	SAP	ATBxSAP	0.264077
	185	SAP2	ATBxSAP9	SAP	ATBxSAP	0.222126
	186	SAP2	ATBxSAP10	SAP	ATBxSAP	0.291883
	187	SAP2	ATBxSAP11	SAP	ATBxSAP	0.207061
	188	SAP2	ATBxSAP12	SAP	ATBxSAP	0.305375
	189	SAP3	ATBxSAP1	SAP	ATBxSAP	0.265032
	190	SAP3	ATBxSAP2	SAP	ATBxSAP	0.313465
	191	SAP3	ATBxSAP3	SAP	ATBxSAP	0.322608
	192	SAP3	ATBxSAP4	SAP	ATBxSAP	0.311157
	193	SAP3	ATBxSAP5	SAP	ATBxSAP	0.252435
	194	SAP3	ATBxSAP6	SAP	ATBxSAP	0.338139
	195	SAP3	ATBxSAP7	SAP	ATBxSAP	0.279996
	196	SAP3	ATBxSAP8	SAP	ATBxSAP	0.245162
	197	SAP3	ATBxSAP9	SAP	ATBxSAP	0.232072
	198	SAP3	ATBxSAP10	SAP	ATBxSAP	0.278628
	199	SAP3	ATBxSAP11	SAP	ATBxSAP	0.202288
	200	SAP3	ATBxSAP12	SAP	ATBxSAP	0.276885
	201	SAP4	ATBxSAP1	SAP	ATBxSAP	0.284417
	202	SAP4	ATBxSAP2	SAP	ATBxSAP	0.302675
	203	SAP4	ATBxSAP3	SAP	ATBxSAP	0.331922
	204	SAP4	ATBxSAP4	SAP	ATBxSAP	0.308705
	205	SAP4	ATBxSAP5	SAP	ATBxSAP	0.26714
	206	SAP4	ATBxSAP6	SAP	ATBxSAP	0.329565
	207	SAP4	ATBxSAP7	SAP	ATBxSAP	0.285925
	208	SAP4	ATBxSAP8	SAP	ATBxSAP	0.265628
	209	SAP4	ATBxSAP9	SAP	ATBxSAP	0.237373
	210	SAP4	ATBxSAP10	SAP	ATBxSAP	0.282425
	211	SAP4	ATBxSAP11	SAP	ATBxSAP	0.219958
	212	SAP4	ATBxSAP12	SAP	ATBxSAP	0.302523
	213	SAP5	ATBxSAP1	SAP	ATBxSAP	0.282957
	214	SAP5	ATBxSAP2	SAP	ATBxSAP	0.311142
	215	SAP5	ATBxSAP3	SAP	ATBxSAP	0.340751
	216	SAP5	ATBxSAP4	SAP	ATBxSAP	0.292468
	217	SAP5	ATBxSAP5	SAP	ATBxSAP	0.245626
	218	SAP5	ATBxSAP6	SAP	ATBxSAP	0.288604
	219	SAP5	ATBxSAP7	SAP	ATBxSAP	0.280417
	220	SAP5	ATBxSAP8	SAP	ATBxSAP	0.258708
	221	SAP5	ATBxSAP9	SAP	ATBxSAP	0.200906
	222	SAP5	ATBxSAP10	SAP	ATBxSAP	0.280745
	223	SAP5	ATBxSAP11	SAP	ATBxSAP	0.177936
	224	SAP5	ATBxSAP12	SAP	ATBxSAP	0.293551
	225	SAP6	ATBxSAP1	SAP	ATBxSAP	0.281398
	226	SAP6	ATBxSAP2	SAP	ATBxSAP	0.307727
	227	SAP6	ATBxSAP3	SAP	ATBxSAP	0.339198
	228	SAP6	ATBxSAP4	SAP	ATBxSAP	0.285708
	229	SAP6	ATBxSAP5	SAP	ATBxSAP	0.241767
	230	SAP6	ATBxSAP6	SAP	ATBxSAP	0.296683
	231	SAP6	ATBxSAP7	SAP	ATBxSAP	0.278262
	232	SAP6	ATBxSAP8	SAP	ATBxSAP	0.255779
	233	SAP6	ATBxSAP9	SAP	ATBxSAP	0.214153
	234	SAP6	ATBxSAP10	SAP	ATBxSAP	0.271469
	235	SAP6	ATBxSAP11	SAP	ATBxSAP	0.177594
	236	SAP6	ATBxSAP12	SAP	ATBxSAP	0.292597
	237	SAP7	ATBxSAP1	SAP	ATBxSAP	0.276877
	238	SAP7	ATBxSAP2	SAP	ATBxSAP	0.30317
	239	SAP7	ATBxSAP3	SAP	ATBxSAP	0.336951
	240	SAP7	ATBxSAP4	SAP	ATBxSAP	0.281829
	241	SAP7	ATBxSAP5	SAP	ATBxSAP	0.23495
	242	SAP7	ATBxSAP6	SAP	ATBxSAP	0.289722
	243	SAP7	ATBxSAP7	SAP	ATBxSAP	0.272754
	244	SAP7	ATBxSAP8	SAP	ATBxSAP	0.24321
	245	SAP7	ATBxSAP9	SAP	ATBxSAP	0.207539
	246	SAP7	ATBxSAP10	SAP	ATBxSAP	0.265586
	247	SAP7	ATBxSAP11	SAP	ATBxSAP	0.163643
	248	SAP7	ATBxSAP12	SAP	ATBxSAP	0.277143
	249	SAP8	ATBxSAP1	SAP	ATBxSAP	0.23247
	250	SAP8	ATBxSAP2	SAP	ATBxSAP	0.273628
	251	SAP8	ATBxSAP3	SAP	ATBxSAP	0.29101
	252	SAP8	ATBxSAP4	SAP	ATBxSAP	0.240049
	253	SAP8	ATBxSAP5	SAP	ATBxSAP	0.202989
	254	SAP8	ATBxSAP6	SAP	ATBxSAP	0.268812
	255	SAP8	ATBxSAP7	SAP	ATBxSAP	0.25349
	256	SAP8	ATBxSAP8	SAP	ATBxSAP	0.2247
	257	SAP8	ATBxSAP9	SAP	ATBxSAP	0.20704
	258	SAP8	ATBxSAP10	SAP	ATBxSAP	0.234498
	259	SAP8	ATBxSAP11	SAP	ATBxSAP	0.182158
	260	SAP8	ATBxSAP12	SAP	ATBxSAP	0.258736
	261	SAP9	ATBxSAP1	SAP	ATBxSAP	0.266808
	262	SAP9	ATBxSAP2	SAP	ATBxSAP	0.288875
	263	SAP9	ATBxSAP3	SAP	ATBxSAP	0.322642
	264	SAP9	ATBxSAP4	SAP	ATBxSAP	0.278261
	265	SAP9	ATBxSAP5	SAP	ATBxSAP	0.235556
	266	SAP9	ATBxSAP6	SAP	ATBxSAP	0.301366
	267	SAP9	ATBxSAP7	SAP	ATBxSAP	0.280573
	268	SAP9	ATBxSAP8	SAP	ATBxSAP	0.258662
	269	SAP9	ATBxSAP9	SAP	ATBxSAP	0.249247
	270	SAP9	ATBxSAP10	SAP	ATBxSAP	0.265791
	271	SAP9	ATBxSAP11	SAP	ATBxSAP	0.225314
	272	SAP9	ATBxSAP12	SAP	ATBxSAP	0.289257
	273	SAP10	ATBxSAP1	SAP	ATBxSAP	0.301497
	274	SAP10	ATBxSAP2	SAP	ATBxSAP	0.337083
	275	SAP10	ATBxSAP3	SAP	ATBxSAP	0.356161
	276	SAP10	ATBxSAP4	SAP	ATBxSAP	0.271782
	277	SAP10	ATBxSAP5	SAP	ATBxSAP	0.266249
	278	SAP10	ATBxSAP6	SAP	ATBxSAP	0.285976
	279	SAP10	ATBxSAP7	SAP	ATBxSAP	0.316595
	280	SAP10	ATBxSAP8	SAP	ATBxSAP	0.294367
	281	SAP10	ATBxSAP9	SAP	ATBxSAP	0.240488
	282	SAP10	ATBxSAP10	SAP	ATBxSAP	0.301802
	283	SAP10	ATBxSAP11	SAP	ATBxSAP	0.235365
	284	SAP10	ATBxSAP12	SAP	ATBxSAP	0.328199
	285	SAP1	Control1	SAP	Control	0.306894
	286	SAP1	Control2	SAP	Control	0.281951
	287	SAP1	Control3	SAP	Control	0.320336
	288	SAP1	Control4	SAP	Control	0.239785
	289	SAP1	Control5	SAP	Control	0.284034
	290	SAP1	Control6	SAP	Control	0.323735
	291	SAP1	Control7	SAP	Control	0.288319
	292	SAP1	Control8	SAP	Control	0.231262
	293	SAP1	Control9	SAP	Control	0.284004
	294	SAP1	Control10	SAP	Control	0.350092
	295	SAP1	Control11	SAP	Control	0.339969
	296	SAP2	Control1	SAP	Control	0.195218
	297	SAP2	Control2	SAP	Control	0.19479
	298	SAP2	Control3	SAP	Control	0.216916
	299	SAP2	Control4	SAP	Control	0.146741
	300	SAP2	Control5	SAP	Control	0.180476
	301	SAP2	Control6	SAP	Control	0.211674
	302	SAP2	Control7	SAP	Control	0.232483
	303	SAP2	Control8	SAP	Control	0.180765
	304	SAP2	Control9	SAP	Control	0.173157
	305	SAP2	Control10	SAP	Control	0.241474
	306	SAP2	Control11	SAP	Control	0.219777
	307	SAP3	Control1	SAP	Control	0.110675
	308	SAP3	Control2	SAP	Control	0.152598
	309	SAP3	Control3	SAP	Control	0.120828
	310	SAP3	Control4	SAP	Control	0.119433
	311	SAP3	Control5	SAP	Control	0.0992743
	312	SAP3	Control6	SAP	Control	0.150781
	313	SAP3	Control7	SAP	Control	0.198676
	314	SAP3	Control8	SAP	Control	0.127977
	315	SAP3	Control9	SAP	Control	0.160187
	316	SAP3	Control10	SAP	Control	0.179739
	317	SAP3	Control11	SAP	Control	0.150672
	318	SAP4	Control1	SAP	Control	0.211517
	319	SAP4	Control2	SAP	Control	0.213639
	320	SAP4	Control3	SAP	Control	0.194121
	321	SAP4	Control4	SAP	Control	0.167608
	322	SAP4	Control5	SAP	Control	0.174535
	323	SAP4	Control6	SAP	Control	0.218836
	324	SAP4	Control7	SAP	Control	0.248328
	325	SAP4	Control8	SAP	Control	0.199344
	326	SAP4	Control9	SAP	Control	0.192233
	327	SAP4	Control10	SAP	Control	0.25439
	328	SAP4	Control11	SAP	Control	0.23628
	329	SAP5	Control1	SAP	Control	0.177879
	330	SAP5	Control2	SAP	Control	0.140616
	331	SAP5	Control3	SAP	Control	0.150557
	332	SAP5	Control4	SAP	Control	0.144452
	333	SAP5	Control5	SAP	Control	0.154406
	334	SAP5	Control6	SAP	Control	0.150294
	335	SAP5	Control7	SAP	Control	0.154395
	336	SAP5	Control8	SAP	Control	0.113088
	337	SAP5	Control9	SAP	Control	0.117698
	338	SAP5	Control10	SAP	Control	0.178244
	339	SAP5	Control11	SAP	Control	0.158753
	340	SAP6	Control1	SAP	Control	0.18038
	341	SAP6	Control2	SAP	Control	0.192475
	342	SAP6	Control3	SAP	Control	0.186904
	343	SAP6	Control4	SAP	Control	0.145401
	344	SAP6	Control5	SAP	Control	0.154194
	345	SAP6	Control6	SAP	Control	0.172617
	346	SAP6	Control7	SAP	Control	0.212726
	347	SAP6	Control8	SAP	Control	0.167949
	348	SAP6	Control9	SAP	Control	0.141819
	349	SAP6	Control10	SAP	Control	0.20665
	350	SAP6	Control11	SAP	Control	0.184181
	351	SAP7	Control1	SAP	Control	0.164069
	352	SAP7	Control2	SAP	Control	0.159818
	353	SAP7	Control3	SAP	Control	0.139423
	354	SAP7	Control4	SAP	Control	0.172929
	355	SAP7	Control5	SAP	Control	0.141145
	356	SAP7	Control6	SAP	Control	0.117216
	357	SAP7	Control7	SAP	Control	0.157188
	358	SAP7	Control8	SAP	Control	0.163053
	359	SAP7	Control9	SAP	Control	0.124213
	360	SAP7	Control10	SAP	Control	0.149862
	361	SAP7	Control11	SAP	Control	0.12581
	362	SAP8	Control1	SAP	Control	0.18649
	363	SAP8	Control2	SAP	Control	0.195233
	364	SAP8	Control3	SAP	Control	0.16675
	365	SAP8	Control4	SAP	Control	0.211641
	366	SAP8	Control5	SAP	Control	0.183075
	367	SAP8	Control6	SAP	Control	0.170386
	368	SAP8	Control7	SAP	Control	0.214104
	369	SAP8	Control8	SAP	Control	0.17891
	370	SAP8	Control9	SAP	Control	0.164208
	371	SAP8	Control10	SAP	Control	0.188958
	372	SAP8	Control11	SAP	Control	0.16698
	373	SAP9	Control1	SAP	Control	0.237107
	374	SAP9	Control2	SAP	Control	0.257706
	375	SAP9	Control3	SAP	Control	0.224067
	376	SAP9	Control4	SAP	Control	0.213173
	377	SAP9	Control5	SAP	Control	0.209113
	378	SAP9	Control6	SAP	Control	0.241995
	379	SAP9	Control7	SAP	Control	0.276346
	380	SAP9	Control8	SAP	Control	0.231988
	381	SAP9	Control9	SAP	Control	0.211468
	382	SAP9	Control10	SAP	Control	0.265812
	383	SAP9	Control11	SAP	Control	0.239095
	384	SAP10	Control1	SAP	Control	0.215414
	385	SAP10	Control2	SAP	Control	0.183093
	386	SAP10	Control3	SAP	Control	0.230606
	387	SAP10	Control4	SAP	Control	0.150653
	388	SAP10	Control5	SAP	Control	0.197526
	389	SAP10	Control6	SAP	Control	0.202214
	390	SAP10	Control7	SAP	Control	0.214403
	391	SAP10	Control8	SAP	Control	0.166466
	392	SAP10	Control9	SAP	Control	0.163235
	393	SAP10	Control10	SAP	Control	0.228157
	394	SAP10	Control11	SAP	Control	0.214744

## Sheet: Supplementary Figure 2
Supplementary Fig. 2a	LEFSe analysis
	Microbial names	Logarithm value	Groups	LDA value	p value	Note
	p__Firmicutes	5.72691	BC	5.35141	4.86501e-05	Top10
	p__Acidobacteriota	2.86315	ATBx	3.8652	0.0221068
	p__Coprothermobacterota	1.15663	ATBx	5.30687	0.0404815
	p__Verrucomicrobiota	5.31364	BC	4.99477	4.86501e-05	Top10
	p__Desulfobacterota	4.87296	BC	4.49859	0.000105587	Top10
	p__Actinobacteriota	4.11592	BC	3.62326	0.0227747	Top10
	p__Deferribacteres	3.45053	BC	3.56688	0.000173833	Top10
	p__Gemmatimonadetes	2.46606	ATBx	4.47074	0.00201248
	p__Bacteroidota	4.97513	BC	4.55047	0.000173833	Top10
	p__Chloroflexi	2.7283	ATBx	4.29105	0.0125387
	p__Proteobacteria	5.92899	ATBx	5.59729	4.86501e-05	Top10
Supplementary Fig. 2b	LEFSe analysis
	Microbial names	Logarithm value	Groups	LDA value	p value	Note
	p__Firmicutes	5.72691	BC	5.28055	4.86501e-05	Top10
	p__Cyanobacteria	4.24364	ATBx+SAP	3.91198	0.0267157
	p__Coprothermobacterota	1.85568	ATBx+SAP	4.09891	0.00856468
	p__Verrucomicrobiota	5.31364	BC	4.94014	4.86501e-05	Top10
	p__Desulfobacterota	4.87296	BC	4.33936	0.00256352	Top10
	p__Gemmatimonadota	1.46321	ATBx+SAP	4.55064	0.0190638
	p__Kapabacteria	1.64402	ATBx+SAP	4.1566	0.0404815
	p__Bacteroidota	4.97513	BC	4.40198	0.00561323	Top10
	p__Proteobacteria	5.84034	ATBx+SAP	5.49914	4.86501e-05	Top10
Supplementary Fig. 2c	LEFSe analysis
	Microbial names	Logarithm value	Groups	LDA value	p value	Note
	f__Desulfovibrionaceae	4.91815	BC	4.5017	0.000357454	Top10
	f__Anaerofustaceae	1.42318	BC	4.35952	0.00151318
	f__Eggerthellaceae	4.0878	BC	3.66776	0.00256352	Top10
	f__Amb_16S_1323	1.39563	ATBx	3.56969	0.0404815
	f__Enterobacteriaceae	5.92238	ATBx	5.59215	4.86501e-05	Top10
	f__Lachnospiraceae	5.5091	BC	5.15548	4.86501e-05	Top10
	f__Anaerolineaceae	1.66838	ATBx	3.92244	0.0173796
	f__Micropepsaceae	1.30418	ATBx	3.67939	0.0404815
	f__Promicromonosporaceae	1.23489	ATBx	4.30026	0.0404815
	f__Azospirillaceae	1.34141	ATBx	3.9935	0.0234626
	f__Paenibacillaceae	1.80696	ATBx	3.57676	0.0042969
	f__unidentified_Rhizobiales	1.04026	ATBx	4.3221	0.0190638
	f__Acidobacteriaceae__Subgroup_1_	1.62519	BC	4.02101	0.0254137
	f__Hungateiclostridiaceae	1.54523	BC	4.34614	0.0249188
	f__Peptococcaceae	3.82057	BC	3.51528	0.00208362
	f__Erysipelotrichaceae	4.84246	BC	4.51518	4.86501e-05	Top10
	f__Akkermansiaceae	5.34117	BC	5.01879	4.86501e-05	Top10
	f__Cyclobacteriaceae	1.77677	ATBx	3.60804	0.0391964
	f__Family_III	1.77443	ATBx	3.80325	0.0404815
	f__Oscillospiraceae	3.88812	BC	3.57764	0.000357454
	f__Lentimicrobiaceae	1.37691	ATBx	3.68788	0.0190638
	f__Coprothermobacteraceae	1.15561	ATBx	4.02229	0.0404815
	f__Defluviitaleaceae	2.01307	BC	3.5841	0.0299334
	f__Legionellaceae	1.38929	ATBx	3.70992	0.0404815
	f__Muribaculaceae	4.92647	BC	4.53206	6.32159e-05	Top10
Supplementary Fig. 2d	LEFSe analysis
	Microbial names	Logarithm value	Groups	LDA value	p value	Note
	f__Desulfovibrionaceae	4.91815	BC	4.35366	0.00382007	Top10
	f__Carnobacteriaceae	0.982375	ATBx+SAP	4.13163	0.0404815
	f__Anaerofustaceae	1.42318	BC	4.60188	0.0144218
	f__Eggerthellaceae	4.0878	BC	3.65568	0.00382007	Top10
	f__unidentified_Chloroplast	4.24105	ATBx+SAP	3.89979	0.00676874
	f__Diplorickettsiaceae	1.27604	ATBx+SAP	3.7624	0.0190638
	f__Atopobiaceae	3.9164	ATBx+SAP	3.55207	0.0163824
	f__Enterobacteriaceae	5.8148	ATBx+SAP	5.478	4.86501e-05	Top10
	f__Lachnospiraceae	5.5091	BC	5.12976	4.86501e-05	Top10
	f__Smithellaceae	1.02093	ATBx+SAP	4.15571	0.0404815
	f__Azospirillaceae	2.10175	ATBx+SAP	3.57775	0.00222692
	f__Hungateiclostridiaceae	1.54523	BC	4.31422	0.00151318
	f__Erysipelotrichaceae	4.84246	BC	4.51336	0.000135723	Top10
	f__Akkermansiaceae	5.34117	BC	4.96422	4.86501e-05	Top10
	f__Bacteroidetes_vadinHA17	1.40009	ATBx+SAP	3.72553	0.0404815
	f__Omnitrophaceae	1.42715	ATBx+SAP	3.5594	0.0404815
	f__Spirosomaceae	1.63352	ATBx+SAP	3.72253	0.033005
	f__Ardenticatenaceae	1.46953	ATBx+SAP	3.68794	0.0404815
	f__Lentimicrobiaceae	2.05803	ATBx+SAP	3.74447	0.0404815
	f__Muribaculaceae	4.92647	BC	4.48608	0.000567769	Top10

[truncated: 4 more sheets: Supplementary Figure 3, Supplementary Figure 4, Supplementary Figure 5, Supplementary Figure 6]
